# Supplementary material for: Gold(I)-Catalyzed Tandem Synthesis of Polycyclic Dihydroquinazolinones
Source: MDPI journal article supplement (doi:10.3390/catal11121436), 2021-11-25

Supplementary material

# Gold(I)-Catalyzed Tandem Synthesis of Polycyclic Dihydroquinazolinones

Jingyang Sun, Yoona Song and Jae-Sang Ryu \*

College of Pharmacy & Graduate School of Pharmaceutical Sciences, Ewha Womans University, 52 Ewhayeodae-gil, Seodaemun-Gu, Seoul 03760, Korea; sunjingyangs@163.com (J.S.); syn3829@naver.com (Y.S.)  
\* Correspondence: ryuj@ewha.ac.kr; Tel.: +82-2-3277-3008

## Table of Contents

|          |                                                                         |           |
|----------|-------------------------------------------------------------------------|-----------|
| <b>1</b> | <b>General Information.....</b>                                         | <b>S2</b> |
| <b>2</b> | <b>Experimental Procedure for the Synthesis of Substrates 1a–u.....</b> | <b>S2</b> |
|          | 2.1. Synthesis of Substrate <b>1a</b> .                                 |           |
|          | 2.2. Synthesis of Substrate <b>1b</b> .                                 |           |
|          | 2.3. Synthesis of Substrate <b>1c</b> .                                 |           |
|          | 2.4. Synthesis of Substrate <b>1d</b> .                                 |           |
|          | 2.5. Synthesis of Substrate <b>1e</b> .                                 |           |
|          | 2.6. Synthesis of Substrate <b>1f</b> .                                 |           |
|          | 2.7. Synthesis of Substrate <b>1g</b> .                                 |           |
|          | 2.8. Synthesis of Substrate <b>1h</b> .                                 |           |
|          | 2.9. Synthesis of Substrate <b>1i</b> .                                 |           |
|          | 2.10. Synthesis of Substrate <b>1j</b> .                                |           |
|          | 2.11. Synthesis of Substrate <b>1k</b> .                                |           |
|          | 2.12. Synthesis of Substrate <b>1l</b> .                                |           |
|          | 2.13. Synthesis of Substrate <b>1m</b> .                                |           |
|          | 2.14. Synthesis of Substrate <b>1n</b> .                                |           |
|          | 2.15. Synthesis of Substrate <b>1o</b> .                                |           |
|          | 2.16. Synthesis of Substrate <b>1p</b> .                                |           |
|          | 2.17. Synthesis of Substrate <b>1q</b> .                                |           |
|          | 2.18. Synthesis of Substrate <b>1r</b> .                                |           |
|          | 2.19. Synthesis of Substrate <b>1s</b> .                                |           |
|          | 2.19. Synthesis of Substrate <b>1t</b> .                                |           |
|          | 2.19. Synthesis of Substrate <b>1u</b> .                                |           |

### 3 $^1\text{H}$ and $^{13}\text{C}$ NMR spectra.....S24

#### 3.1. $^1\text{H}$ and $^{13}\text{C}$ NMR Spectra of Substrates.

#### 3.2. $^1\text{H}$ and $^{13}\text{C}$ NMR Spectra of Products **2a–u**.

### 1. General Information

All reactions were performed in oven-dried glassware fitted with glass stoppers under positive pressure of Ar with magnetic stirring, unless otherwise noted. Air- and moisture-sensitive liquids and solutions were transferred via syringe or stainless-steel cannula. TLC was performed on 0.25 mm E. Merck silica gel 60 F<sub>254</sub> plates and visualized under UV light (254 nm) or by staining with cerium ammonium molybdenate (CAM), potassium permanganate (KMnO<sub>4</sub>), ninhydrin or *p*-anisaldehyde. Flash chromatography was performed on E. Merck 230–400 mesh silica gel 60. Medium-pressure liquid chromatography (MPLC) was performed on a prepacked column (silica gel, 10  $\mu\text{m}$ ) with a UV detector. Reagents were purchased from commercial suppliers, and used without further purification unless otherwise noted. Solvents were distilled from proper drying agents (CaH<sub>2</sub> or Na wire) under Ar atmosphere at 760 mmHg. All moisture- and/or oxygen-sensitive solids were handled and stored in a glovebox under N<sub>2</sub>. NMR spectra were recorded on Agilent Unity 400 instruments or Bruker Avance Neo 400 MHz spectrometer system equipped at Drug Development Research Core Center at 24 °C. Chemical shifts are expressed in ppm relative to TMS ( $^1\text{H}$ , 0 ppm), CDCl<sub>3</sub> ( $^1\text{H}$ , 7.26 ppm;  $^{13}\text{C}$ , 77.2 ppm), DMSO-*d*<sub>6</sub> ( $^1\text{H}$ , 2.50 ppm;  $^{13}\text{C}$ , 39.5 ppm), CD<sub>3</sub>CN ( $^1\text{H}$ , 1.94 ppm;  $^{13}\text{C}$ , 1.3, 118.3 ppm), CD<sub>3</sub>OD ( $^1\text{H}$ , 3.31 ppm;  $^{13}\text{C}$ , 49.1 ppm); coupling constants are expressed in Hz. High resolution mass spectra (HRMS) were obtained by electrospray ionization (ESI, TOF), electron ionization (EI, magnetic sector), chemical ionization (CI, magnetic sector), or fast atom bombardment (FAB, magnetic sector). Infrared spectra were recorded with peaks reported in cm<sup>−1</sup>.

### 2. Experimental Procedure for the Synthesis of Substrates **1a–u**.

#### 2.1. Synthesis of Substrate **1a**.

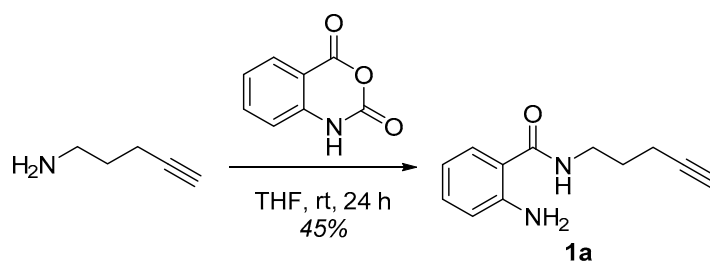

**Scheme S1.** Synthesis of substrate **1a**.

#### Synthesis of 2-amino-N-(pent-4-yn-1-yl)benzamide (**1a**).

In a 250 mL oven-dried round-bottom flask with a side arm, isatoic anhydride (2.45 g, 14.4 mmol) and pent-4-yn-1-amine (1.40 mL, 14.4 mmol) were dissolved in anhydrous THF (66 mL) at 0 °C. The reaction mixture was stirred at room temperature for 24 h. Upon completion of the reaction, the reaction mixture was concentrated *in vacuo* and purified by column chromatography (2:1 hexanes/EtOAc) to afford **1a** (1.30 g, 6.48 mmol, 45%) as a white solid.

**TLC:** *R*<sub>f</sub> 0.3 (2:1 hexanes/EtOAc). **mp:** 73.0–75.0 °C.  $^1\text{H}$  NMR (400 MHz, C<sub>6</sub>D<sub>6</sub>)  $\delta$  7.02 (ddd, *J* = 8.0, 7.2, 1.6 Hz, 1H), 6.84 (dd, *J* = 8.0, 1.6 Hz, 1H), 6.46 (ddd, *J* = 8.0, 7.2, 1.2 Hz, 1H), 6.23 (dd, *J* = 8.0, 1.2 Hz, 1H), 5.45 (brs, 2H), 5.34 (brs, 1H), 3.18 (td, *J* = 7.0, 6.0 Hz, 2H),

1.83 (td,  $J = 7.0, 2.7$  Hz, 2H), 1.72 (t,  $J = 2.7$  Hz, 1H), 1.39 (p,  $J = 7.0$  Hz, 2H).  $^{13}\text{C}$  NMR (100 MHz,  $\text{CDCl}_3$ ):  $\delta$  169.6, 148.9, 132.4, 127.2, 117.5, 116.7, 116.2, 83.7, 69.5, 39.0, 28.2, 16.4. HRMS (ESI)  $m/z$  calculated for  $\text{C}_{12}\text{H}_{15}\text{N}_2\text{O}$   $[\text{M} + \text{H}]^+$  203.1179, found 203.1181.

## 2.2. Synthesis of Substrate 1b.

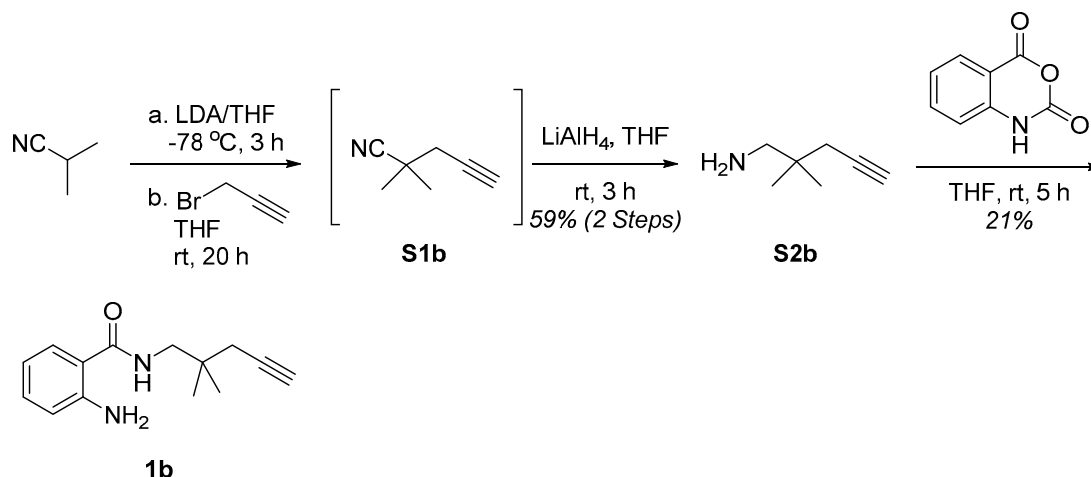

**Scheme S2.** Synthesis of substrate **1b**.

### Synthesis of 2,2-dimethylpent-4-yn-1-amine (**S2b**).

In a 25 mL oven-dried round-bottom flask with a side arm, *iso*-butyronitrile (390  $\mu\text{L}$ , 4.30 mmol) was dissolved in anhydrous THF (2.5 mL). LDA solution (260  $\mu\text{L}$ , 5.20 mmol, 2.0 M in heptane-THF-ethylbenzene) was added dropwise at 0 °C. After stirred at 0 °C for 3 h, 3-bromo-1-propyne (460  $\mu\text{L}$ , 5.20 mmol) was added dropwise at  $-78$  °C via a syringe and stirred at room temperature for 20 h. Upon completion of the reaction, the reaction mixture was quenched with a saturated aqueous  $\text{NH}_4\text{Cl}$  (20 mL). Two phases were separated, and the aqueous layer was extracted with ether ( $3 \times 60$  mL). The combined organic extracts were washed with brine, dried over anhydrous  $\text{MgSO}_4$ , filtered, concentrated *in vacuo*. The crude nitrile **S1b** was very volatile and used for the next reaction without purification.

In a 50 mL oven-dried round-bottom flask with a side arm,  $\text{LiAlH}_4$  (816 mg, 21.5 mmol) was suspended in anhydrous THF (10 mL). A solution of crude nitrile **S1b** in anhydrous THF (7.2 mL) was added dropwise at 0 °C. The resulting grey suspension was stirred at room temperature for 3 h. Upon completion of the reaction, the grey suspension was cooled to 0 °C, diluted with ether (20 mL), and quenched by a sequential addition of water (1.0 mL), a 15% aqueous  $\text{NaOH}$  (1.0 mL), and water (1.5 mL). The white suspension was then dried over anhydrous  $\text{Na}_2\text{SO}_4$ , filtered, concentrated *in vacuo*. The crude residue was purified by column chromatography (12:1  $\text{CH}_2\text{Cl}_2/\text{MeOH}$ ) to afford amine **S2b** (281 mg, 2.53 mmol, 59%, for 2 steps) as a colorless oil.

**TLC:**  $R_f$  0.20 (12:1  $\text{CH}_2\text{Cl}_2/\text{MeOH}$ ).  $^1\text{H}$  NMR (400 MHz,  $\text{CDCl}_3$ ):  $\delta$  2.58 (s, 2H), 2.12 (d,  $J = 2.7$  Hz, 2H), 1.99 (t,  $J = 2.7$  Hz, 1H), 1.30 (brs, 2H), 0.96 (s, 6H).  $^{13}\text{C}$  NMR (100 MHz,  $\text{CDCl}_3$ ):  $\delta$  81.7, 70.6, 51.2, 34.7, 29.5, 24.7. HRMS (ESI)  $m/z$  calcd for  $\text{C}_7\text{H}_{14}\text{N}$   $[\text{M} + \text{H}]^+$  112.1121, found 112.1121.

### Synthesis of 2-amino-N-(2,2-dimethylpent-4-yn-1-yl)benzamide (**1b**) (SYN224A)

In a 25 mL oven-dried round-bottom flask with a side arm, isatoic anhydride (413 mg, 2.53 mmol) and amine **S2b** (260 mg, 2.30 mmol) were dissolved in anhydrous THF

(12 mL) at 0 °C. The reaction mixture was stirred at room temperature for 5 h. Upon completion of the reaction, the reaction mixture was concentrated *in vacuo* and purified by MPLC (15:1 hexanes/EtOAc) to afford **1b** (112 mg, 0.48 mmol, 21%) as a white solid.

**TLC:**  $R_f$  0.39 (3:1 hexanes/EtOAc). **mp:** 72.2–74.2 °C.  **$^1\text{H}$  NMR** (400 MHz,  $\text{CDCl}_3$ ):  $\delta$  7.32 (dd,  $J$  = 7.8, 1.5 Hz, 1H), 7.21 (ddd,  $J$  = 8.6, 7.2, 1.5 Hz, 1H), 6.72–6.62 (m, 2H), 6.32 (brs, 1H), 5.48 (brs, 2H), 3.39 (d,  $J$  = 6.4 Hz, 2H), 2.20 (d,  $J$  = 2.7 Hz, 2H), 2.08 (t,  $J$  = 2.7 Hz, 1H), 1.07 (s, 6H).  **$^{13}\text{C}$  NMR** (100 MHz,  $\text{CDCl}_3$ ):  $\delta$  169.6, 148.8, 132.4, 127.1, 117.5, 116.8, 116.5, 82.0, 71.0, 48.7, 35.1, 30.2, 25.3. **HRMS (ESI)**  $m/z$  calcd for  $\text{C}_{14}\text{H}_{19}\text{N}_2\text{O}$   $[\text{M} + \text{H}]^+$  231.1492, found 231.1492.

### 2.3. Synthesis of Substrate 1c.

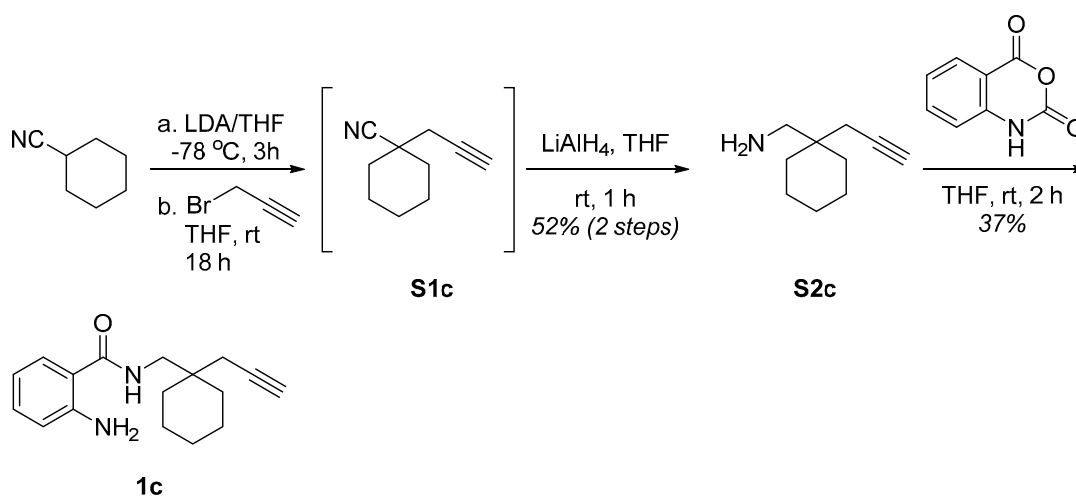

**Scheme S3.** Synthesis of substrate **1c**.

#### Synthesis of (1-(prop-2-yn-1-yl)cyclohexyl)methanamine (**S2c**).

In a 25 mL oven-dried round-bottom flask with a side arm, *iso*-butyronitrile (540  $\mu\text{L}$ , 4.60 mmol) was dissolved in anhydrous THF (2.7 mL). LDA solution (280  $\mu\text{L}$ , 5.50 mmol, 2.0 M in heptane-THF-ethylbenzene) was added dropwise at 0 °C. After stirred at 0 °C for 3 h, 3-bromo-1-propyne (490  $\mu\text{L}$ , 5.50 mmol) was added dropwise at –78 °C via a syringe and stirred at room temperature for 18 h. Upon completion of the reaction, the reaction mixture was quenched with a saturated aqueous  $\text{NH}_4\text{Cl}$  (20 mL). Two phases were separated, and the aqueous layer was extracted with ether (4  $\times$  40 mL). The combined organic extracts were washed with brine, dried over anhydrous  $\text{MgSO}_4$ , filtered, concentrated *in vacuo*. The crude nitrile **S1c** was very volatile and used for the next reaction without purification.

In a 100 mL oven-dried round-bottom flask with a side arm,  $\text{LiAlH}_4$  (872 mg, 23.0 mmol) was suspended in anhydrous THF (15 mL). A solution of crude nitrile **S1c** in anhydrous THF (8.0 mL) was added dropwise at 0 °C. The resulting grey suspension was stirred at room temperature for 1 h. Upon completion of the reaction, the grey suspension was cooled to 0 °C, diluted with ether (30 mL), and quenched by a sequential addition of water (1.5 mL), a 15% aqueous  $\text{NaOH}$  (1.5 mL), and water (2.7 mL). The white suspension was then dried over anhydrous  $\text{Na}_2\text{SO}_4$ , filtered, concentrated *in vacuo*. The crude residue was purified by column chromatography (15:1  $\text{CH}_2\text{Cl}_2/\text{MeOH}$ ) to afford amine **S2c** (365 mg, 2.41 mmol, 52% for 2 steps) as a colorless oil. Since the amine **S2c** was volatile, it was converted into the corresponding amine salt **S2c'** for characterization:  $\text{HCl}$  solution (120  $\mu\text{L}$ , 500  $\mu\text{mol}$ , 4 M in dioxane) was added to amine **S2c** (50.0 mg, 330  $\mu\text{mol}$ ). After concentrated,  $\text{Et}_2\text{O}$  (0.5 mL) was added. The resulting precipitate was filtered



off and washed with Et<sub>2</sub>O (10 mL). The amine salt **S2c'** was obtained as a white solid.

**S2c'**: **TLC**: *R<sub>f</sub>* 0.13 (15:1 CH<sub>2</sub>Cl<sub>2</sub>/MeOH). **mp**: 192.3–194.3 °C. **<sup>1</sup>H NMR** (400 MHz, CDCl<sub>3</sub>): δ 8.36 (brs, 3H), 3.04 (s, 2H), 2.47 (d, *J* = 2.6 Hz, 2H), 2.08 (t, *J* = 2.6 Hz, 1H), 1.56–1.34 (m, 10H). **<sup>13</sup>C NMR** (100 MHz, CDCl<sub>3</sub>): δ 80.0, 72.3, 46.8, 35.7, 32.6, 25.6, 25.5, 21.4. **HRMS (ESI)** *m/z* calcd for C<sub>10</sub>H<sub>18</sub>N [M]<sup>+</sup> 152.1434, found 152.1434.

#### Synthesis of 2-amino-N-((1-(prop-2-yn-1-yl)cyclohexyl)methyl)benzamide (**1c**).

In a 25 mL oven-dried round-bottom flask with a side arm, isatoic anhydride (374 mg, 2.20 mmol) and amine **S2c** (302 mg, 2.00 mmol) were dissolved in anhydrous THF (10 mL) at 0 °C. The reaction mixture was stirred at room temperature for 2 h. Upon completion of the reaction, the reaction mixture was concentrated *in vacuo* and purified by column chromatography (3:1 hexanes/EtOAc) to afford **1d** (199 mg, 737 μmol, 37%) as a white solid.

**TLC**: *R<sub>f</sub>* 0.30 (3:1 hexanes/EtOAc). **mp**: 88.5–90.5 °C. **<sup>1</sup>H NMR** (400 MHz, CDCl<sub>3</sub>): δ 7.33 (dd, *J* = 7.8, 1.5 Hz, 1H), 7.20 (ddd, *J* = 8.2, 7.2, 1.5 Hz, 1H), 6.71–6.61 (m, 2H), 6.44 (brs, 1H), 5.50 (brs, 2H), 3.49 (d, *J* = 6.3 Hz, 2H), 2.27 (d, *J* = 2.7 Hz, 2H), 2.10 (t, *J* = 2.7 Hz, 1H), 1.64–1.55 (m, 2H), 1.50–1.40 (m, 8H). **<sup>13</sup>C NMR** (100 MHz, CDCl<sub>3</sub>): δ 169.6, 148.9, 132.3, 127.1, 117.4, 116.7, 116.6, 82.1, 71.4, 46.6, 37.2, 33.6, 27.3, 26.1, 21.7. **HRMS (ESI)** *m/z* calcd for C<sub>17</sub>H<sub>23</sub>N<sub>2</sub>O [M + H]<sup>+</sup> 271.1805, found 271.1811.

#### 2.4. Synthesis of Substrate **1d**.

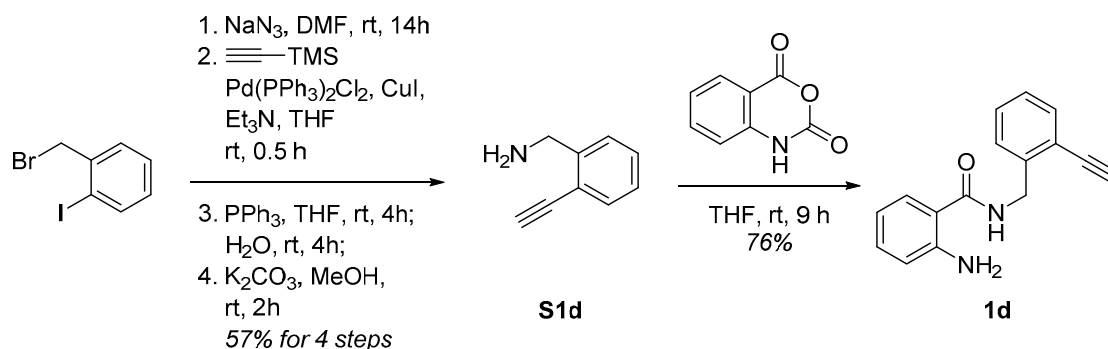

**Scheme S4.** Synthesis of substrate **1d**.

In a 50 mL oven-dried round-bottom flask with a side arm, 2-iodobenzyl bromide (1.30 g, 4.38 mmol) and NaN<sub>3</sub> (854 mg, 13.1 mmol) were dissolved in anhydrous DMF (7.3 mL). The reaction mixture was stirred at room temperature for 14 h. Upon completion of the reaction, the mixture was diluted with water (50 mL) and extracted with *n*-hexane (3 × 100 mL). The combined organic extracts were dried over anhydrous MgSO<sub>4</sub> and filtered. The concentration by rotary evaporation afforded a volatile crude 1-(azidomethyl)-2-iodobenzene as a colorless liquid, which was used directly in the next step without further purification. In a 50 mL oven-dried round-bottom flask with a side arm, the crude 1-(azidomethyl)-2-iodobenzene, Pd(PPh<sub>3</sub>)<sub>2</sub>Cl<sub>2</sub> (154 mg, 219 μmol), CuI (83.4 mg, 438 μmol), trimethylethynylsilane (473 mg, 4.82 mmol), and Et<sub>3</sub>N (21 mL) were dissolved in anhydrous THF (10 mL). The reaction mixture was stirred at room temperature for 30 min. Upon completion of the reaction, the mixture was quenched with saturated aqueous NH<sub>4</sub>Cl (3.0 mL) and extracted with ether (3 × 100 mL). The combined organic extracts were dried over anhydrous MgSO<sub>4</sub> and filtered. The concentration by rotary evaporation gave a crude ((2-(azidomethyl)phenyl)ethynyl)trimethylsilane as a brown liquid, which was used directly in the next step without further purification. In a 50 mL oven-dried round-bottom flask with a side arm, the crude ((2-(azidomethyl)phenyl)ethynyl)trimethylsilane and PPh<sub>3</sub>

(2.30 g, 8.76 mmol) were dissolved in anhydrous THF (5.0 mL). After stirred at room temperature for 4 h, water (5.0 mL) was added, and the mixture was stirred at room temperature for 4 h. Next,  $K_2CO_3$  (1.21 g, 8.76 mmol) and MeOH (1.0 mL) were added, and the mixture was stirred at room temperature for 2 h. The resultant solution was then extracted with  $CH_2Cl_2$  ( $3 \times 100$  mL), dried over anhydrous  $Na_2SO_4$ , filtered, concentrated *in vacuo*. The crude residue was purified by column chromatography (10:1  $CH_2Cl_2$ /MeOH) to afford amine **S1d** (330 mg, 2.52 mmol, 58% for 4 steps) as a purple oil.

**TLC:**  $R_f$  0.25 (10:1  $CH_2Cl_2$ /MeOH).  **$^1H$  NMR** (400 MHz,  $CDCl_3$ ):  $\delta$  7.50 (d,  $J$  = 8.2 Hz, 1H), 7.35 (qd,  $J$  = 7.6, 1.6 Hz, 2H), 7.23 (td,  $J$  = 7.4, 2.0 Hz, 1H), 4.01 (s, 2H), 3.33 (s, 1H), 1.92 (s, 2H).  **$^{13}C$  NMR** (100 MHz,  $CDCl_3$ ):  $\delta$  145.9, 133.2, 129.4, 128.2, 127.6, 126.9, 120.9, 81.8, 45.5. **HRMS (ESI)**  $m/z$  calcd for  $C_9H_{10}N$   $[M + H]^+$  132.0808, found 132.0809.

### Synthesis of 2-amino-N-(2-ethynylbenzyl)benzamide (**1d**).

In a 25 mL oven-dried round-bottom flask with a side arm, isatoic anhydride (424 mg, 2.60 mmol) and amine **S1d** (340 mg, 2.60 mmol) were dissolved in anhydrous THF (13 mL) at 0 °C. The reaction mixture was stirred at room temperature for 9 h. Upon completion of the reaction, the reaction mixture was concentrated *in vacuo* and purified by column chromatography (3:1 hexanes/EtOAc) to afford **1d** (495 mg, 1.98 mmol, 76%) as a purple solid.

**TLC:**  $R_f$  0.23 (3:1 hexanes/EtOAc). **mp:** 104.0–106.0 °C.  **$^1H$  NMR** (400 MHz,  $CDCl_3$ ):  $\delta$  7.53 (dd,  $J$  = 7.7, 1.4 Hz, 1H), 7.43 (ddd,  $J$  = 7.7, 1.4, 0.7 Hz, 1H), 7.38–7.30 (m, 2H), 7.29–7.24 (m, 3H), 7.20 (ddd,  $J$  = 8.5, 7.2, 1.4 Hz, 1H), 6.70–6.62 (m, 2H), 6.58 (s, 1H), 5.53 (s, 2H), 4.75 (d,  $J$  = 5.9 Hz, 2H), 3.38 (s, 1H).  **$^{13}C$  NMR** (100 MHz,  $CDCl_3$ ):  $\delta$  169.0, 148.9, 140.7, 133.1, 132.4, 129.3, 128.7, 127.5, 127.1, 121.3, 117.3, 116.6, 115.9, 82.1, 81.6, 42.3. **HRMS (ESI)**  $m/z$  calcd for  $C_{16}H_{15}N_2O$   $[M + H]^+$  251.1179, found 251.1183.

### 2.5. Synthesis of Substrate **1e**.

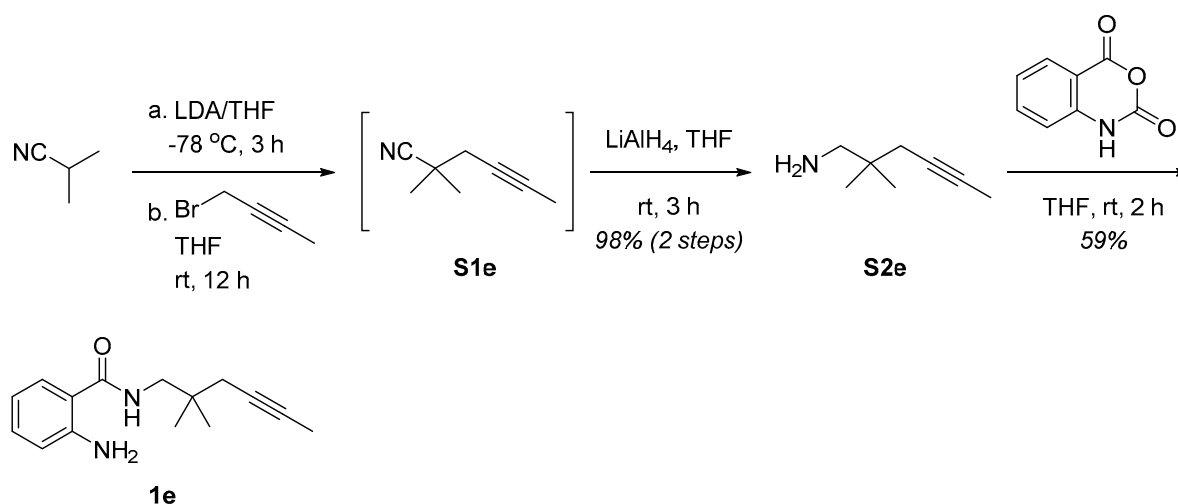

**Scheme S5.** Synthesis of substrate **1e**.

### Synthesis of 2,2-dimethylhex-4-yn-1-amine (**S2e**).

In a 25 mL oven-dried round-bottom flask with a side arm, *iso*-butyronitrile (390  $\mu$ L, 4.30 mmol) was dissolved in anhydrous THF (2.5 mL). LDA solution (260  $\mu$ L, 5.20 mmol, 2.0 M in heptane-THF-ethylbenzene) was added dropwise at 0 °C. After stirred at 0 °C for 3 h, 1-bromo-2-butyne (470  $\mu$ L, 5.20 mmol) was added dropwise at  $-78$  °C via a syringe and stirred at room temperature for 12 h. Upon completion of the reaction, the reaction mixture was quenched with a saturated aqueous

NH<sub>4</sub>Cl (20 mL). Two phases were separated, and the aqueous layer was extracted with ether (3 × 40 mL). The combined organic extracts were washed with brine, dried over anhydrous MgSO<sub>4</sub>, filtered, concentrated *in vacuo*. The crude nitrile **S1e** was very volatile and used for the next reaction without purification.

In a 100 mL oven-dried round-bottom flask with a side arm, LiAlH<sub>4</sub> (816 mg, 21.5 mmol) was suspended in anhydrous THF (10 mL). A solution of crude nitrile **S1e** in anhydrous THF (7.2 mL) was added dropwise at 0 °C. The resulting grey suspension was stirred at room temperature for 2 h. Upon completion of the reaction, the grey suspension was cooled to 0 °C, diluted with ether (20 mL), and quenched by a sequential addition of water (1.0 mL), a 15% aqueous NaOH (1.0 mL), and water (1.5 mL). The white suspension was then dried over anhydrous Na<sub>2</sub>SO<sub>4</sub>, filtered, concentrated *in vacuo*. The crude residue was purified by column chromatography (17:1 CH<sub>2</sub>Cl<sub>2</sub>/MeOH) to afford amine **S2e** (525 mg, 4.20 mmol, 98% for 2 steps) as a colorless oil. Since the amine **S2e** was volatile, it was converted into the corresponding amine salt **S2e'** for characterization: HCl solution (0.11 mL, 0.44 mmol, 4 M in dioxane) was added to amine **S2e** (36.5 mg, 291 µmol). After concentrated, Et<sub>2</sub>O (0.5 mL) was added. The resulting precipitate was filtered off and washed with Et<sub>2</sub>O (10 mL). The amine salt **S2e'** was obtained as a white solid.

**S2e'**: TLC: *R<sub>f</sub>* 0.10 (17:1 CH<sub>2</sub>Cl<sub>2</sub>/MeOH). mp: 186.8–188.8 °C. <sup>1</sup>H NMR (400 MHz, CD<sub>3</sub>CN): δ 8.07 (s, 3H), 2.86 (s, 2H), 2.23 (q, *J* = 2.6 Hz, 2H), 1.77 (t, *J* = 2.6 Hz, 3H), 1.07 (s, 6H). <sup>13</sup>C NMR (100 MHz, CD<sub>3</sub>CN): δ 79.6, 76.1, 49.3, 34.1, 30.6, 24.9, 3.4. HRMS (ESI) *m/z* calcd for C<sub>8</sub>H<sub>16</sub>N [M]<sup>+</sup> 126.1277, found 126.1276.

#### Synthesis of 2-amino-N-(2,2-dimethylhex-4-yn-1-yl)benzamide (**1e**).

In a 25 mL oven-dried round-bottom flask with a side arm, isatoic anhydride (431 mg, 2.60 mmol) and amine **S2e** (300 mg, 2.40 mmol) were dissolved in anhydrous THF (12 mL) at 0 °C. The reaction mixture was stirred at room temperature for 2 h. Upon completion of the reaction, the reaction mixture was concentrated *in vacuo* and purified by column chromatography (3:1 hexanes/EtOAc) to afford **1e** (377 mg, 1.54 mmol, 59%) as a white solid.

TLC: *R<sub>f</sub>* 0.28 (3:1 hexanes/EtOAc). mp: 72.0–74.0 °C. <sup>1</sup>H NMR (400 MHz, CDCl<sub>3</sub>): δ 7.34 (dd, *J* = 7.8, 1.5 Hz, 1H), 7.20 (ddd, *J* = 8.1, 7.2, 1.5 Hz, 1H), 6.72–6.61 (m, 2H), 6.55 (s, 1H), 5.48 (s, 2H), 3.36 (d, *J* = 6.2 Hz, 2H), 2.14 (q, *J* = 2.6 Hz, 2H), 1.81 (t, *J* = 2.6 Hz, 3H), 1.03 (s, 6H). <sup>13</sup>C NMR (100 MHz, CDCl<sub>3</sub>): δ 169.2, 148.5, 132.0, 126.8, 117.1, 116.4, 116.4, 78.2, 77.1, 48.9, 34.7, 30.5, 25.2, 3.4. HRMS (ESI) *m/z* calcd for C<sub>15</sub>H<sub>21</sub>N<sub>2</sub>O [M + H]<sup>+</sup> 245.1648, found 245.1650.

#### 2.6. Synthesis of Substrate **1f**.

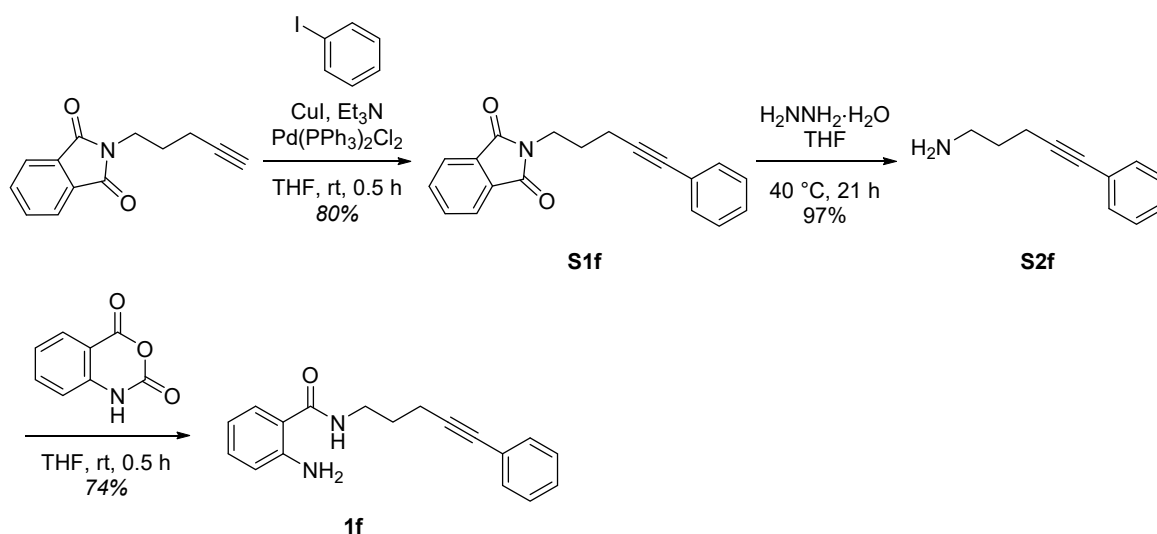

Scheme S6. Synthesis of substrate 1f.

### Synthesis of 2-(5-phenylpent-4-yn-1-yl)isoindoline-1,3-dione (S1f).

In a 100 mL oven-dried round-bottom flask with a side arm, *N*-(4-pentynyl)phthalimide (1.00 g, 4.70 mmol), Pd(PPh<sub>3</sub>)<sub>2</sub>Cl (165 mg, 235 μmol, 5 mol%) and CuI (90.0 mg, 470 μmol, 10 mol%) were placed. A solution of iodobenzene (520 μL, 4.70 mmol, 1 equiv.) and anhydrous Et<sub>3</sub>N (23.5 mL) in anhydrous THF (12 mL) was added via a syringe and stirred at room temperature for 0.5 h. Upon completion of the reaction, the reaction mixture was quenched with a saturated aqueous NaHCO<sub>3</sub> (50 mL). Two phases were separated, and the aqueous layer was extracted with CH<sub>2</sub>Cl<sub>2</sub> (4 × 50 mL). The combined organic extracts were dried over anhydrous MgSO<sub>4</sub>, filtered, and concentrated *in vacuo*. The crude residue was purified by column chromatography (7:1 hexanes/EtOAc) to afford **S1f** (1.09 g, 3.76 mmol, 80%) as an orange solid.

**TLC:** *R<sub>f</sub>* 0.20 (6:1 hexanes/EtOAc). **mp:** 129.6–131.6 °C. **<sup>1</sup>H NMR** (400 MHz, CDCl<sub>3</sub>): δ 7.82 (dd, *J* = 5.4, 3.1 Hz, 2H), 7.67 (dd, *J* = 5.4, 3.1 Hz, 2H), 7.30–7.27 (m, 2H), 7.24–7.20 (m, 3H), 3.87 (t, *J* = 7.0 Hz, 2H), 2.50 (t, *J* = 7.0 Hz, 2H), 2.02 (quin, *J* = 7.0 Hz, 2H). **<sup>13</sup>C NMR** (100 MHz, CDCl<sub>3</sub>): δ 168.6, 134.0, 132.3, 131.6, 128.2, 127.7, 123.8, 123.4, 88.8, 81.4, 37.6, 27.5, 17.5. **HRMS (ESI)** *m/z* calculated for C<sub>19</sub>H<sub>16</sub>NO<sub>2</sub> [*M* + *H*]<sup>+</sup> 290.1176, found: 290.1178.

### Synthesis of 5-phenylpent-4-yn-1-amine (S2f).

In a 25 mL oven-dried round-bottom flask with a side arm, phthalimide **S1f** (1.05 g, 3.60 mmol) was dissolved in anhydrous THF (5.3 mL). Hydrazine monohydrate (1.50 mL, 31.0 mmol) was added dropwise. The reaction mixture was stirred at 40 °C for 21 h. Upon completion of the reaction, the reaction mixture was diluted with ether (100 mL) and the precipitate was filtered off. The organic filtrate was washed with 10% aqueous NaOH solution (20 mL), dried over anhydrous Na<sub>2</sub>SO<sub>4</sub>, filtered, and concentrated *in vacuo* to afford crude amine **S2f** (548 mg, 97%) as orange oil.

**TLC:** *R<sub>f</sub>* 0.05 (CH<sub>2</sub>Cl<sub>2</sub>). **<sup>1</sup>H NMR** (400 MHz, CDCl<sub>3</sub>): δ 7.41–7.37 (m, 2H), 7.29–7.26 (m, 3H), 2.87 (t, *J* = 6.9 Hz, 2H), 2.49 (t, *J* = 7.0 Hz, 2H), 1.74 (quin, *J* = 6.9 Hz, 2H), 1.25 (s, 2H). **<sup>13</sup>C NMR** (100 MHz, CDCl<sub>3</sub>): δ 131.7, 128.3, 127.7, 124.0, 89.7, 81.1, 41.5, 32.6, 17.0. **HRMS (ESI)** *m/z* calculated for C<sub>11</sub>H<sub>14</sub>N [*M* + *H*]<sup>+</sup> 160.1121, found 160.1124.

### Synthesis of 2-amino-N-(5-phenylpent-4-yn-1-yl)benzamide (1f).

In a 25 mL oven-dried round-bottom flask with a side arm, isatoic anhydride (560 mg, 3.40 mmol) and amine **S2g** (547 mg, 3.40 mmol) were dissolved in anhydrous THF (17 mL) at 0 °C. The reaction mixture was stirred at room temperature for 0.5 h. Upon

completion of the reaction, the reaction mixture was concentrated *in vacuo* and purified by column chromatography (3:1 hexanes/EtOAc) to afford **1f** (696 mg, 2.52 mmol, 74%) as a white solid.

**TLC:**  $R_f$  0.23 (2:1 hexanes/EtOAc). **mp:** 97.9–99.9 °C.  **$^1\text{H}$  NMR** (400 MHz,  $\text{CDCl}_3$ ):  $\delta$  7.42–7.34 (m, 2H), 7.31–7.27 (m, 4H), 7.17 (ddd,  $J$  = 8.6, 7.2, 1.5 Hz, 1H), 6.66 (dd,  $J$  = 8.2, 1.2 Hz, 1H), 6.51 (ddd,  $J$  = 8.2, 7.2, 1.2 Hz, 1H), 6.39 (s, 1H), 5.52 (s, 2H), 3.61 (td,  $J$  = 6.8, 5.7 Hz, 2H), 2.56 (t,  $J$  = 6.8 Hz, 2H), 1.94 (quin,  $J$  = 6.8 Hz, 2H).  **$^{13}\text{C}$  NMR** (100 MHz,  $\text{CDCl}_3$ ):  $\delta$  169.5, 148.9, 132.4, 131.8, 128.4, 128.0, 127.2, 123.6, 117.4, 116.7, 116.2, 89.3, 81.8, 39.5, 28.4, 17.6. **HRMS (ESI)**  $m/z$  calcd for  $\text{C}_{18}\text{H}_{19}\text{N}_2\text{O}$   $[\text{M} + \text{H}]^+$  279.1492, found 279.1495.

### 2.7. Synthesis of Substrate 1g.

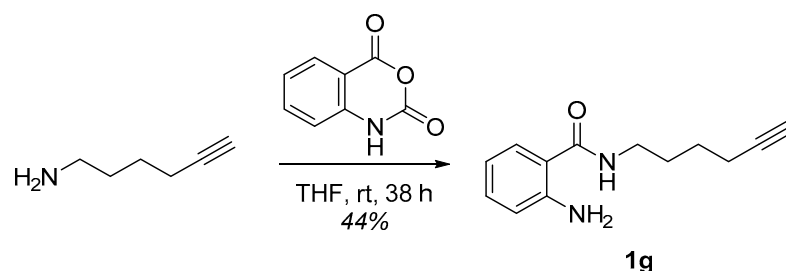

**Scheme S7.** Synthesis of substrate **1g**.

### Synthesis of 2-amino-N-(hex-5-yn-1-yl)benzamide (**1g**).

In a 25 mL oven-dried round-bottom flask with a side arm, isatoic anhydride (839 mg, 5.14 mmol) and hex-5-yn-1-amine (580  $\mu\text{L}$ , 5.14 mmol) were dissolved in anhydrous THF (26 mL) at 0 °C. The reaction mixture was stirred at room temperature for 38 h. Upon completion of the reaction, the reaction mixture was concentrated *in vacuo* and purified by column chromatography (2.5:1 hexanes/EtOAc) to afford **1g** (490 mg, 2.26 mmol, 44%) as a purple solid.

**TLC:**  $R_f$  0.23 (2.5:1 hexanes/EtOAc). **mp:** 50.6–52.6 °C.  **$^1\text{H}$  NMR** (400 MHz,  $\text{CDCl}_3$ ):  $\delta$  7.30 (dd,  $J$  = 7.9, 1.5 Hz, 1H), 7.20 (td,  $J$  = 7.6, 1.2 Hz, 1H), 6.71–6.61 (m, 2H), 6.06 (brs, 1H), 5.49 (brs, 2H), 3.45 (td,  $J$  = 7.0, 5.8 Hz, 2H), 2.26 (td,  $J$  = 6.8, 2.6 Hz, 2H), 1.97 (t,  $J$  = 2.6 Hz, 1H), 1.78–1.70 (m, 2H), 1.67–1.60 (m, 2H).  **$^{13}\text{C}$  NMR** (100 MHz,  $\text{CDCl}_3$ ):  $\delta$  169.50, 148.79, 132.38, 127.13, 117.46, 116.75, 116.42, 84.18, 68.94, 39.26, 28.87, 25.93, 18.29. **HRMS (ESI)**  $m/z$  calculated for  $\text{C}_{13}\text{H}_{17}\text{N}_2\text{O}$   $[\text{M} + \text{H}]^+$  217.1335, found 217.1339.

### 2.8. Synthesis of Substrate 1h.

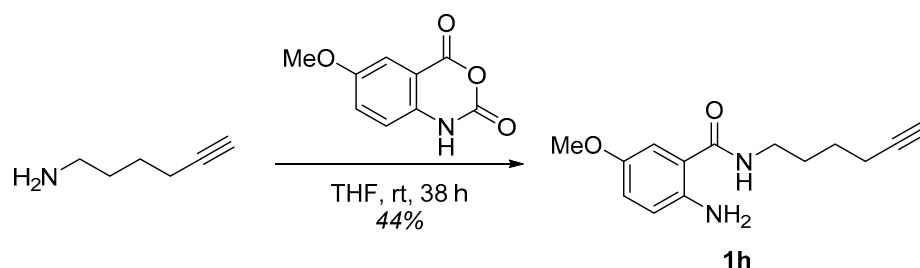

**Scheme S8.** Synthesis of substrate **1h**.

### Synthesis of 2-amino-N-(hex-5-yn-1-yl)-5-methoxybenzamide (**1h**).

In a 25 mL oven-dried round-bottom flask with a side arm, 5-methoxyisatoic anhydride (500 mg, 2.59 mmol) and hex-5-yn-1-amine (876  $\mu\text{L}$ , 7.76 mmol) were dissolved in anhydrous THF (25 mL) at 0 °C. The reaction mixture was stirred at room temperature for

36 h. Upon completion of the reaction, the reaction mixture was concentrated *in vacuo* and purified by column chromatography (2.5:1 hexanes/EtOAc) to afford **1h** (593 mg, 2.41 mmol, 93%) as a yellow solid.

**TLC:**  $R_f$  0.20 (2.5:1 hexanes/EtOAc). **mp:** 61.0–62.3 °C.  **$^1\text{H}$  NMR** (400 MHz,  $\text{DMSO-}d_6$ )  $\delta$  8.22 (t,  $J$  = 5.7 Hz, 1H), 7.03 (d,  $J$  = 2.9 Hz, 1H), 6.82 (dd,  $J$  = 8.8, 2.9 Hz, 1H), 6.64 (d,  $J$  = 8.9 Hz, 1H), 5.91 (s, 2H), 3.68 (s, 3H), 3.21 (td,  $J$  = 6.9, 5.7 Hz, 2H), 2.76 (t,  $J$  = 2.7 Hz, 1H), 2.19 (td,  $J$  = 7.0, 2.7 Hz, 2H), 1.65–1.54 (m, 2H), 1.54–1.42 (m, 2H).  **$^{13}\text{C}$  NMR** (100 MHz,  $\text{DMSO-}d_6$ ):  $\delta$  168.49, 149.32, 143.66, 119.14, 117.59, 115.33, 112.13, 84.44, 71.23, 55.57, 38.20, 28.32, 25.53, 17.43. **HRMS (ESI)**  $m/z$  calculated for  $\text{C}_{14}\text{H}_{19}\text{N}_2\text{O}_2$   $[\text{M} + \text{H}]^+$  247.1441, found 247.1440.

### 2.9. Synthesis of Substrate 1i.

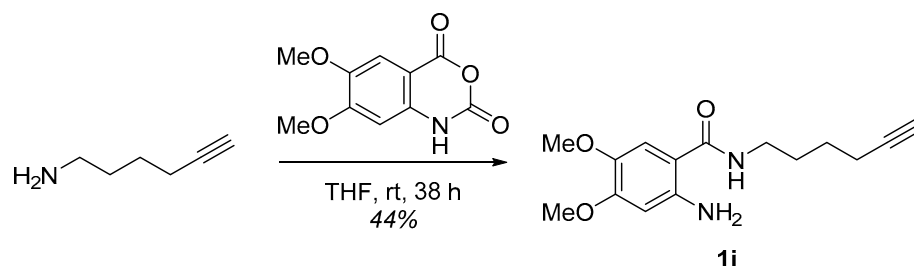

**Scheme S9.** Synthesis of substrate **1i**.

### Synthesis of 2-amino-N-(hex-5-yn-1-yl)benzamide (**1i**).

In a 25 mL oven-dried round-bottom flask with a side arm, 4,5-dimethoxyisatoic anhydride (500 mg, 2.24 mmol) and hex-5-yn-1-amine (632  $\mu\text{L}$ , 5.60 mmol) were dissolved in anhydrous THF (11 mL) at 0 °C. The reaction mixture was stirred at room temperature for 23 h. Upon completion of the reaction, the reaction mixture was concentrated *in vacuo* and purified by column chromatography (2.5:1 hexanes/EtOAc) to afford **1i** (581 mg, 2.10 mmol, 94%) as a white solid.

**TLC:**  $R_f$  0.21 (2:1 hexanes/EtOAc). **mp:** 75.1–76.3 °C.  **$^1\text{H}$  NMR** (400 MHz,  $\text{DMSO-}d_6$ )  $\delta$  8.00 (t,  $J$  = 5.7 Hz, 1H), 7.07 (s, 1H), 6.29 (d,  $J$  = 2.7 Hz, 3H), 3.70 (s, 3H), 3.67 (s, 3H), 3.19 (td,  $J$  = 6.9, 5.6 Hz, 2H), 2.76 (t,  $J$  = 2.6 Hz, 1H), 2.19 (td,  $J$  = 6.9, 2.7 Hz, 2H), 1.65–1.52 (m, 2H), 1.47 (dtd,  $J$  = 9.5, 7.0, 4.9 Hz, 2H).  **$^{13}\text{C}$  NMR** (100 MHz,  $\text{DMSO-}d_6$ ):  $\delta$  168.40, 152.69, 146.21, 138.97, 112.55, 105.25, 99.89, 84.50, 71.27, 56.73, 55.09, 38.18, 28.55, 25.61, 17.48. **HRMS (ESI)**  $m/z$  calculated for  $\text{C}_{15}\text{H}_{21}\text{N}_2\text{O}_3$   $[\text{M} + \text{H}]^+$  277.1547, found 277.1540.

### 2.10. Synthesis of Substrate 1j.

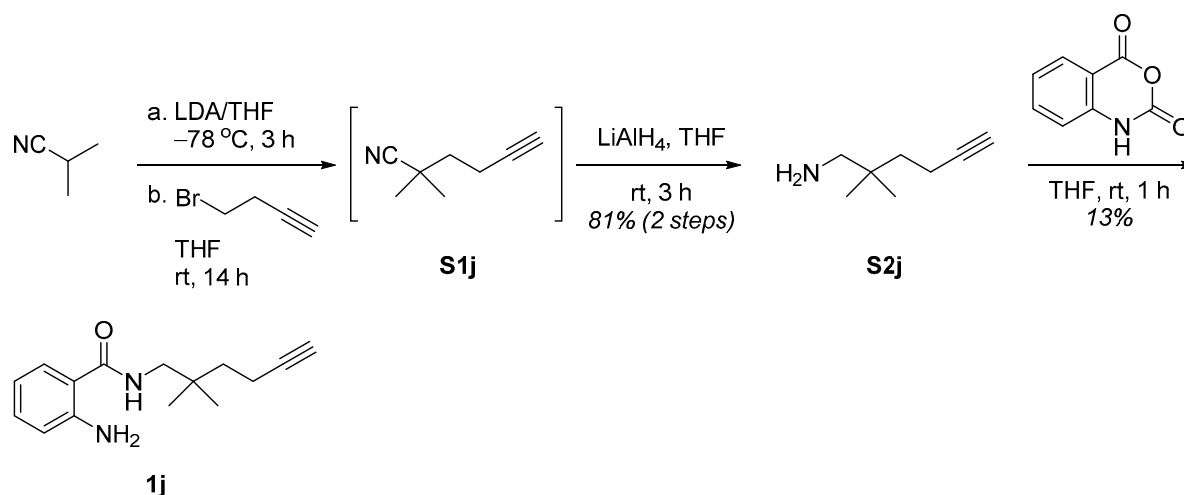

Scheme S10. Synthesis of substrate 1j.

### Synthesis of 2,2-dimethylhex-5-yn-1-amine (S2j).

In a 25 mL oven-dried round-bottom flask with a side arm, *iso*-butyronitrile (650  $\mu$ L, 7.20 mmol) was dissolved in anhydrous THF (4.3 mL). LDA solution (440  $\mu$ L, 8.70 mmol, 2.0 M in heptane-THF-ethylbenzene) was added dropwise at 0 °C. After stirred at 0 °C for 3 h, 4-bromo-1-butyne (820  $\mu$ L, 8.70 mmol) was added dropwise at –78 °C via a syringe and stirred at room temperature for 14 h. Upon completion of the reaction, the reaction mixture was quenched with a saturated aqueous  $\text{NH}_4\text{Cl}$  (20 mL). Two phases were separated, and the aqueous layer was extracted with ether (3  $\times$  40 mL). The combined organic extracts were washed with brine, dried over anhydrous  $\text{MgSO}_4$ , filtered, concentrated *in vacuo*. The crude nitrile **S1j** was very volatile and used for the next reaction without purification.

In a 50 mL oven-dried round-bottom flask with a side arm,  $\text{LiAlH}_4$  (391 mg, 10.3 mmol) was suspended in anhydrous THF (5.3 mL). A solution of crude nitrile **S1j** in anhydrous THF (5.0 mL) was added dropwise at 0 °C. The resulting grey suspension was stirred at room temperature for 6 h. Upon completion of the reaction, the grey suspension was cooled to 0 °C, diluted with ether (20 mL), and quenched by a sequential addition of water (1.0 mL), a 15% aqueous  $\text{NaOH}$  (1.0 mL), and water (1.5 mL). The resulting white suspension was then dried over anhydrous  $\text{Na}_2\text{SO}_4$ , filtered, concentrated *in vacuo*. The crude residue was purified by column chromatography (15:1  $\text{CH}_2\text{Cl}_2/\text{MeOH}$ ) to afford amine **S2j** (730 mg, 5.83 mmol, 81% for 2 steps) as a colorless oil. Since the amine **S2j** was volatile, it was converted into the corresponding amine salt **S2j'** for characterization:  $\text{HCl}$  solution (60.0  $\mu$ L, 230  $\mu$ mol, 4 M in dioxane) was added to amine **S2j** (18.7 mg, 150  $\mu$ mol). After concentrated,  $\text{Et}_2\text{O}$  (0.5 mL) was added. The resulting precipitate was filtered off and washed with  $\text{Et}_2\text{O}$  (10 mL). The amine salt **S2j'** was obtained as white solid.

**S2j'**: TLC:  $R_f$  0.15 (15:1  $\text{CH}_2\text{Cl}_2/\text{MeOH}$ ). mp: 126.1–128.1 °C.  $^1\text{H}$  NMR (400 MHz,  $\text{CDCl}_3$ ):  $\delta$  8.38 (s, 3H), 2.86 (s, 2H), 2.22 (td,  $J$  = 7.7, 2.7 Hz, 2H), 1.98 (t,  $J$  = 2.7 Hz, 1H), 1.66 (t,  $J$  = 7.7 Hz, 4H), 1.10 (s, 6H).  $^{13}\text{C}$  NMR (100 MHz,  $\text{CDCl}_3$ ):  $\delta$  84.1, 69.2, 49.5, 38.4, 33.4, 24.7, 13.6. HRMS (ESI)  $m/z$  calcd for  $\text{C}_8\text{H}_{16}\text{N} [\text{M}]^+$  126.1277, found 126.1279.

### Synthesis of 2-amino-N-(2,2-dimethylhex-5-yn-1-yl)benzamide (1j).

In a 25 mL oven-dried round-bottom flask with a side arm, isatoic anhydride (1.29 g, 7.90 mmol) and amine **S2j** (901 mg, 7.20 mmol) were dissolved in anhydrous THF (36 mL) at 0 °C. The reaction mixture was stirred at room temperature for 1 h. Upon comple-

tion of the reaction, the reaction mixture was concentrated *in vacuo* and purified by column chromatography (4:1 hexanes/EtOAc) to afford **1j** (233 mg, 0.95 mmol, 13%) as a white solid.

**TLC:**  $R_f$  0.18 (4:1 hexanes/EtOAc). **mp:** 72.7–74.7 °C.  **$^1\text{H}$  NMR** (400 MHz,  $\text{CDCl}_3$ ):  $\delta$  7.32 (dd,  $J$  = 7.8, 1.5 Hz, 1H), 7.21 (ddd,  $J$  = 8.2, 7.2, 1.5 Hz, 1H), 6.72–6.62 (m, 2H), 6.20 (s, 1H), 5.46 (s, 1H), 3.29 (d,  $J$  = 6.5 Hz, 2H), 2.25 (td,  $J$  = 7.8, 2.7 Hz, 2H), 1.98 (t,  $J$  = 2.7 Hz, 1H), 1.63–1.54 (m, 3H), 0.97 (s, 6H).  **$^{13}\text{C}$  NMR** (100 MHz,  $\text{CDCl}_3$ ):  $\delta$  169.5, 148.8, 132.4, 127.0, 117.5, 116.8, 116.7, 85.3, 68.5, 48.3, 38.6, 34.9, 25.1, 13.7. **HRMS (ESI)**  $m/z$  calcd for  $\text{C}_{15}\text{H}_{21}\text{N}_2\text{O}$   $[M + H]^+$  245.1648, found 245.1649.

### 2.11. Synthesis of Substrate 1k.

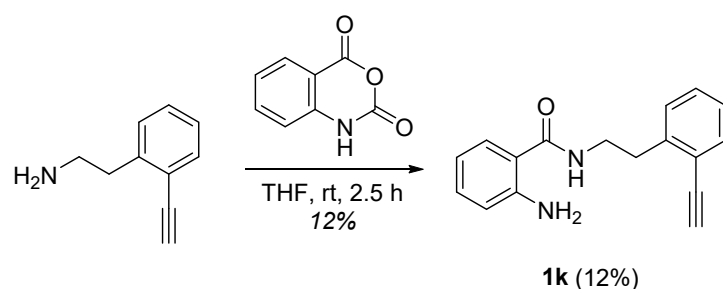

**Scheme S11.** Synthesis of substrate **1k**.

### Synthesis of 2-amino-N-(2-ethynylphenethyl)benzamide (**1k**).

In a 25 mL oven-dried round-bottom flask with a side arm, isatoic anhydride (556 mg, 3.40 mmol) and 2-(2-ethynylphenyl)ethan-1-amine (450 mg, 3.10 mmol) were dissolved in anhydrous THF (16 mL) at 0 °C. The reaction mixture was stirred at room temperature for 2.5 h. Upon completion of the reaction, the reaction mixture was concentrated *in vacuo* and purified by column chromatography (4:1 hexanes/EtOAc) to afford **1k** (97.2 mg, 370  $\mu\text{mol}$ , 12%) as a white solid.

**TLC:**  $R_f$  0.18 (4:1 hexanes/EtOAc). **mp:** 132.1–134.1 °C.  **$^1\text{H}$  NMR** (400 MHz,  $\text{CDCl}_3$ ):  $\delta$  7.55–7.49 (m, 1H), 7.32 (td,  $J$  = 7.5, 1.5 Hz, 1H), 7.25–7.19 (m, 3H), 7.19–7.14 (m, 1H), 6.70–6.57 (m, 2H), 6.13 (s, 1H), 5.49 (s, 2H), 3.77–3.68 (m, 2H), 3.30 (s, 1H), 3.13 (t,  $J$  = 6.7 Hz, 2H).  **$^{13}\text{C}$  NMR** (100 MHz,  $\text{CDCl}_3$ ):  $\delta$  169.5, 148.8, 141.9, 133.3, 132.3, 129.6, 129.4, 127.3, 126.8, 122.0, 117.4, 116.7, 116.4, 82.4, 81.5, 40.5, 34.1. **HRMS (ESI)**  $m/z$  calcd for  $\text{C}_{17}\text{H}_{17}\text{N}_2\text{O}$   $[M + H]^+$  265.1335, found 265.1337.

### 2.12. Synthesis of Substrate 1l.

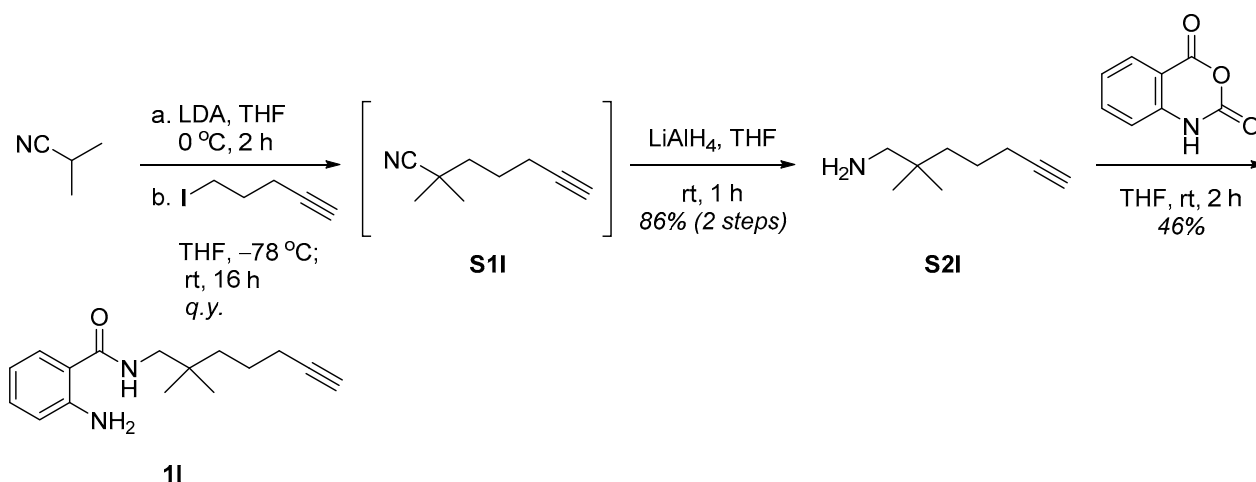



## Scheme S12. Synthesis of substrate 11.

## Synthesis of 2,2-dimethylhept-6-yn-1-amine (S21).

In a 100 mL oven-dried round-bottom flask with a side arm, NaI (8.77 g, 58.5 mmol) and 5-chloro-1-pentyne (3.00 g, 29.3 mmol) were dissolved in anhydrous acetone (29 mL). The reaction mixture was stirred at 80 °C under reflux for 18 h. Upon completion of the reaction, the insoluble NaCl was filtered off and the filtrate was concentrated *in vacuo* to afford crude 5-iodo-1-pentyne (5.68 g, 29.3 mmol, 100%) as dark red liquid. The crude residue was very volatile and used for next reaction without purification.

In a 100 mL oven-dried round-bottom flask with a side arm, *iso*-butyronitrile (1.68 g, 24.3 mmol) was dissolved in anhydrous THF (14.4 mL). LDA solution (14.7 mL, 29.4 mmol, 1.2 equiv. 2.0 M in heptane-THF-ethylbenzene) was added dropwise at 0 °C. After stirred at 0 °C for 2 h, 5-iodo-1-pentyne (5.68 g, 29.3 mmol, 1.2 equiv.) was added dropwise at −78 °C via a syringe and stirred at room temperature for 17 h. Upon completion of the reaction, the reaction mixture was quenched with saturated aqueous NH<sub>4</sub>Cl (80 mL). The aqueous layer was extracted with ether (3 × 120 mL). The combined organic extracts were washed with brine, dried over anhydrous MgSO<sub>4</sub>, filtered, and concentrated *in vacuo* to afford the crude nitrile **S11** as a red oil, which was very volatile and used for the next reaction without purification.

In a 25 mL oven-dried round-bottom flask with a side arm, LiAlH<sub>4</sub> (2.31 g, 61.0 mmol, 2.5 equiv.) was suspended in anhydrous THF (40 mL). A solution of crude nitrile in anhydrous THF (40 mL) was added dropwise at 0 °C. The resulting grey suspension was stirred at room temperature for 1 h. Upon completion of the reaction, the grey suspension was cooled to 0 °C, diluted with ether (45 mL), and quenched by a sequential addition of water (3.0 mL), a 15% aqueous NaOH (3.0 mL), and water (9.0 mL). The white suspension was then dried over anhydrous Na<sub>2</sub>SO<sub>4</sub>, filtered, and concentrated *in vacuo*. The crude residue was purified by column chromatography (10:1 CH<sub>2</sub>Cl<sub>2</sub>/MeOH) to afford amine **S21** (2.91 g, 20.9 mmol, 86%) as a colorless oil. Since the amine **S21** was volatile, it was converted into the corresponding amine salt **S21'** for characterization: HCl solution (80 µL, 320 µmol, 4 M in dioxane) was added to amine **S21** (30.0 mg, 220 µmol). After concentrated, Et<sub>2</sub>O (0.5 mL) was added. The resulting precipitate was filtered off and washed with Et<sub>2</sub>O (10 mL). The amine salt **S21'** was obtained as white solid.

**S21'**: TLC: *R<sub>f</sub>* 0.15 (10:1 CH<sub>2</sub>Cl<sub>2</sub>/MeOH). mp: 80.5–82.5 °C. <sup>1</sup>H NMR (400 MHz, CDCl<sub>3</sub>): δ 8.35 (s, 3H), 2.80 (d, *J* = 5.8 Hz, 2H), 2.22 (td, *J* = 6.6, 2.6 Hz, 2H), 1.96 (t, *J* = 2.6 Hz, 1H), 1.64–1.59 (m, 2H), 1.51–1.43 (m, 2H), 1.08 (s, 6H). <sup>13</sup>C NMR (100 MHz, CDCl<sub>3</sub>): δ 84.2, 68.8, 49.6, 38.9, 33.1, 25.0, 23.1, 19.0. HRMS (ESI) *m/z* calcd for C<sub>9</sub>H<sub>18</sub>N [M]<sup>+</sup> 140.1434, found 140.1435.

## Synthesis of 2-amino-N-(2,2-dimethylhept-6-yn-1-yl)benzamide (11).

In a 25 mL oven-dried round-bottom flask with a side arm, isatoic anhydride (3.91 g, 23.0 mmol, 1.1 equiv.) and amine **S21** (2.91 g, 20.9 mmol) were dissolved in anhydrous THF (115 mL) at 0 °C. The reaction mixture was stirred at room temperature for 2 h. Upon completion of the reaction, the reaction mixture was concentrated *in vacuo* and purified by MPLC (5:1 hexanes/EtOAc) to afford **11** (2.47 g, 9.56 mmol, 46%) as a white solid.

TLC: *R<sub>f</sub>* 0.25 (4:1 hexanes/EtOAc). mp: 79.6–81.6 °C. <sup>1</sup>H NMR (400 MHz, CDCl<sub>3</sub>): δ 7.32 (dd, *J* = 7.8, 1.5 Hz, 1H), 7.21 (ddd, *J* = 8.2, 7.2, 1.5 Hz, 1H), 6.72–6.61 (m, 2H), 6.06 (s, 1H), 5.43 (s, 2H), 3.27 (d, *J* = 6.3 Hz, 2H), 2.20 (td, *J* = 6.9, 2.6 Hz, 2H), 1.94 (t, *J* = 2.6 Hz, 1H), 1.60–1.50 (m, 2H), 1.44–1.35 (m, 2H), 0.96 (s, 6H). <sup>13</sup>C NMR (100 MHz, CDCl<sub>3</sub>): δ 169.5, 148.7, 132.3, 127.1, 117.4, 116.9, 116.7, 84.7, 68.7, 48.8, 39.0, 34.6, 25.3, 23.3, 19.3. HRMS (ESI) *m/z* calcd for C<sub>16</sub>H<sub>23</sub>N<sub>2</sub>O [M + H]<sup>+</sup> 259.1805, found: 259.1806.

## 2.13. Synthesis of Substrate 1m.

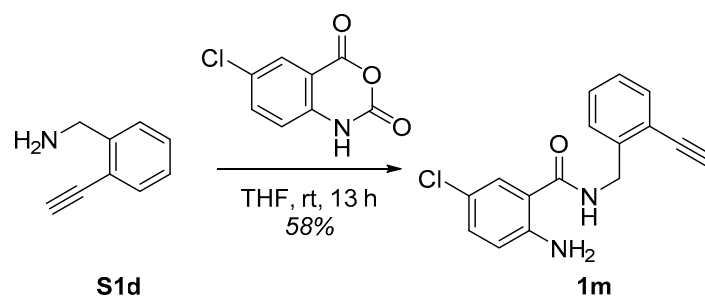

**Scheme S13.** Synthesis of substrate **1m**.

#### Synthesis of 2-amino-5-chloro-N-(2-ethynylbenzyl)benzamide (**1m**).

In a 25 mL oven-dried round-bottom flask with a side arm, 5-chloroisatoic anhydride (431 mg, 2.18 mmol, 1.0 equiv.) and (2-ethynylphenyl)methanamine (**S1d**) (286 mg, 2.18 mmol) were dissolved in anhydrous THF (2.5 mL) at 0 °C. The reaction mixture was stirred at room temperature for 13 h. Upon completion of the reaction, the reaction mixture was concentrated *in vacuo* and purified by MPLC (5:1 hexanes/EtOAc) to afford **1m** (359 mg, 1.26 mmol, 58%) as a white solid.

**TLC:**  $R_f$  0.324:1 hexanes/EtOAc). **mp:** 165.2–166.8 °C. **<sup>1</sup>H NMR** (400 MHz, CDCl<sub>3</sub>):  $\delta$  7.54 (dd,  $J$  = 7.6, 1.4 Hz, 1H), 7.45–7.40 (m, 1H), 7.36 (td,  $J$  = 7.5, 1.5 Hz, 1H), 7.32–7.28 (m, 2H), 7.15 (dd,  $J$  = 8.8, 2.4 Hz, 1H), 6.62 (d,  $J$  = 8.7 Hz, 1H), 6.51 (s, 1H), 5.51 (s, 2H), 4.74 (d,  $J$  = 5.9 Hz, 2H), 3.39 (s, 1H). **<sup>13</sup>C NMR** (100 MHz, CDCl<sub>3</sub>):  $\delta$  167.9, 146.7, 140.4, 133.33, 132.3, 129.5, 128.8, 127.7, 126.9, 121.7, 121.4, 119.0, 117.3, 82.4, 81.7, 42.6. **HRMS (ESI)**  $m/z$  calcd for C<sub>16</sub>H<sub>14</sub>ClN<sub>2</sub>O [M + H]<sup>+</sup> 285.0789, found: 285.0795.

#### 2.14. Synthesis of Substrate **1n**.

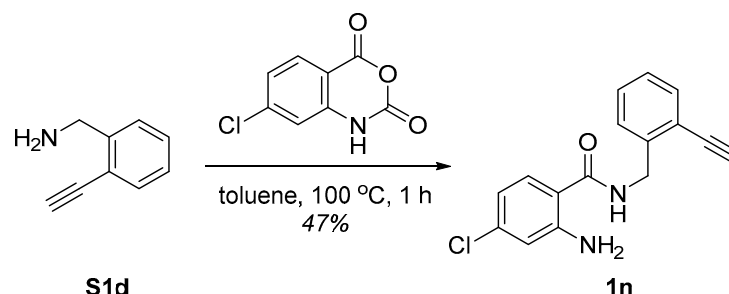

**Scheme S14.** Synthesis of substrate **1n**.

#### Synthesis of 2-amino-4-chloro-N-(2-ethynylbenzyl)benzamide (**1n**).

In a 25 mL oven-dried round-bottom flask with a side arm, 4-chloroisatoic anhydride (549 mg, 2.78 mmol, 1.0 equiv.) and (2-ethynylphenyl)methanamine (**S1d**) (365 mg, 2.78 mmol) were dissolved in anhydrous toluene (2.0 mL). The reaction mixture was stirred at 100 °C for 1 h. Upon completion of the reaction, the reaction mixture was concentrated *in vacuo* and purified by MPLC (7:1 hexanes/EtOAc) to afford **1n** (370 mg, 1.30 mmol, 47%) as a white solid.

**TLC:**  $R_f$  0.30 (5:1 hexanes/EtOAc). **mp:** 112.0–113.7 °C. **<sup>1</sup>H NMR** (400 MHz, CDCl<sub>3</sub>):  $\delta$  7.53 (dd,  $J$  = 7.6, 1.5 Hz, 1H), 7.44–7.39 (m, 1H), 7.35 (td,  $J$  = 7.5, 1.5 Hz, 1H), 7.28 (dd,  $J$  = 7.5, 1.5 Hz, 1H), 7.24 (d,  $J$  = 8.4 Hz, 1H), 6.67 (d,  $J$  = 2.0 Hz, 1H), 6.59 (dd,  $J$  = 8.4, 2.0 Hz, 1H), 6.52 (s, 1H), 5.66 (s, 2H), 4.73 (d,  $J$  = 5.9 Hz, 2H), 3.38 (s, 1H). **<sup>13</sup>C NMR** (100 MHz, CDCl<sub>3</sub>):  $\delta$  168.4, 149.8, 140.6, 138.2, 133.2, 129.5, 128.8, 128.5, 127.7, 121.4, 116.9, 114.39, 82.3, 81.7, 42.5. **HRMS (ESI)**  $m/z$  calcd for C<sub>16</sub>H<sub>14</sub>ClN<sub>2</sub>O [M + H]<sup>+</sup> 285.0789, found: 285.0794.

## 2.15. Synthesis of Substrate 1o.

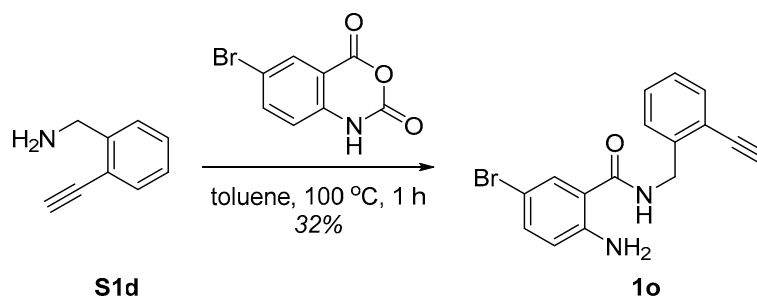

Scheme S15. Synthesis of substrate 1o.

## Synthesis of 2-amino-5-bromo-N-(2-ethynylbenzyl)benzamide (1o).

In a 25 mL oven-dried round-bottom flask with a side arm, 5-bromoisatoic anhydride (581 mg, 2.40 mmol, 1.0 equiv.) and (2-ethynylphenyl)methanamine (**S1d**) (315 mg, 2.40 mmol) were dissolved in anhydrous toluene (2.0 mL). The reaction mixture was stirred at 100 °C for 1 h. Upon completion of the reaction, the reaction mixture was concentrated *in vacuo* and purified by MPLC (5:1 hexanes/EtOAc) to afford **1o** (255 mg, 775  $\mu$ mol, 32%) as a yellow solid.

**TLC:**  $R_f$  0.20 (4:1 hexanes/EtOAc). **mp:** 153.2–154.6 °C.  **$^1\text{H}$  NMR** (400 MHz,  $\text{CDCl}_3$ ):  $\delta$  7.54 (dd,  $J$  = 7.6, 1.4 Hz, 1H), 7.44–7.40 (m, 2H), 7.36 (td,  $J$  = 7.5, 1.5 Hz, 1H), 7.29 (dd,  $J$  = 7.6, 1.7 Hz, 1H), 6.57 (d,  $J$  = 8.7 Hz, 1H), 6.50 (s, 1H), 5.53 (s, 2H), 4.74 (d,  $J$  = 5.8 Hz, 2H), 3.40 (s, 1H).  **$^{13}\text{C}$  NMR** (100 MHz,  $\text{CDCl}_3$ ):  $\delta$  167.9, 147.7, 140.4, 135.1, 133.3, 129.8, 129.4, 128.7, 127.7, 121.4, 119.0, 117.5, 107.9, 82.4, 81.7, 42.5. **HRMS (ESI)**  $m/z$  calcd for  $\text{C}_{16}\text{H}_{14}\text{BrN}_2\text{O}$   $[\text{M} + \text{H}]^+$  329.0284, found: 329.0291.

## 2.16. Synthesis of Substrate 1p.

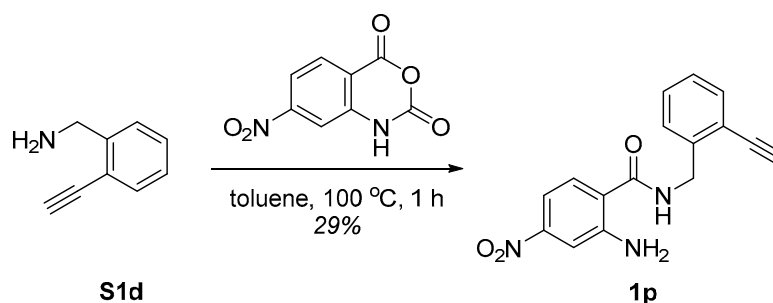

Scheme S16. Synthesis of substrate 1p.

## Synthesis of 2-Amino-N-(2-ethynyl-benzyl)-4-nitro-benzamide (1p).

In a 25 mL oven-dried round-bottom flask with a side arm, 4-nitroisatoic anhydride (365 mg, 1.75 mmol, 1.0 equiv.) and (2-ethynylphenyl)methanamine (**S1d**) (230 mg, 1.75 mmol) were dissolved in anhydrous toluene (2.0 mL). The reaction mixture was stirred at 100 °C for 1 h. Upon completion of the reaction, the reaction mixture was concentrated *in vacuo* and purified by MPLC (7:1 hexanes/EtOAc) to afford **1p** (147 mg, 498  $\mu$ mol, 29%) as a yellow solid.

**TLC:**  $R_f$  0.25 (4:1 hexanes/EtOAc). **mp:** 160.0–161.7 °C.  **$^1\text{H}$  NMR** (400 MHz,  $\text{DMSO}-d_6$ ):  $\delta$  9.08 (t,  $J$  = 5.8 Hz, 1H), 7.79 (d,  $J$  = 8.7 Hz, 1H), 7.59 (d,  $J$  = 2.4 Hz, 1H), 7.49 (dd,  $J$  = 7.6, 1.4 Hz, 1H), 7.39 (td,  $J$  = 7.5, 1.4 Hz, 1H), 7.37–7.24 (m, 3H), 6.86 (s, 2H), 4.59 (d,  $J$  = 5.7 Hz, 2H), 4.48 (s, 1H).  **$^{13}\text{C}$  NMR** (100 MHz,  $\text{DMSO}-d_6$ ):  $\delta$  167.5, 150.2, 149.5, 141.0, 132.29,

129.8, 129.0, 126.9, 126.5, 120.2, 119.4, 110.1, 108.2, 85.7, 81.1, 40.9. **HRMS (ESI)**  $m/z$  calcd for  $C_{16}H_{13}N_3O_3$   $[M + H]^+$  296.1030, found: 296.1031.

### 2.17. Synthesis of Substrate 1q.

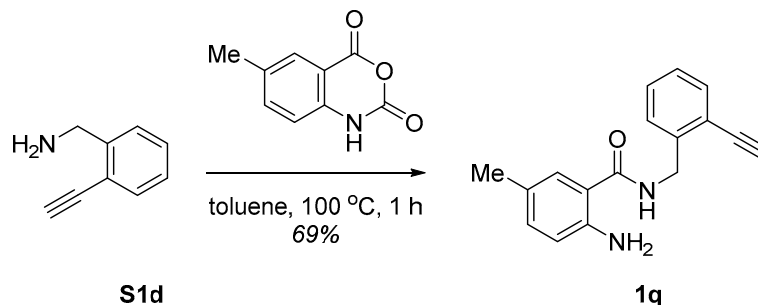

**Scheme S17.** Synthesis of substrate **1q**.

In a 25 mL oven-dried round-bottom flask with a side arm, 5-methylisatoic anhydride (250 mg, 1.40 mmol, 1.0 equiv.) and (2-ethynylphenyl)methanamine (**S1d**) (185 mg, 1.40 mmol) were dissolved in anhydrous toluene (2.0 mL). The reaction mixture was stirred at 100°C for 1 h. Upon completion of the reaction, the reaction mixture was concentrated *in vacuo* and purified by MPLC (4:1 hexanes/EtOAc) to afford **1q** (256 mg, 968  $\mu$ mol, 69%) as a white solid.

**TLC:**  $R_f$  0.45 (2:1 hexanes/EtOAc). **mp:** 136.0–137.4 °C.  **$^1\text{H}$  NMR** (400 MHz,  $\text{CDCl}_3$ ):  $\delta$  7.51 (dd,  $J$  = 7.7, 1.5 Hz, 1H), 7.40 (dd,  $J$  = 7.7, 1.4 Hz, 1H), 7.32 (td,  $J$  = 7.6, 1.4 Hz, 1H), 7.24 (td,  $J$  = 7.5, 1.4 Hz, 1H), 7.12 (s, 1H), 7.00 (dd,  $J$  = 8.2, 2.0 Hz, 1H), 6.64 (s, 1H), 6.58 (d,  $J$  = 8.2 Hz, 1H), 5.31 (s, 2H), 4.73 (d,  $J$  = 5.9 Hz, 2H), 3.37 (s, 1H), 2.20 (s, 3H).  **$^{13}\text{C}$  NMR** (100 MHz,  $\text{CDCl}_3$ ):  $\delta$  169.1, 145.5, 140.8, 133.3, 133.1, 129.4, 128.6, 127.5, 127.4, 126.6, 121.3, 118.0, 116.6, 82.3, 81.7, 42.3, 20.5. **HRMS (ESI)**  $m/z$  calcd for  $C_{17}H_{17}N_2O$   $[M + H]^+$  265.1335, found: 265.1337.

### 2.18. Synthesis of Substrate 1r.

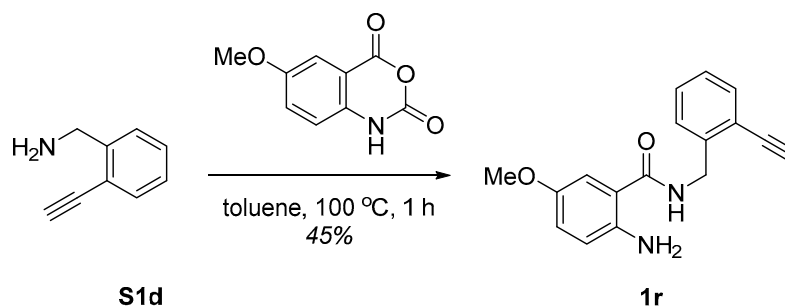

**Scheme S18.** Synthesis of substrate **1r**.

### Synthesis of 2-amino-N-(2-ethynylbenzyl)-5-methoxybenzamide (1r).

In a 25 mL oven-dried round-bottom flask with a side arm, 5-methoxyisatoic anhydride (490 mg, 2.54 mmol, 1.0 equiv.) and (2-ethynylphenyl)methanamine (**S1d**) (333 mg, 2.54 mmol) were dissolved in anhydrous toluene (2.0 mL). The reaction mixture was stirred at 100°C for 1 h. Upon completion of the reaction, the reaction mixture was concentrated *in vacuo* and purified by MPLC (5:1 hexanes/EtOAc) to afford **1r** (323 mg, 1.15 mmol, 45%) as a white solid.

**TLC:**  $R_f$  0.20 (5:1 hexanes/EtOAc). **mp:** 106.9–108.8 °C.  **$^1\text{H}$  NMR** (400 MHz,  $\text{CDCl}_3$ ):  $\delta$  7.53 (dd,  $J$  = 7.6, 1.5 Hz, 1H), 7.43 (ddd,  $J$  = 7.6, 1.4, 0.6 Hz, 1H), 7.35 (td,  $J$  = 7.6, 1.5 Hz, 1H),

7.28 (dd,  $J = 7.5, 1.4$  Hz, 1H), 7.25 (d,  $J = 1.5$  Hz, 4H), 6.91 (d,  $J = 2.8$  Hz, 1H), 6.87 (dd,  $J = 8.8, 2.9$  Hz, 1H), 6.66 (dd,  $J = 8.7, 0.5$  Hz, 2H), 4.75 (d,  $J = 5.9$  Hz, 2H), 3.74 (s, 3H), 3.38 (s, 1H).  $^{13}\text{C}$  NMR (100 MHz,  $\text{CDCl}_3$ ):  $\delta$  168.7, 151.3, 142.4, 140.7, 133.1, 129.4, 128.6, 127.5, 121.3, 119.3, 118.9, 117.4, 112.3, 82.2, 81.7, 56.0, 42.4. **HRMS (ESI)**  $m/z$  calcd for  $\text{C}_{17}\text{H}_{16}\text{N}_2\text{NaO}_2$   $[\text{M} + \text{Na}]^+$  303.1104, found: 303.1102.

### 2.19. Synthesis of Substrate 1s.

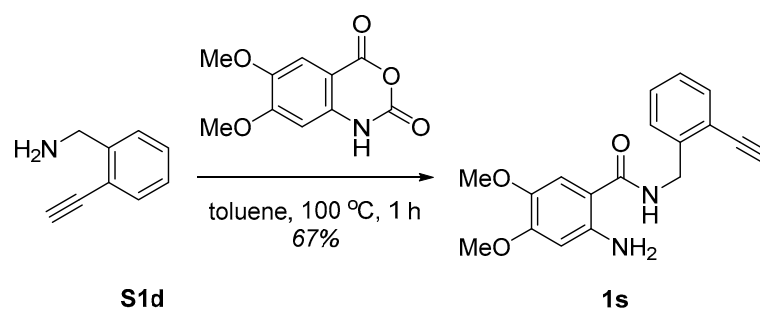

**Scheme S19.** Synthesis of substrate **1s**.

### Synthesis of 2-amino-N-(2-ethynylbenzyl)-4,5-dimethoxybenzamide (**1s**).

In a 25 mL oven-dried round-bottom flask with a side arm, 4,5-dimethoxyisatoic anhydride (147 mg, 661  $\mu\text{mol}$ , 1.0 equiv.) and (2-ethynylphenyl)methanamine (**S1d**) (86.7 mg, 661  $\mu\text{mol}$ ) were dissolved in anhydrous toluene (2.0 mL). The reaction mixture was stirred at 100°C for 1 h. Upon completion of the reaction, the reaction mixture was concentrated *in vacuo* and purified by MPLC (2:1 hexanes/EtOAc) to afford **1s** (138 mg, 445  $\mu\text{mol}$ , 67%) as a brown solid.

**TLC:**  $R_f$  0.35 (2:1 hexanes/EtOAc). **mp:** 119.3–120.8 °C.  $^1\text{H}$  NMR (400 MHz,  $\text{CDCl}_3$ ):  $\delta$  7.52 (dd,  $J = 7.6, 1.5$  Hz, 1H), 7.41 (dd,  $J = 7.7, 1.4$  Hz, 1H), 7.33 (td,  $J = 7.5, 1.5$  Hz, 1H), 7.25 (td,  $J = 8.9, 7.9, 1.4$  Hz, 1H), 6.87 (s, 1H), 6.66 (s, 1H), 6.19 (s, 1H), 5.41 (s, 2H), 4.73 (d,  $J = 5.9$  Hz, 2H), 3.84 (s, 3H), 3.79 (s, 3H), 3.38 (s, 1H).  $^{13}\text{C}$  NMR (100 MHz,  $\text{CDCl}_3$ ):  $\delta$  168.6, 153.4, 144.8, 141.0, 140.9, 133.1, 129.3, 128.6, 127.4, 121.2, 111.0, 107.1, 104.6, 100.8, 82.0, 57.0, 55.7, 42.3. **HRMS (ESI)**  $m/z$  calcd for  $\text{C}_{18}\text{H}_{19}\text{N}_2\text{O}_3$   $[\text{M} + \text{H}]^+$  311.1390, found: 311.1398.

### 2.20. Synthesis of Substrate 1t.

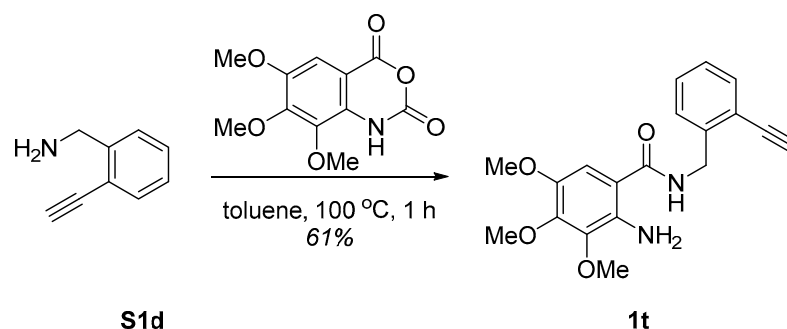

**Scheme S20.** Synthesis of substrate **1t**.

### Synthesis of 2-amino-N-(2-ethynylbenzyl)-3,4,5-trimethoxybenzamide (**1t**).

In a 25 mL oven-dried round-bottom flask with a side arm, 3,4,5-trimethoxyisatoic anhydride (483 mg, 1.90 mmol, 1.0 equiv.) and (2-ethynylphenyl)methanamine (**S1d**) (250 mg, 1.90 mmol) were dissolved in anhydrous toluene (2.0 mL). The reaction mixture was

stirred at 100°C for 1 h. Upon completion of the reaction, the reaction mixture was concentrated *in vacuo* and purified by MPLC (2:1 hexanes/EtOAc) to afford **1t** (397 mg, 1.17 mmol, 61%) as a white solid.

**TLC:**  $R_f$  0.35 (2:1 hexanes/EtOAc). **mp:** 118.0–119.6 °C. **<sup>1</sup>H NMR** (400 MHz, CDCl<sub>3</sub>): δ 7.50 (dd,  $J$  = 7.6, 1.5 Hz, 1H), 7.39 (ddd,  $J$  = 7.7, 1.4, 0.6 Hz, 1H), 7.31 (td,  $J$  = 7.6, 1.5 Hz, 1H), 7.23 (td,  $J$  = 7.5, 1.4 Hz, 1H), 6.87 (s, 1H), 6.76 (s, 1H), 4.71 (d,  $J$  = 5.9 Hz, 2H), 3.90 (s, 3H), 3.85 (s, 3H), 3.77 (s, 3H), 3.37 (s, 1H). **<sup>13</sup>C NMR** (100 MHz, CDCl<sub>3</sub>): δ 168.4, 146.0, 144.7, 141.7, 140.9, 137.2, 133.1, 129.4, 128.6, 127.4, 121.2, 111.3, 106.7, 82.2, 81.85, 60.9, 60.5, 57.1, 42.4. **HRMS (ESI)**  $m/z$  calcd for C<sub>19</sub>H<sub>21</sub>N<sub>2</sub>O<sub>4</sub> [M + H]<sup>+</sup> 341.1496, found: 341.1501.

### 2.21. Synthesis of Substrate 1u.

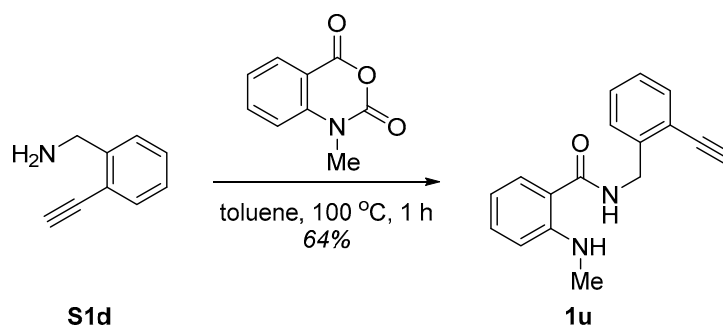

**Scheme S21.** Synthesis of substrate **1u**.

### Synthesis of N-(2-ethynylbenzyl)-2-(methylamino)benzamide (**1u**).

In a 25 mL oven-dried round-bottom flask with a side arm, N-methylisatoic (446 mg, 2.52 mmol, 1.0 equiv.) and (2-ethynylphenyl)methanamine (**S1d**) (330 mg, 2.52 mmol) were dissolved in anhydrous toluene (2.0 mL). The reaction mixture was stirred at 100°C for 1 h. Upon completion of the reaction, the reaction mixture was concentrated *in vacuo* and purified by MPLC (10:1 hexanes/EtOAc) to afford **1u** (426 mg, 1.61 mmol, 64%) as a white solid.

**TLC:**  $R_f$  0.20 (5:1 hexanes/EtOAc). **mp:** 112.0–113.7 °C. **<sup>1</sup>H NMR** (400 MHz, CDCl<sub>3</sub>): δ 7.53 (dd,  $J$  = 7.7, 1.4 Hz, 1H), 7.42 (ddd,  $J$  = 7.6, 1.4, 0.6 Hz, 1H), 7.34 (dtd,  $J$  = 8.6, 4.7, 1.6 Hz, 2H), 7.31–7.23 (m, 2H), 6.66 (d,  $J$  = 7.8 Hz, 1H), 6.57 (td,  $J$  = 7.6, 1.1 Hz, 1H), 4.74 (d,  $J$  = 5.9 Hz, 2H), 3.37 (s, 1H), 2.86 (d,  $J$  = 5.1 Hz, 2H), 1.56 (s, 3H). **<sup>13</sup>C NMR** (100 MHz, CDCl<sub>3</sub>): δ 169.7, 150.7, 140.8, 133.1, 133.0, 129.3, 128.5, 127.4, 127.3, 121.2, 114.8, 114.5, 111.1, 82.2, 81.7, 42.3, 29.7. **HRMS (ESI)**  $m/z$  calcd for C<sub>17</sub>H<sub>17</sub>N<sub>2</sub>O [M + H]<sup>+</sup> 265.1335, found: 265.1340.

### 3. $^1\text{H}$ and $^{13}\text{C}$ NMR spectra

#### 3.1. Spectra of Substrates

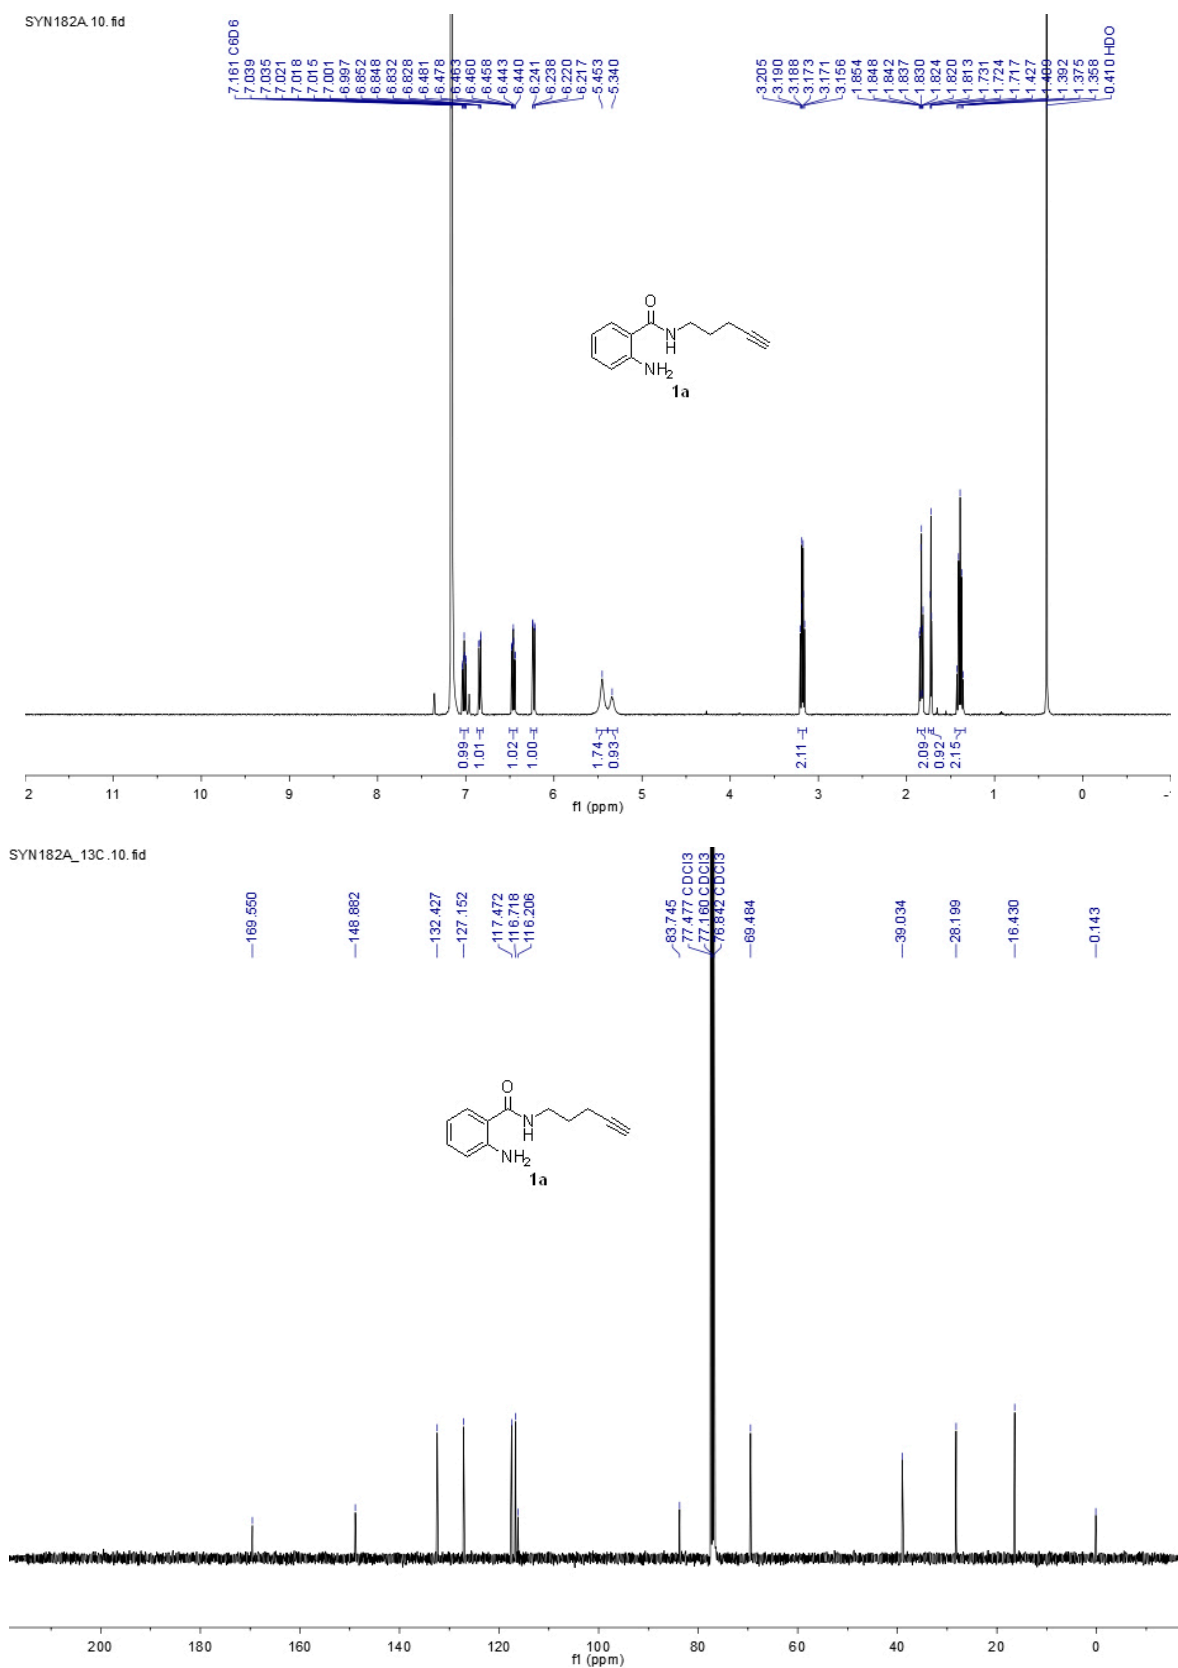

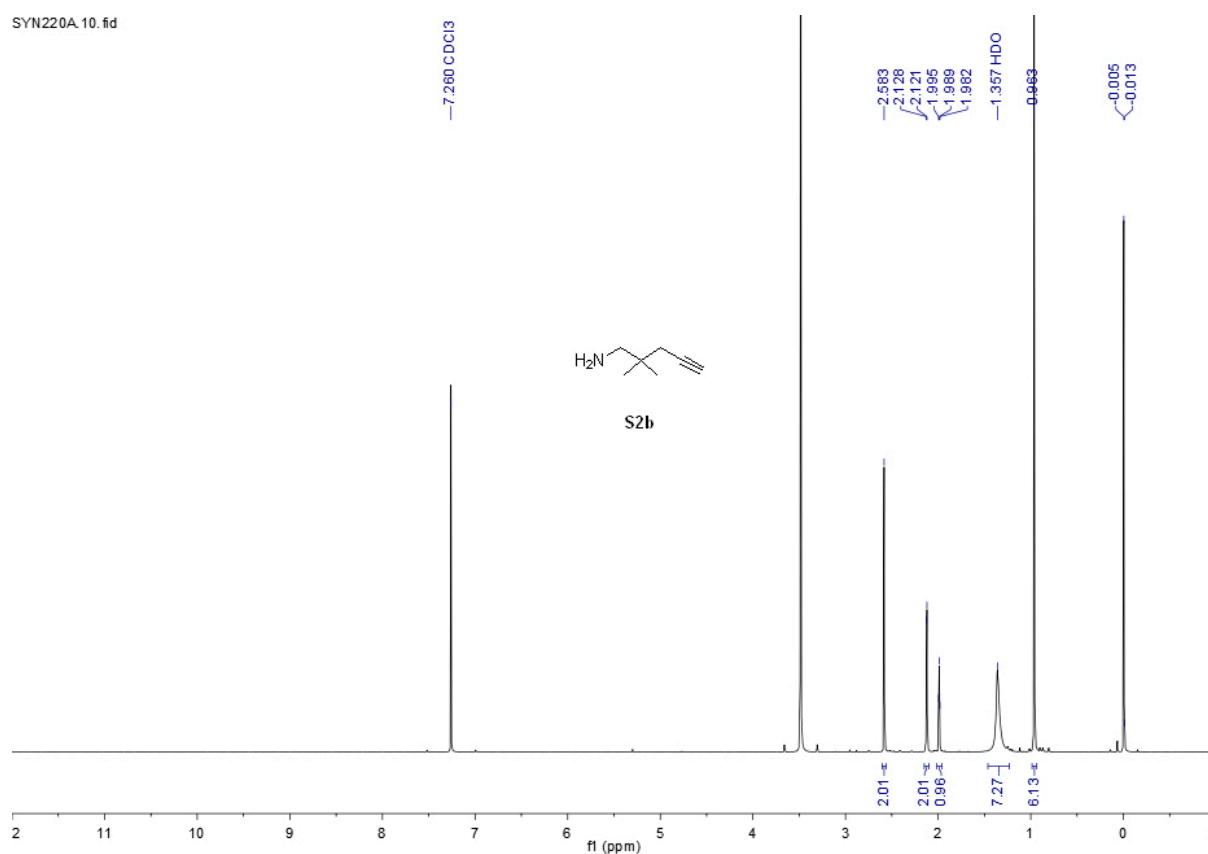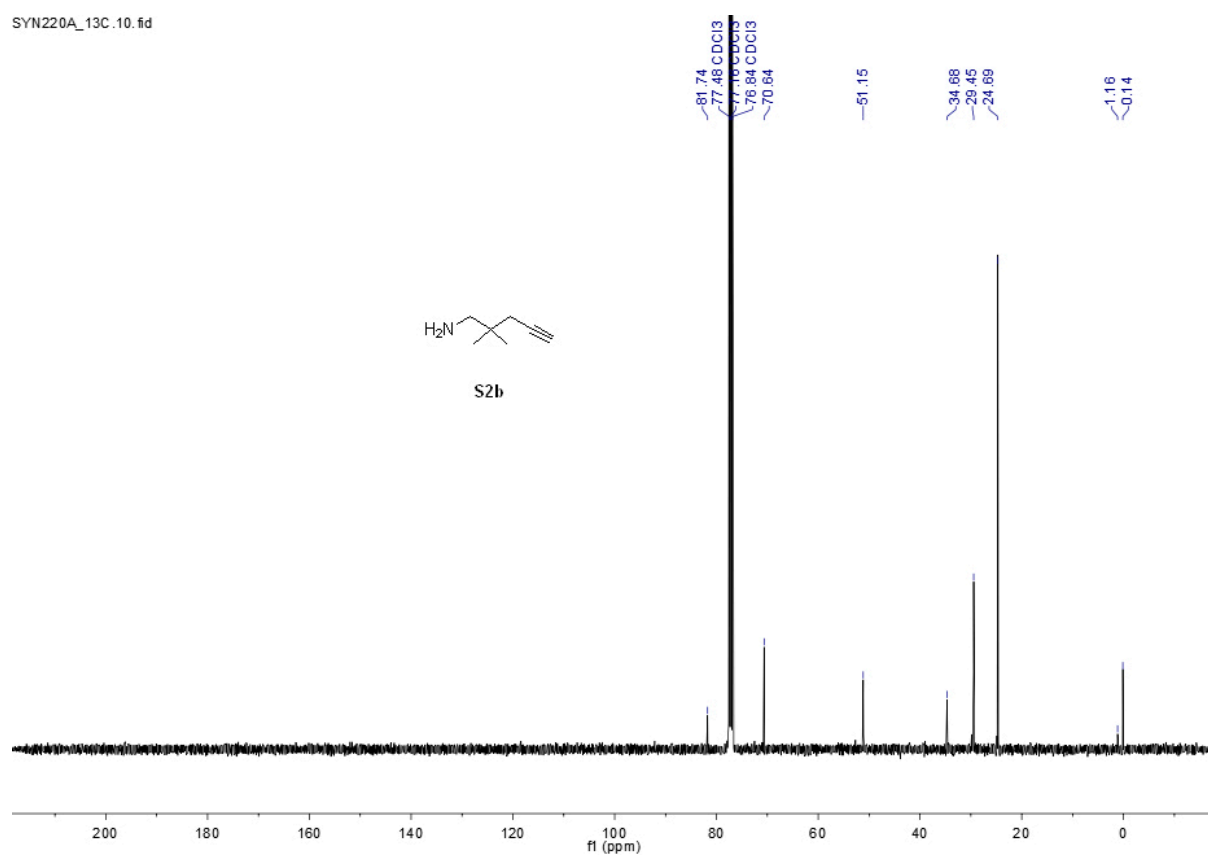



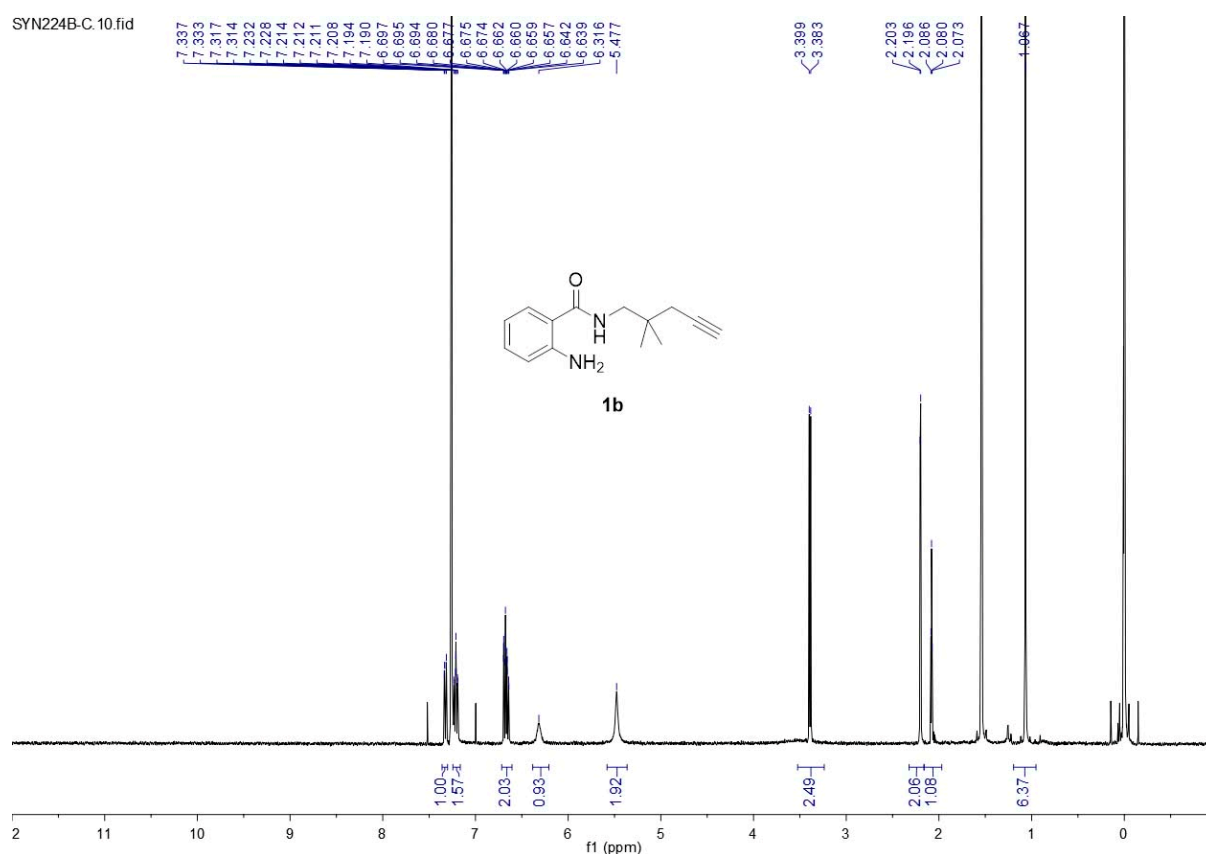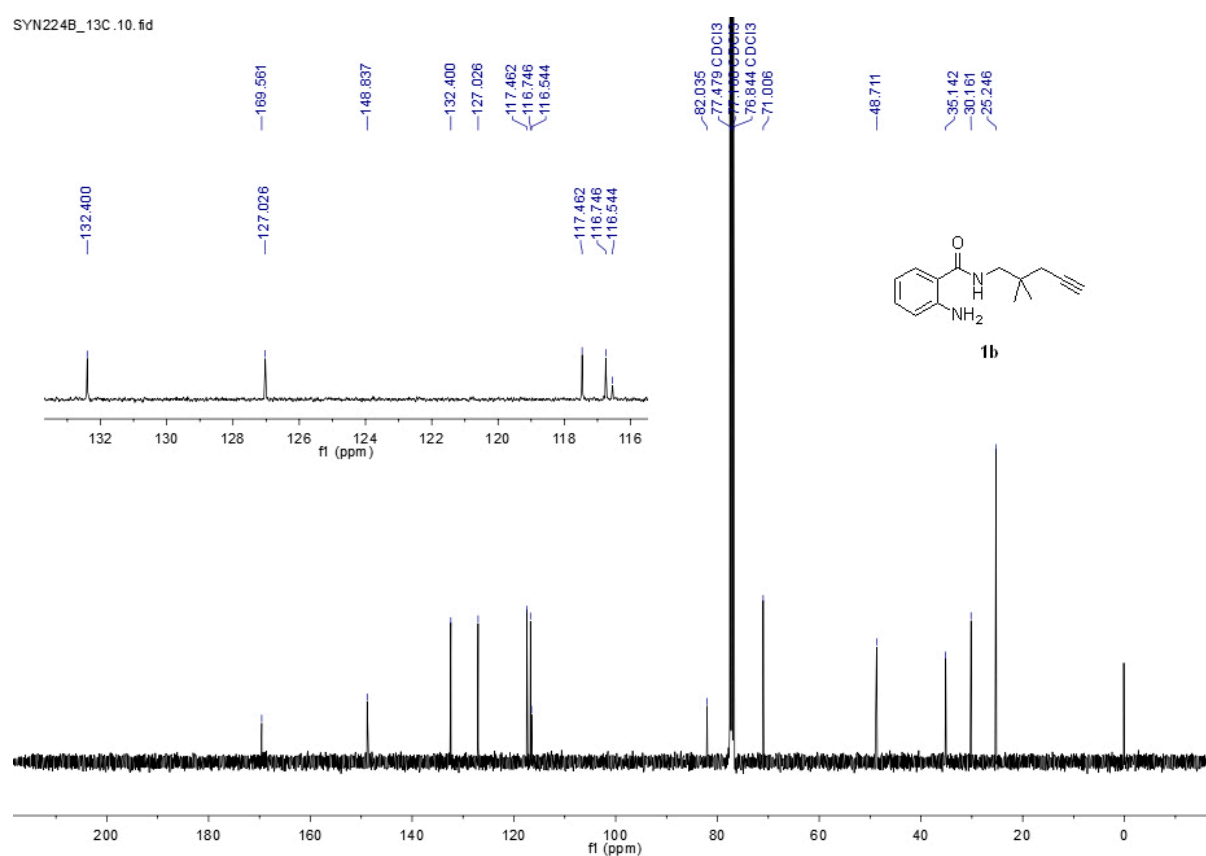

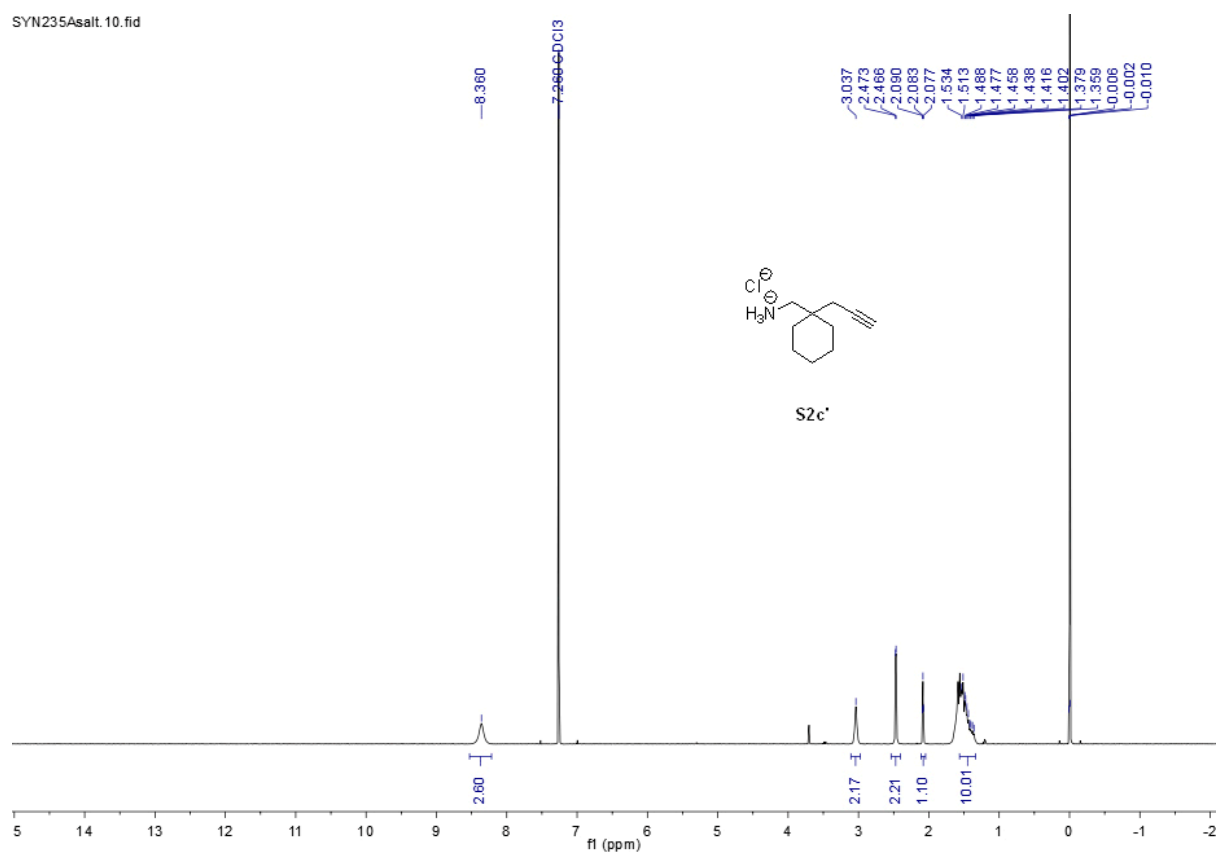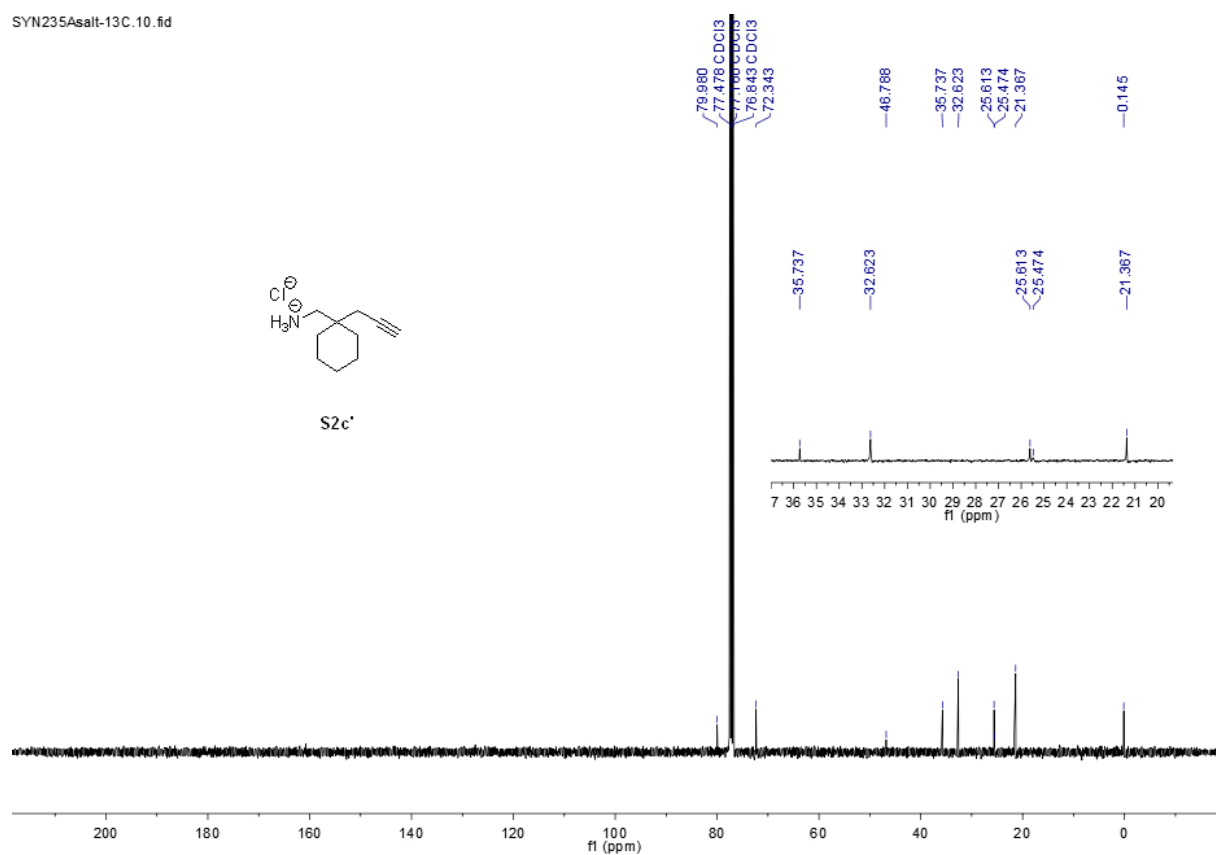

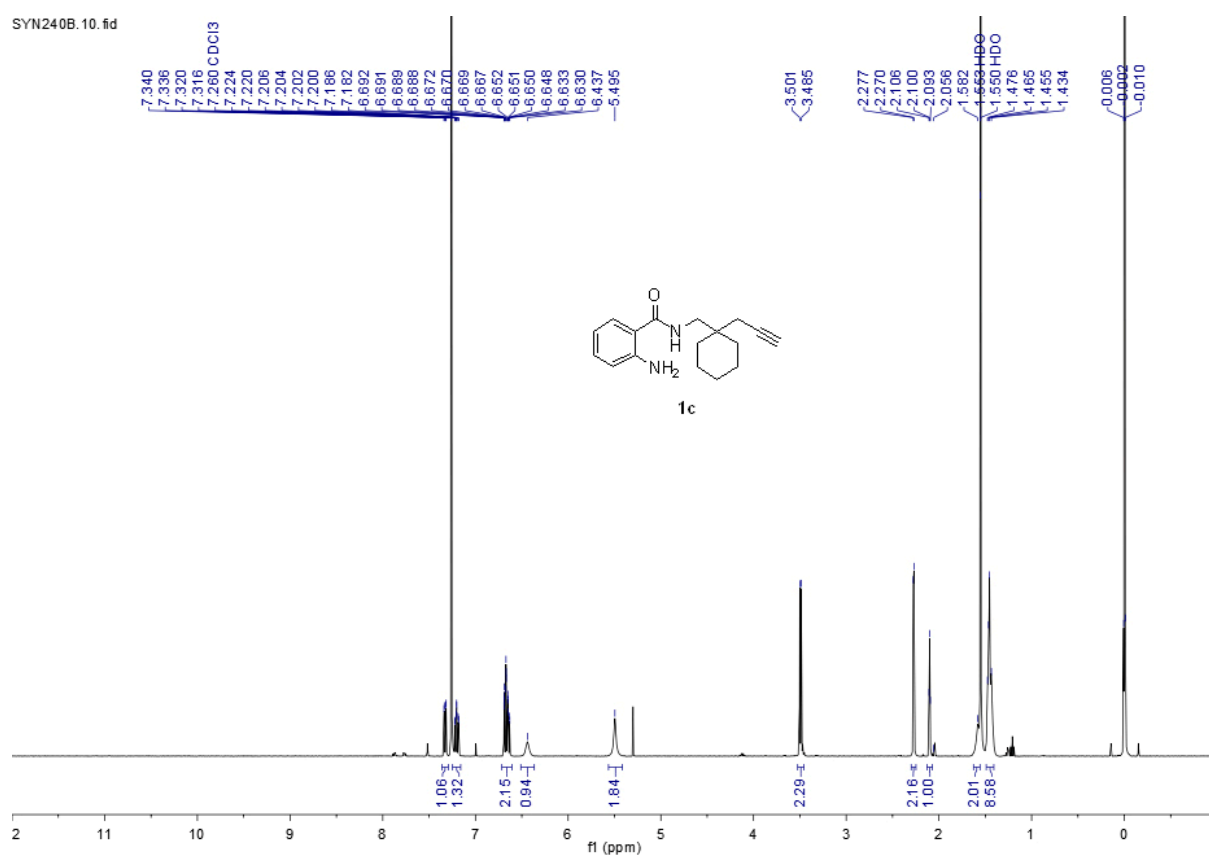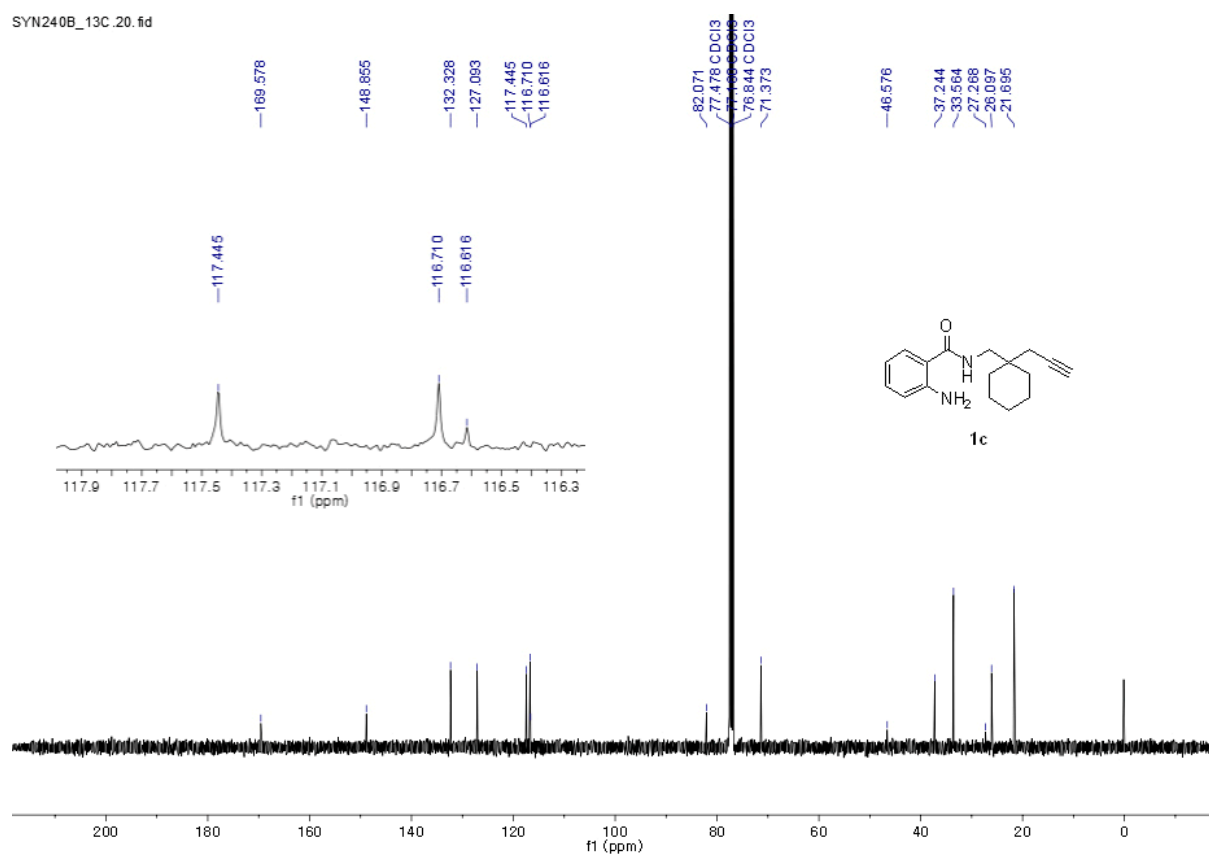

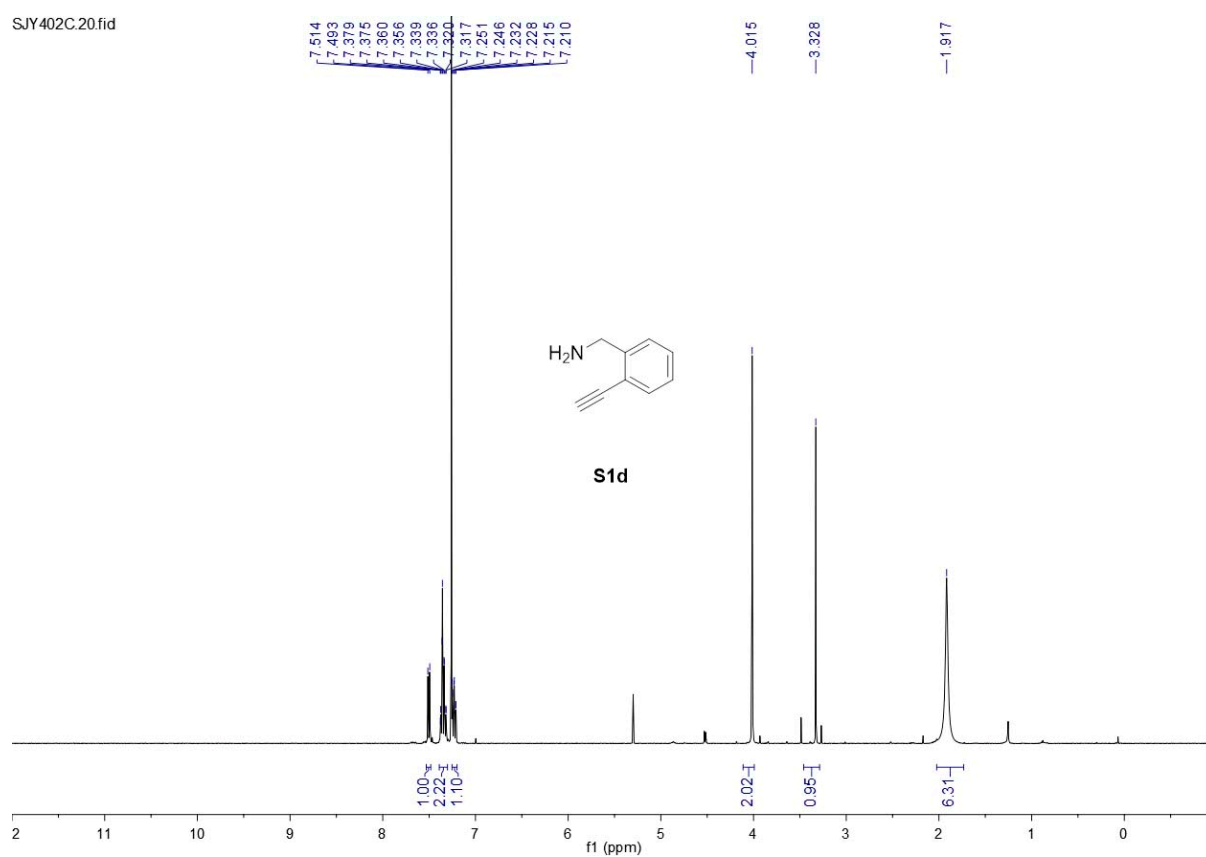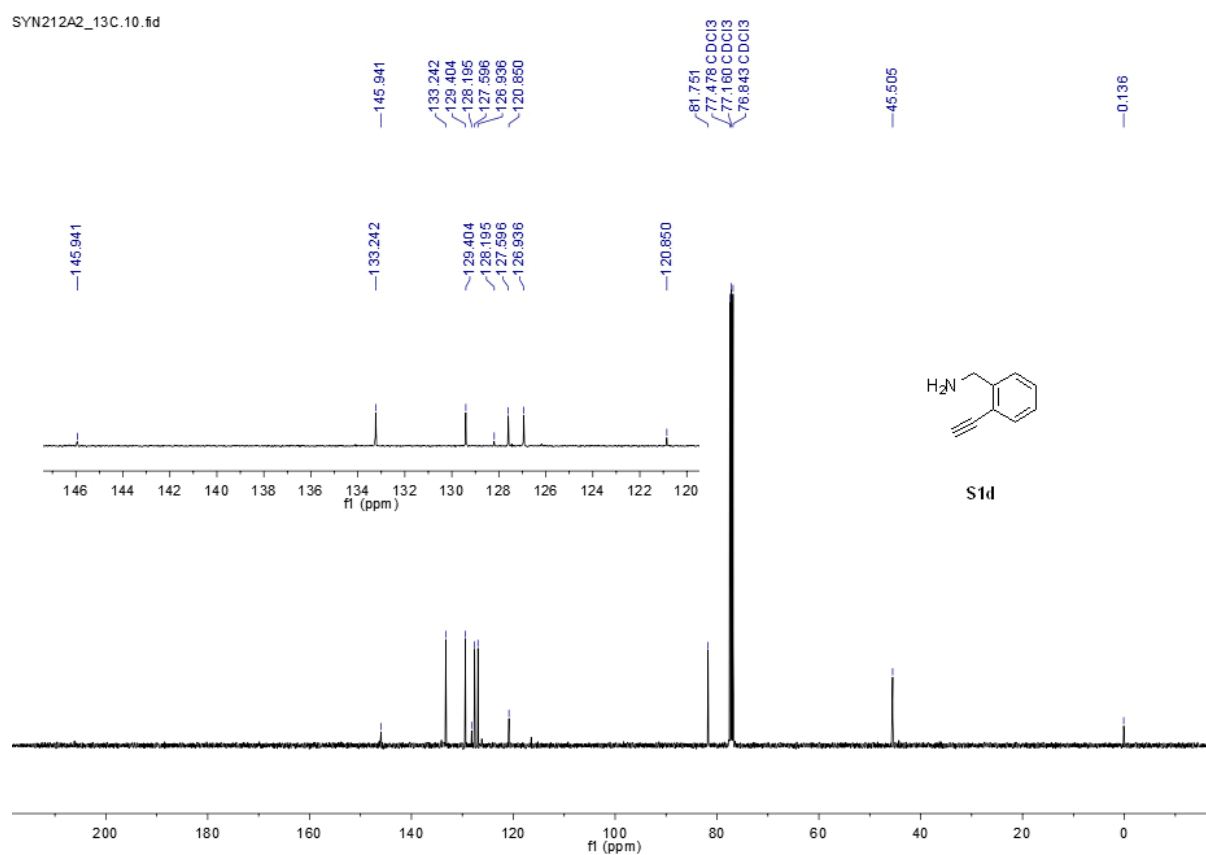

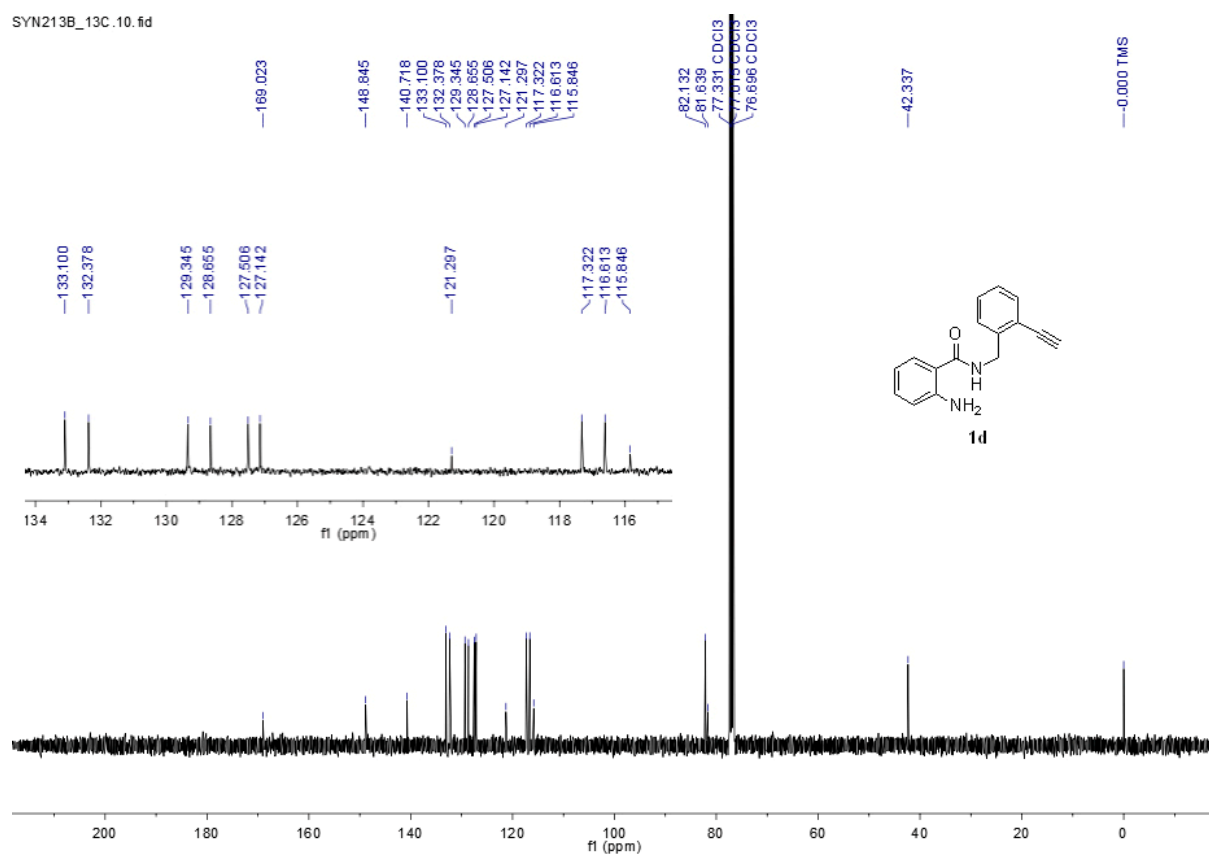

SYN227Bsalt-ACN.10.fid

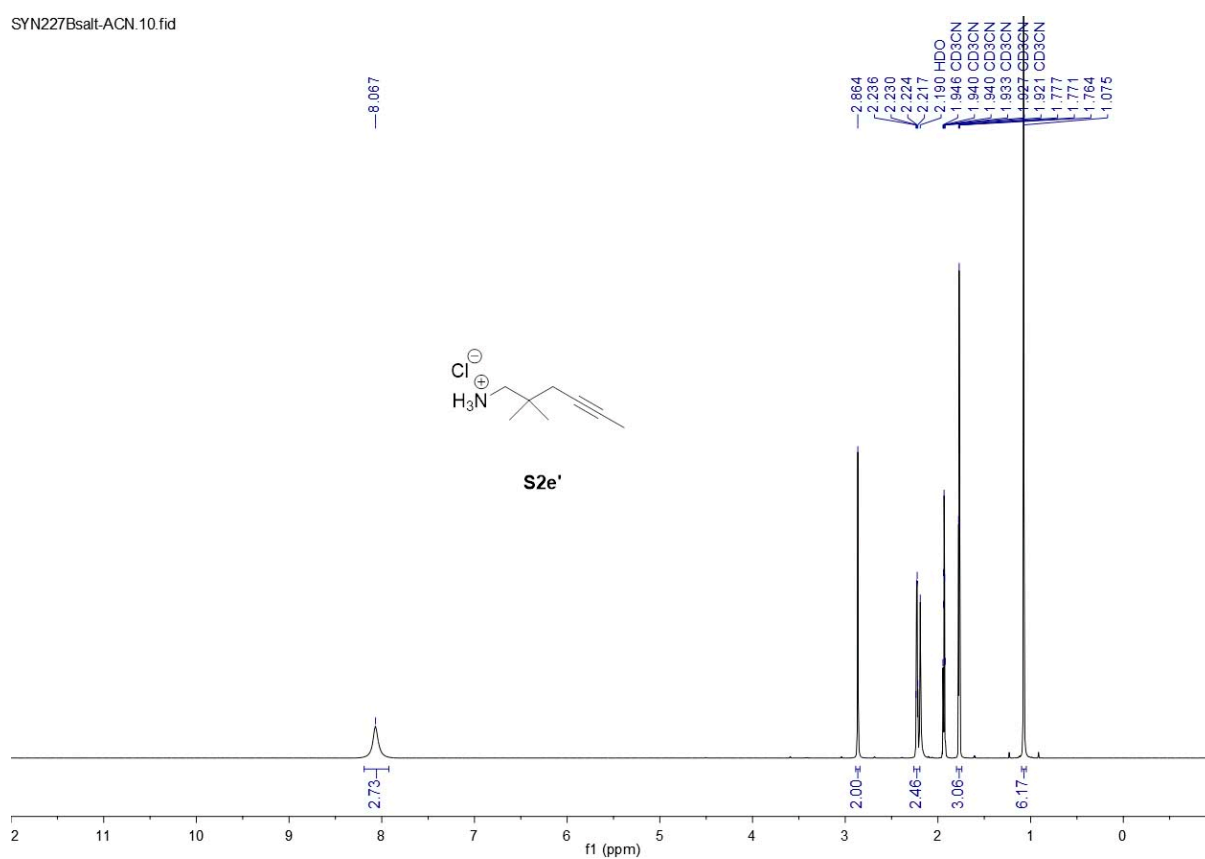

SYN227Bsalt-ACN-13C.10.fid

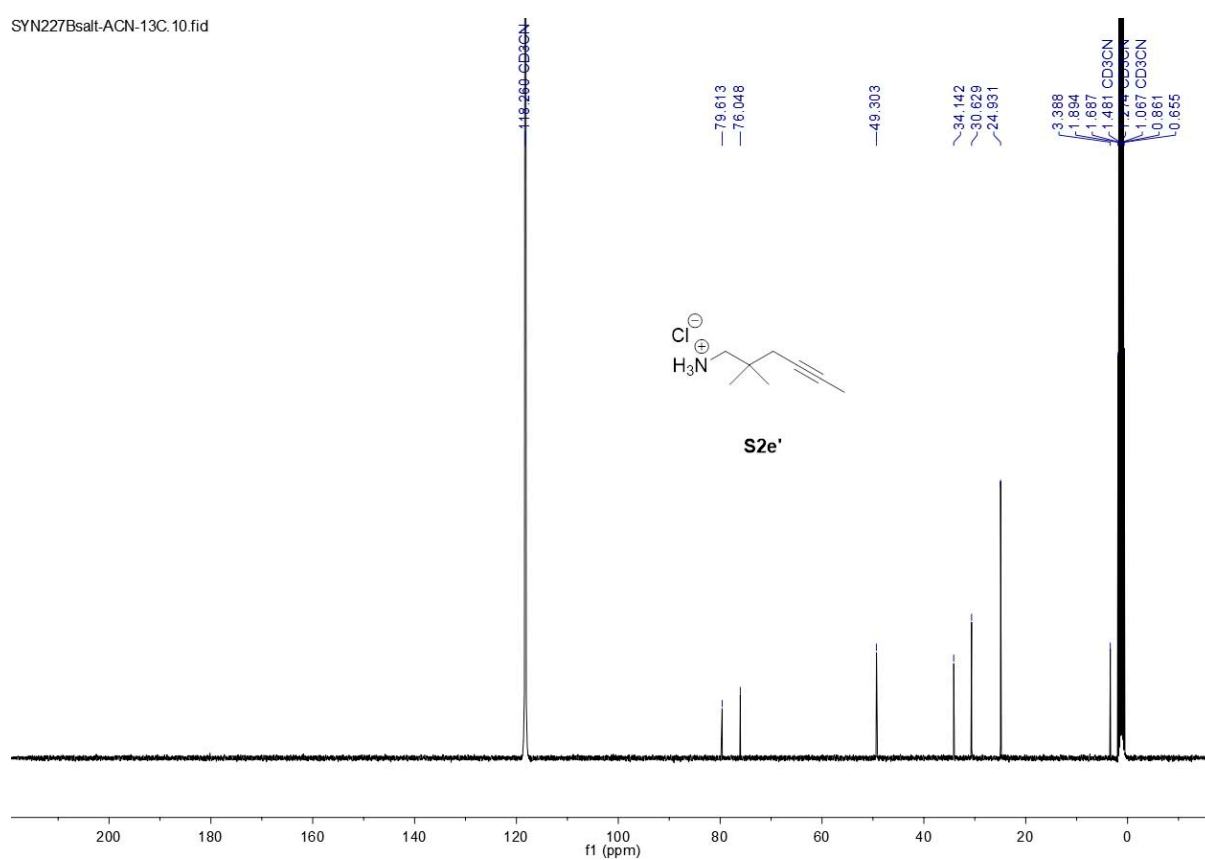

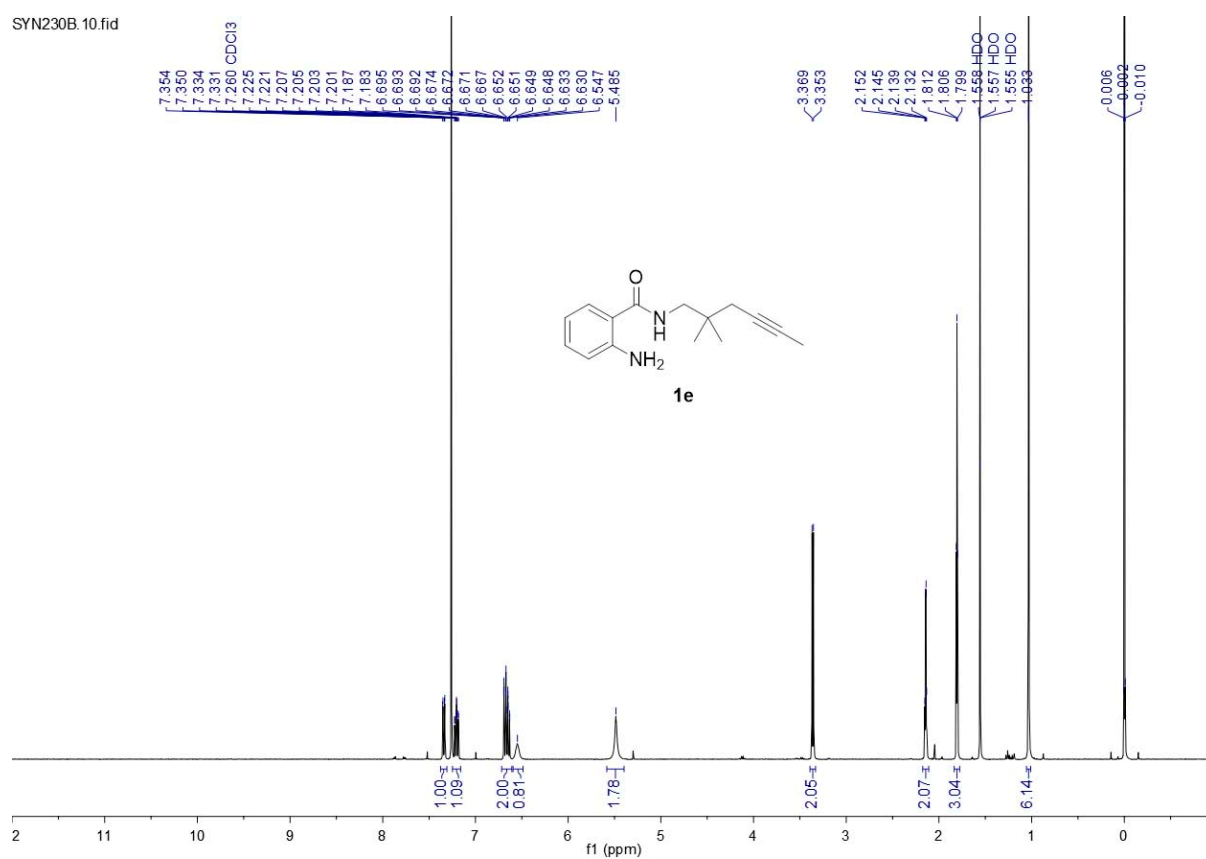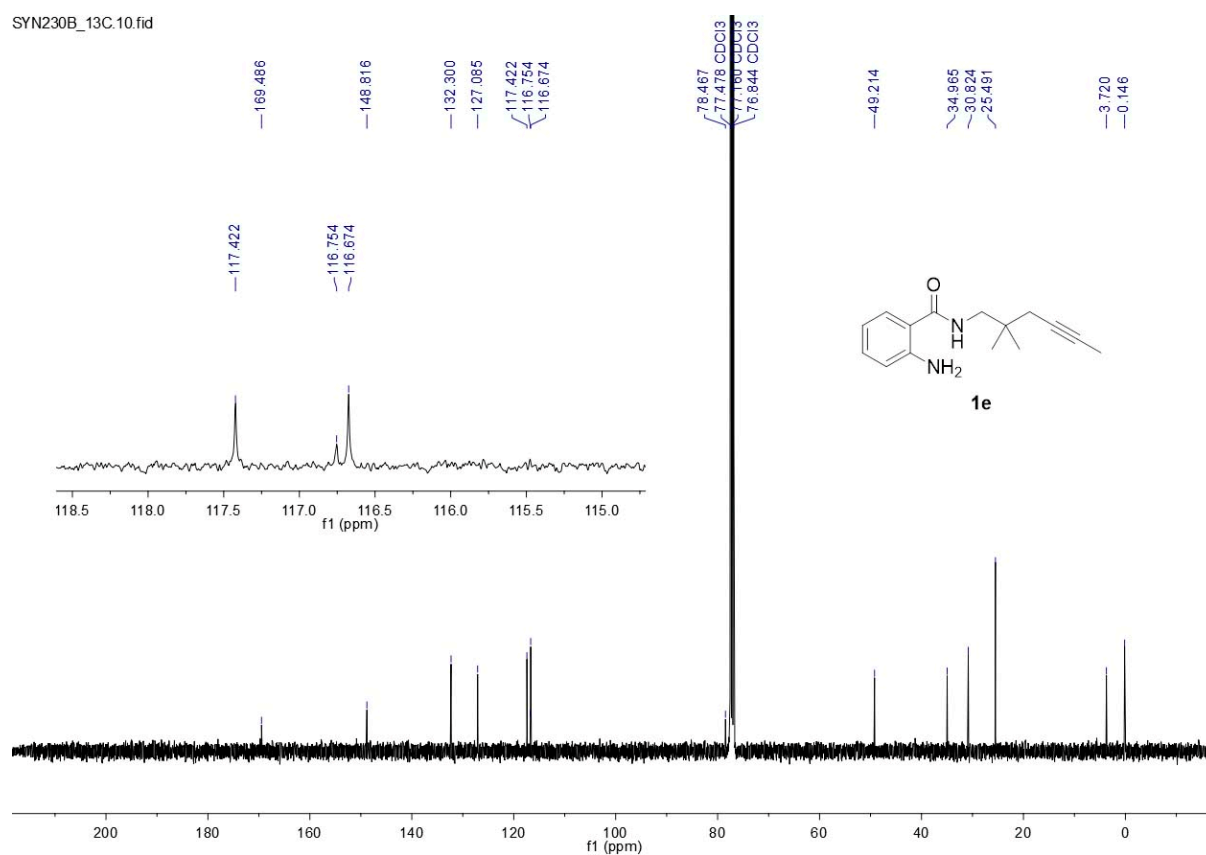

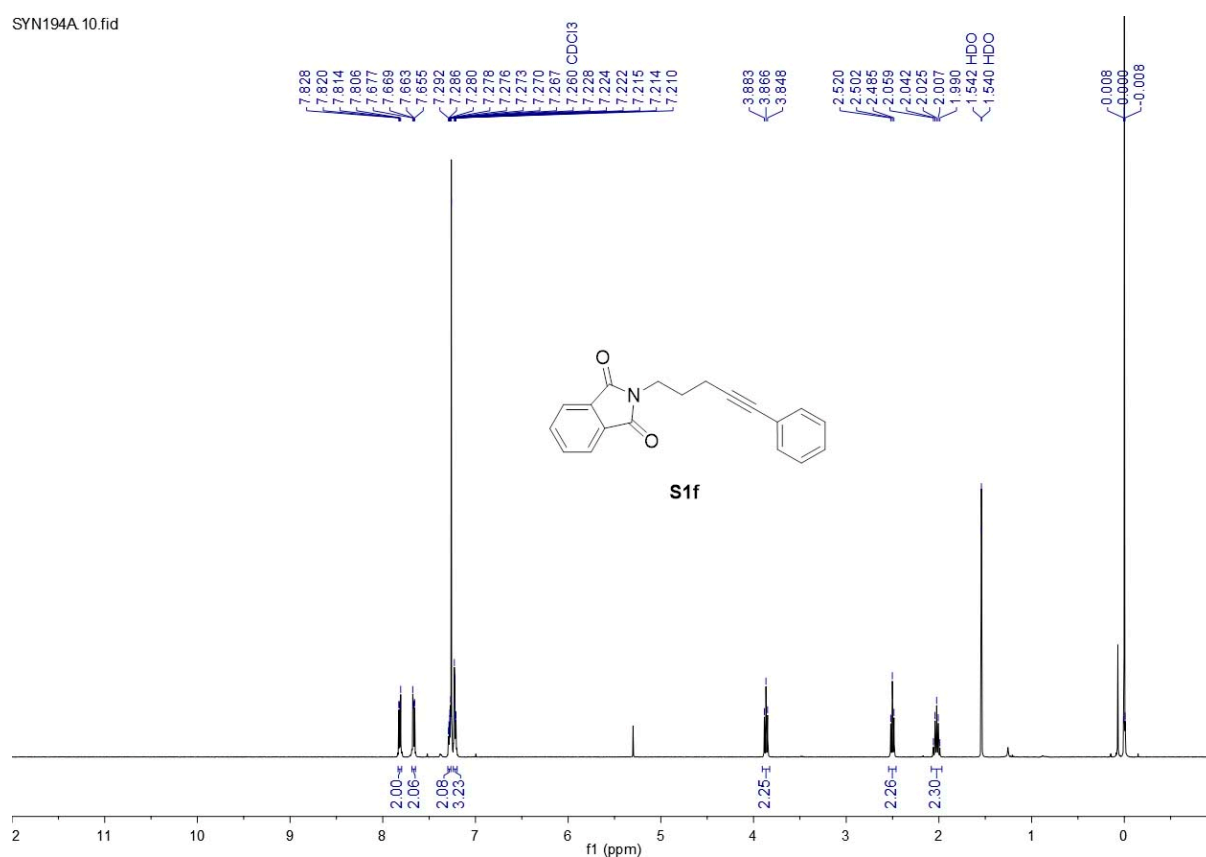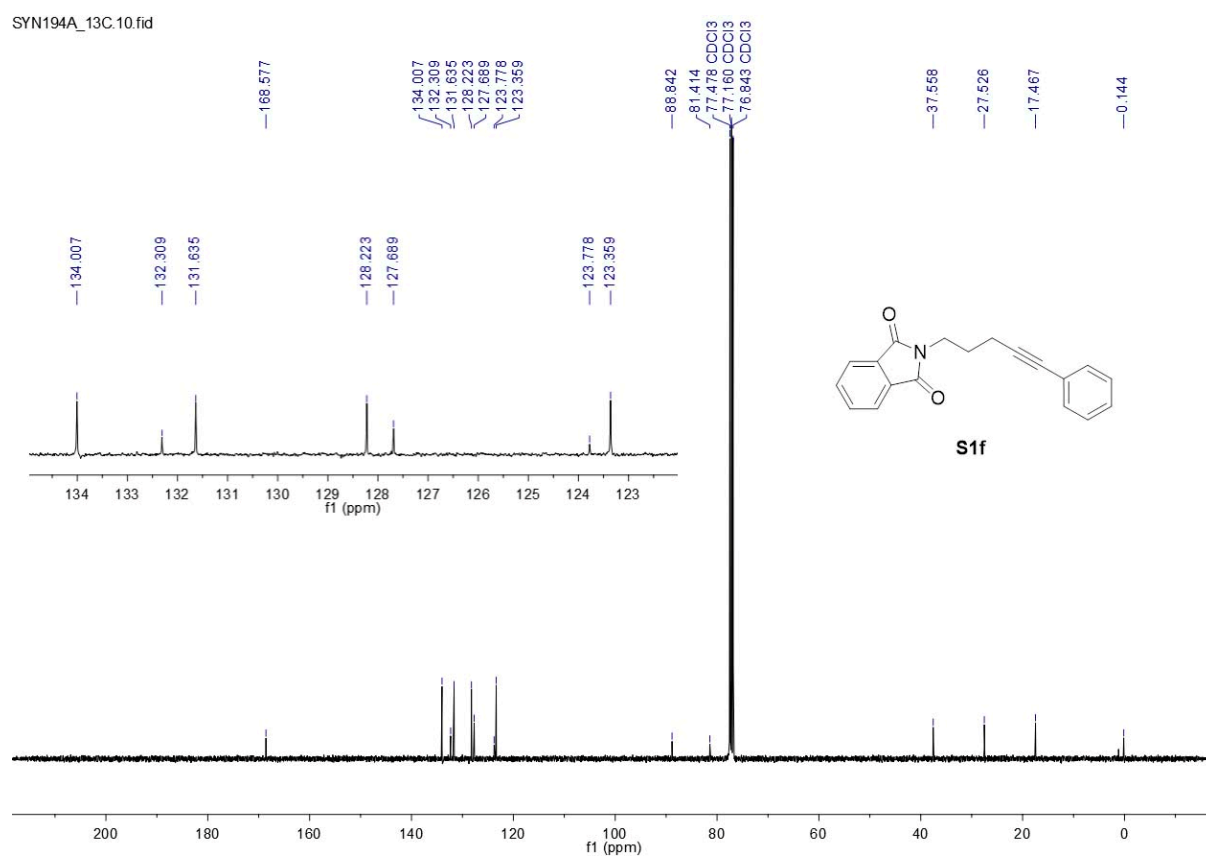



SYN201CR.10.fid

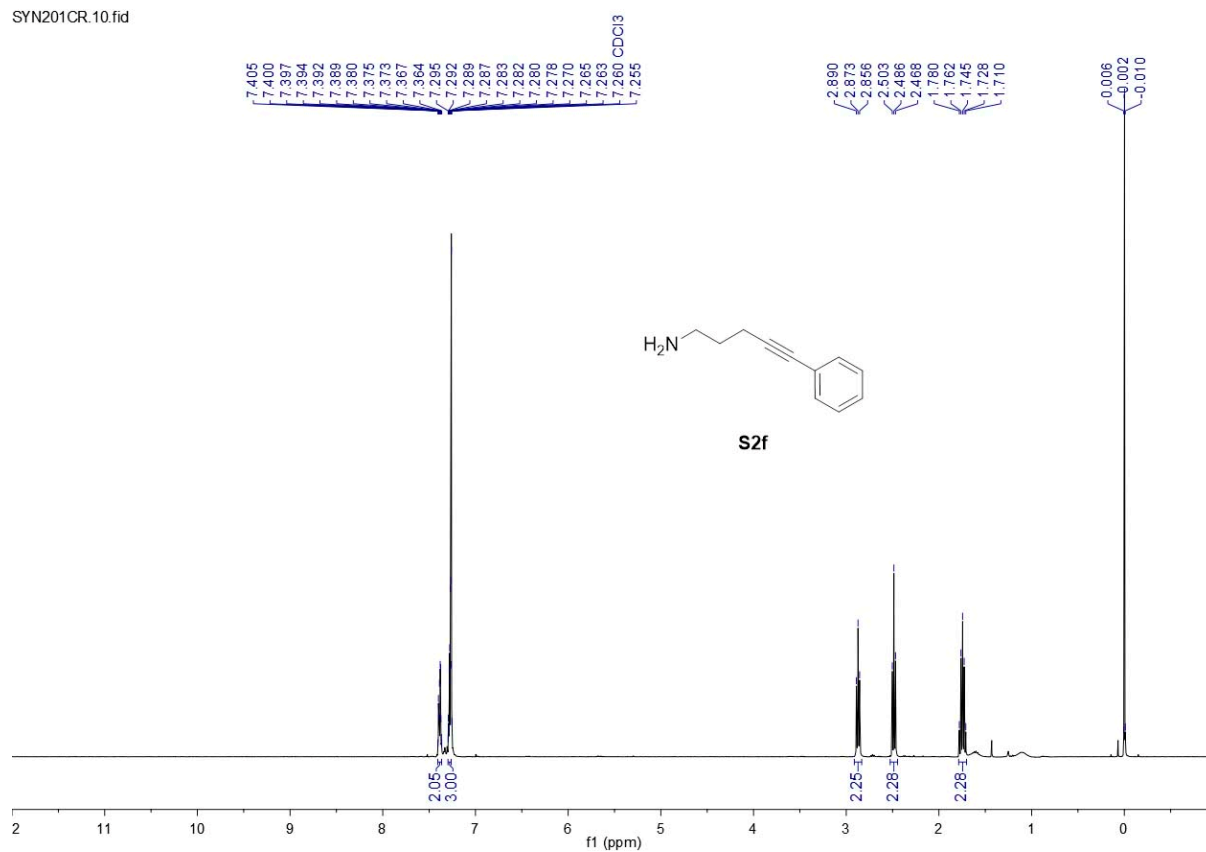

SYN201CR-13C.10.fid

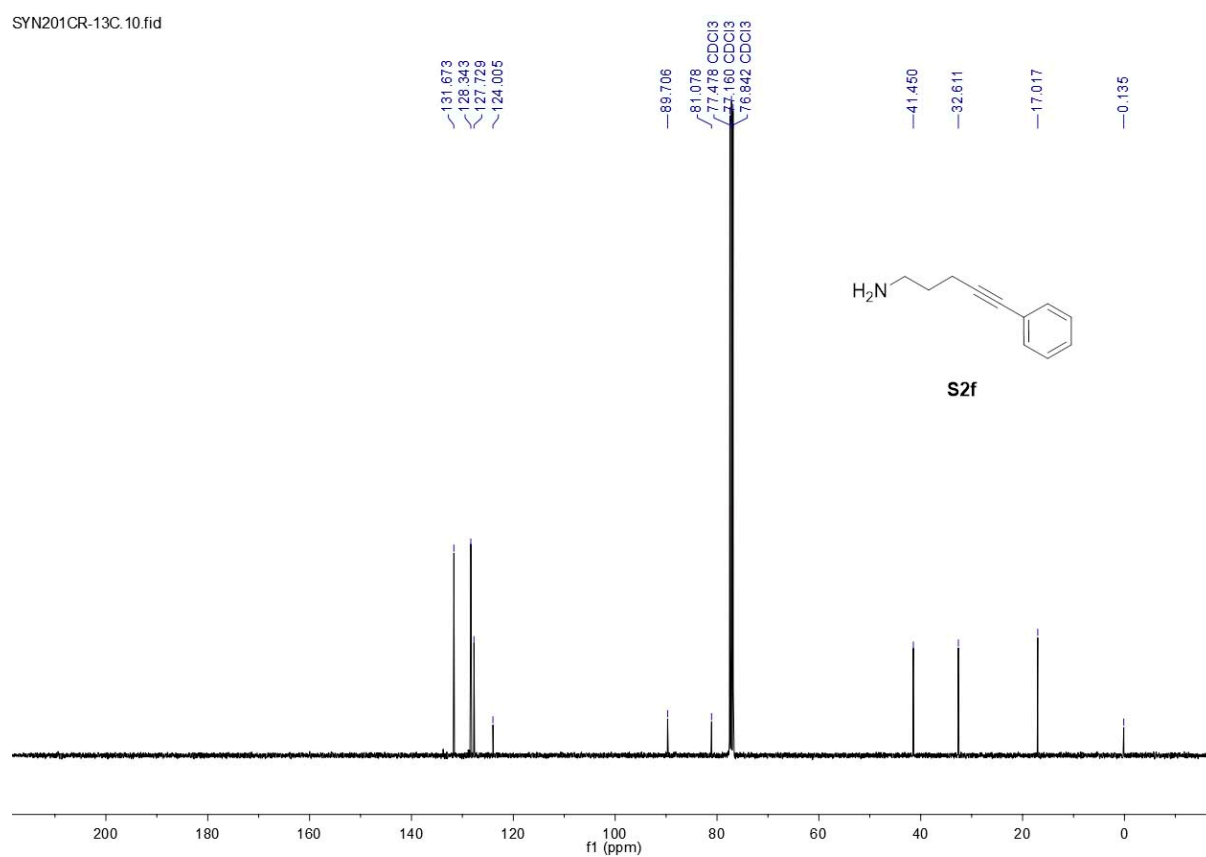

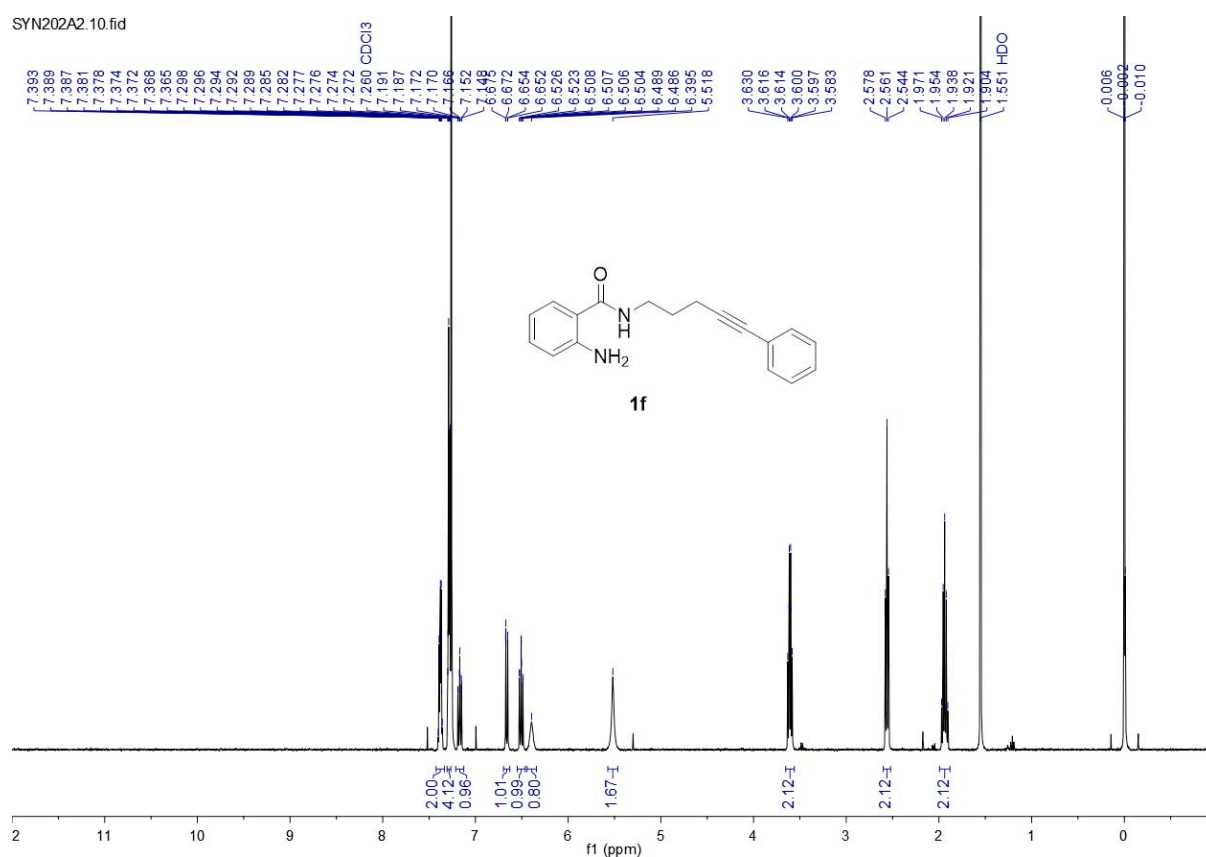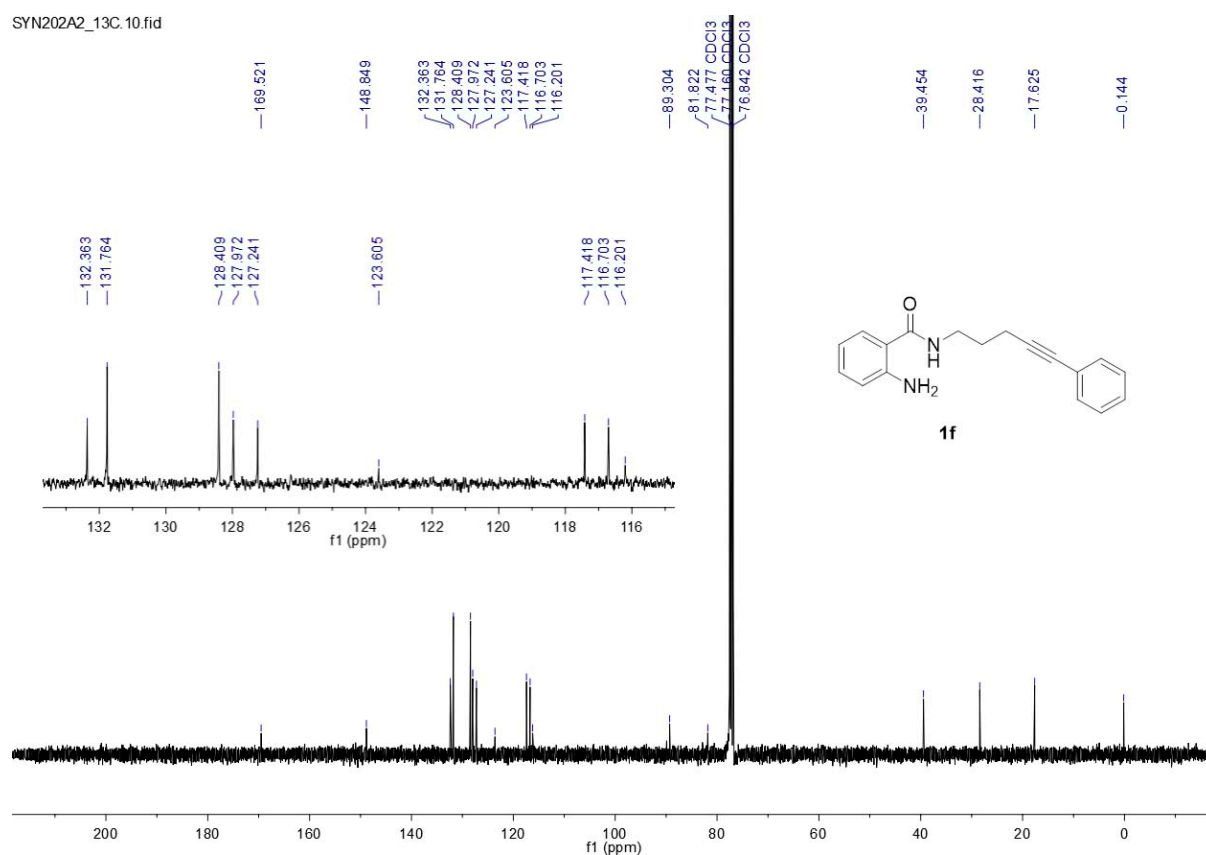

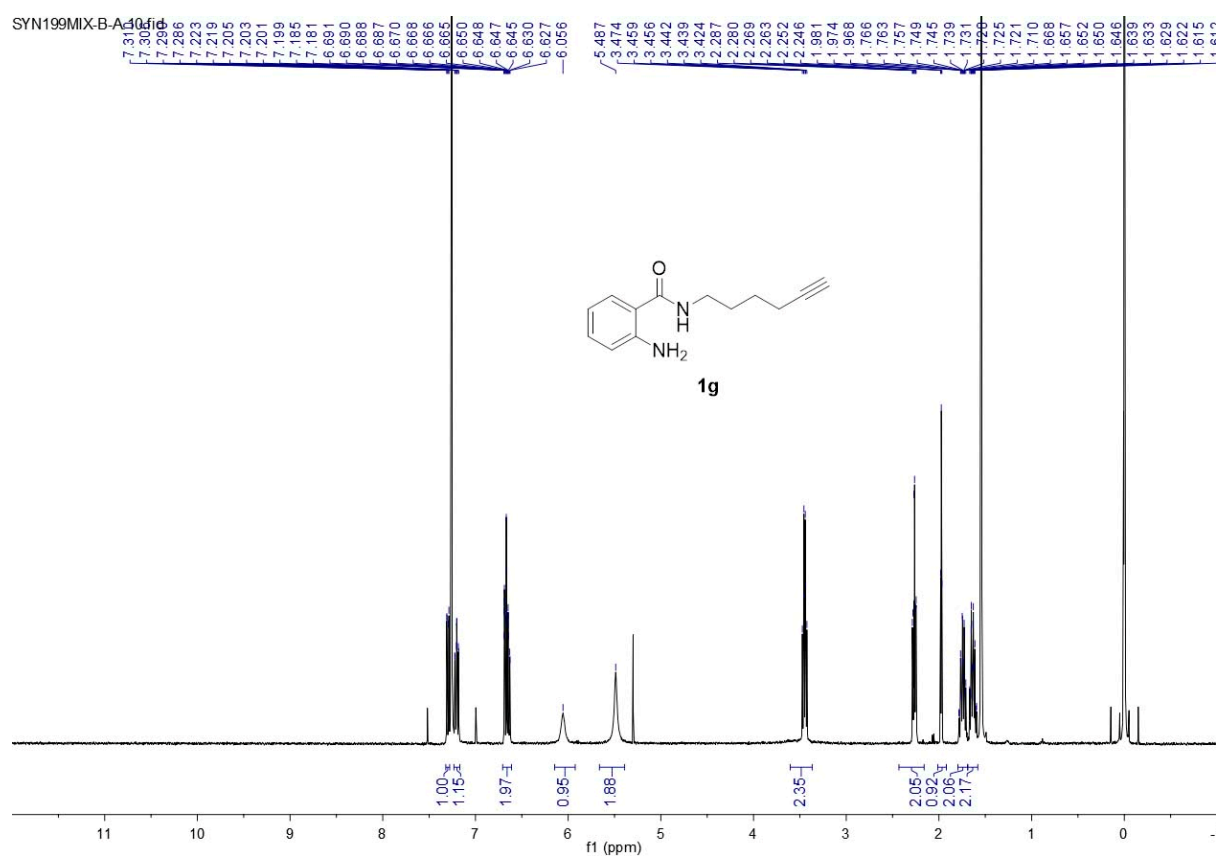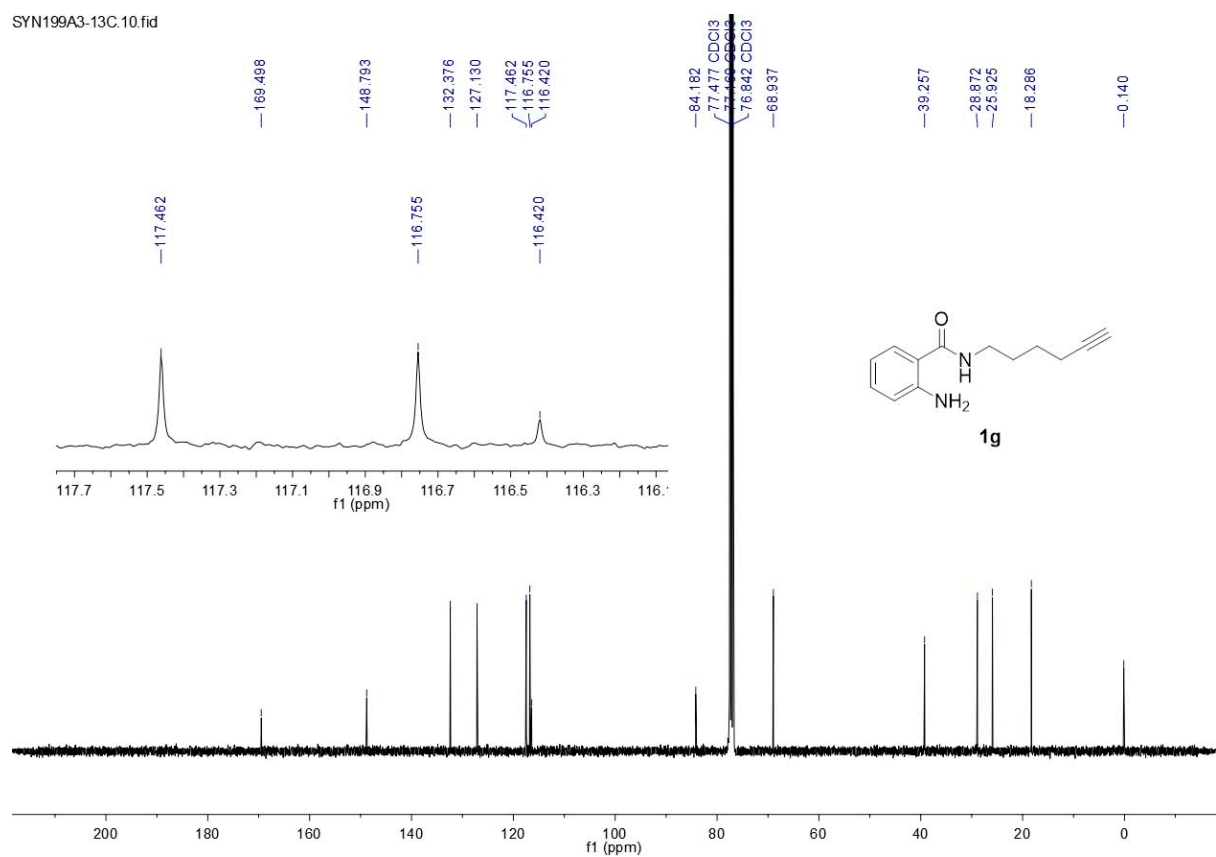

SJY452D.30.fid

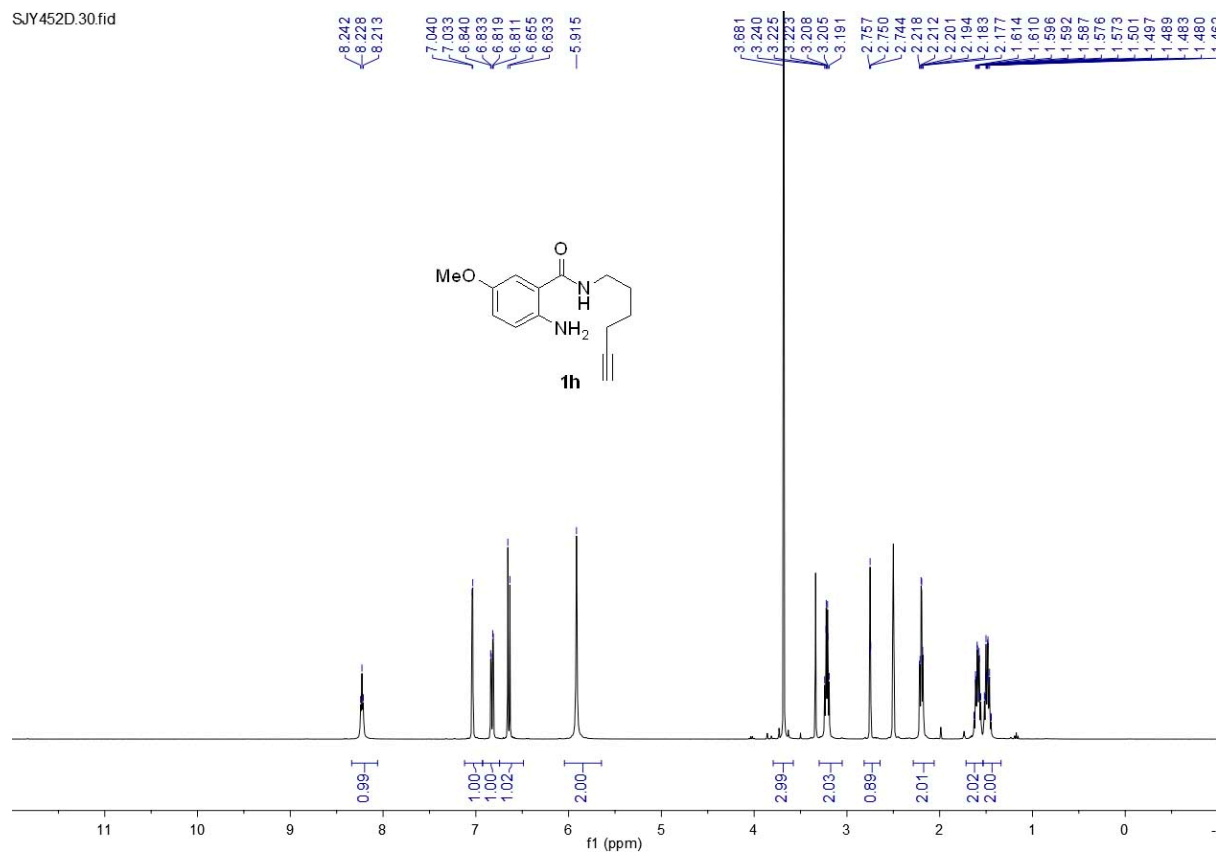

C-SJY452D.10.fid

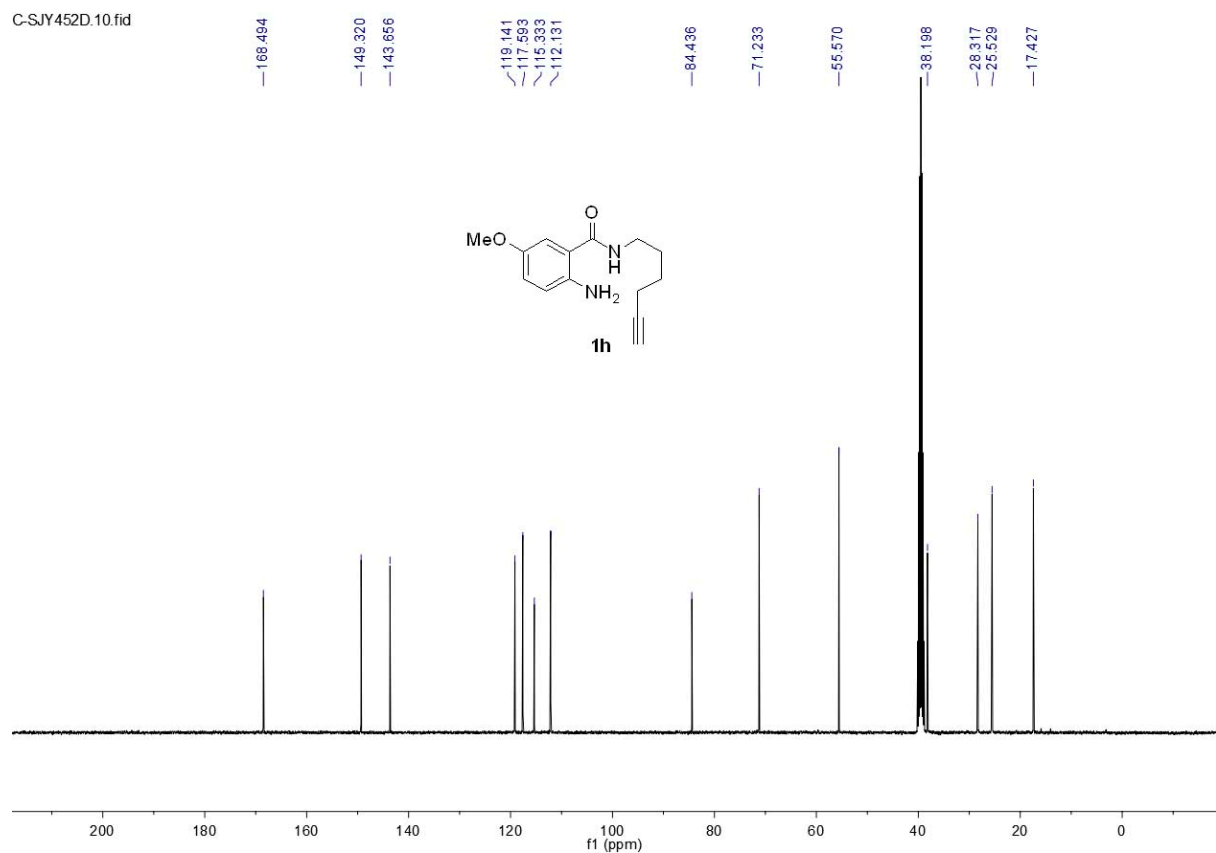

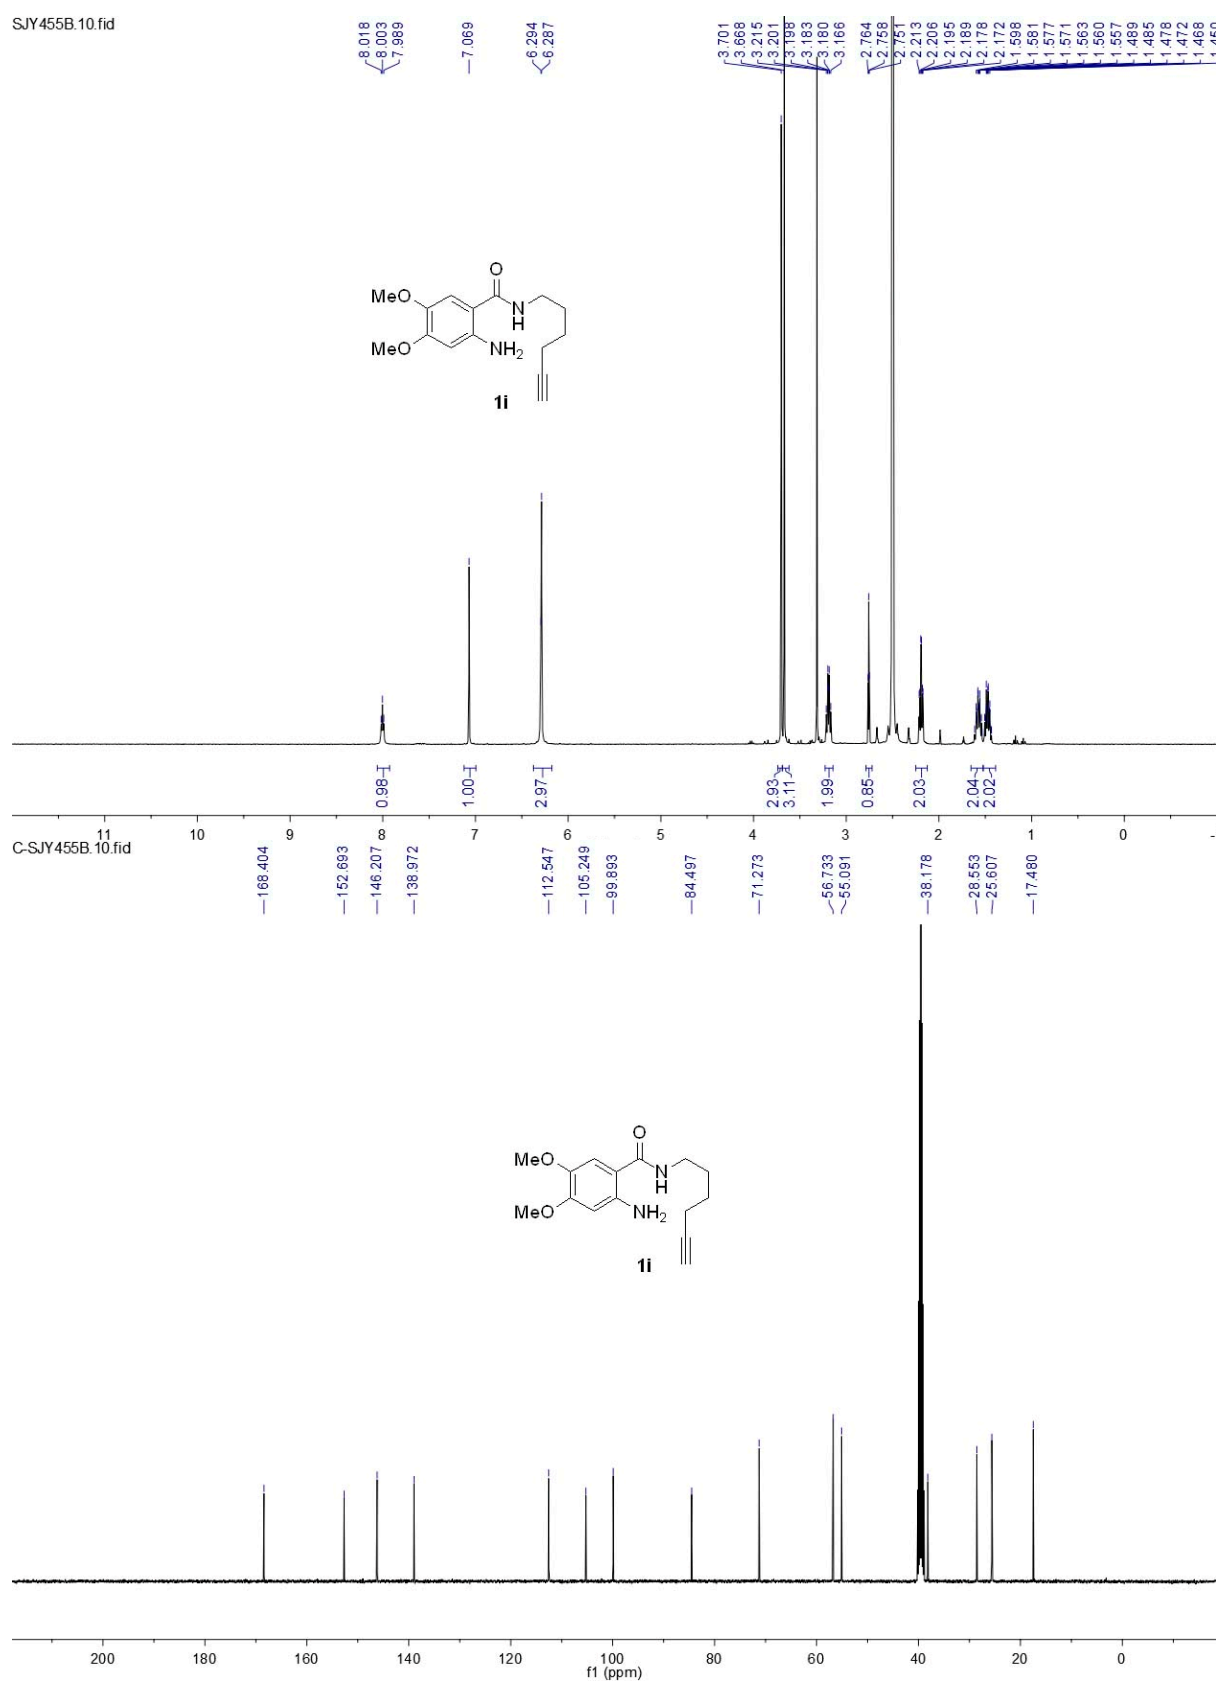

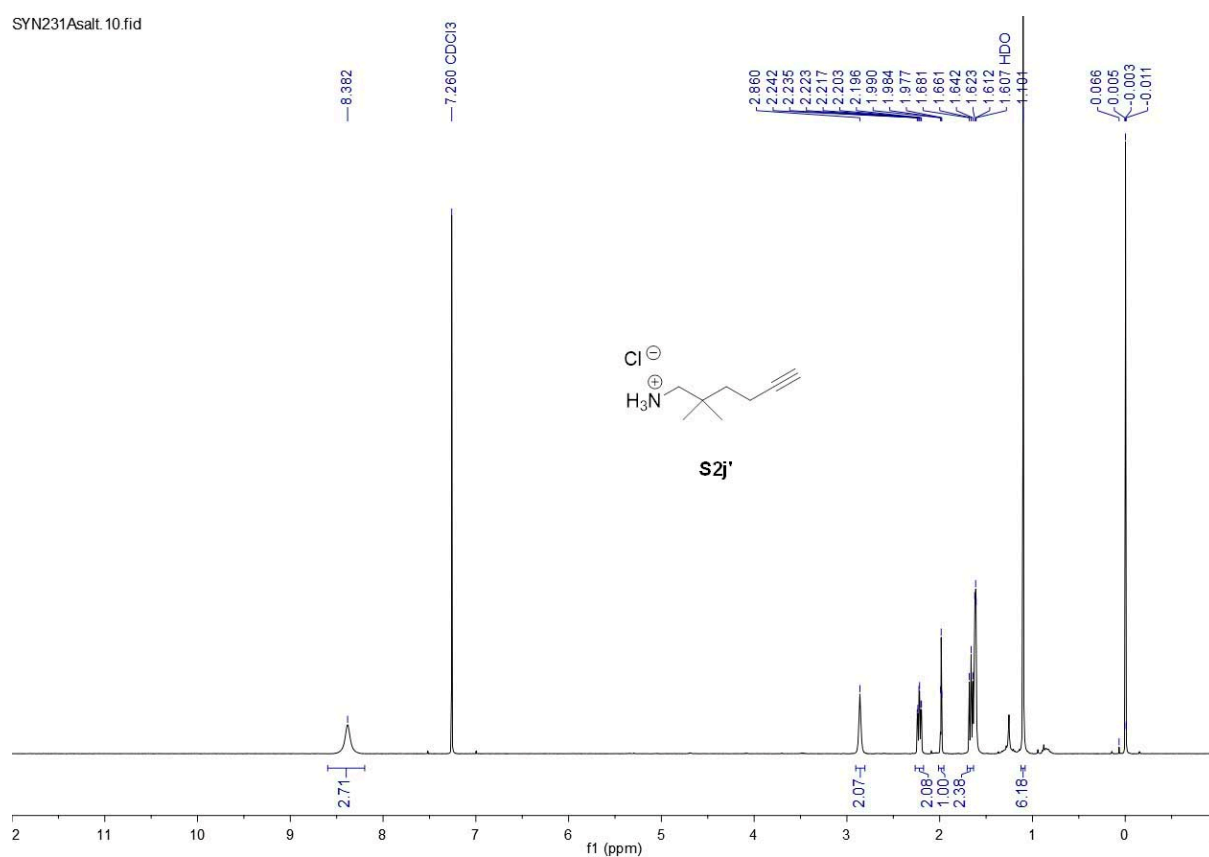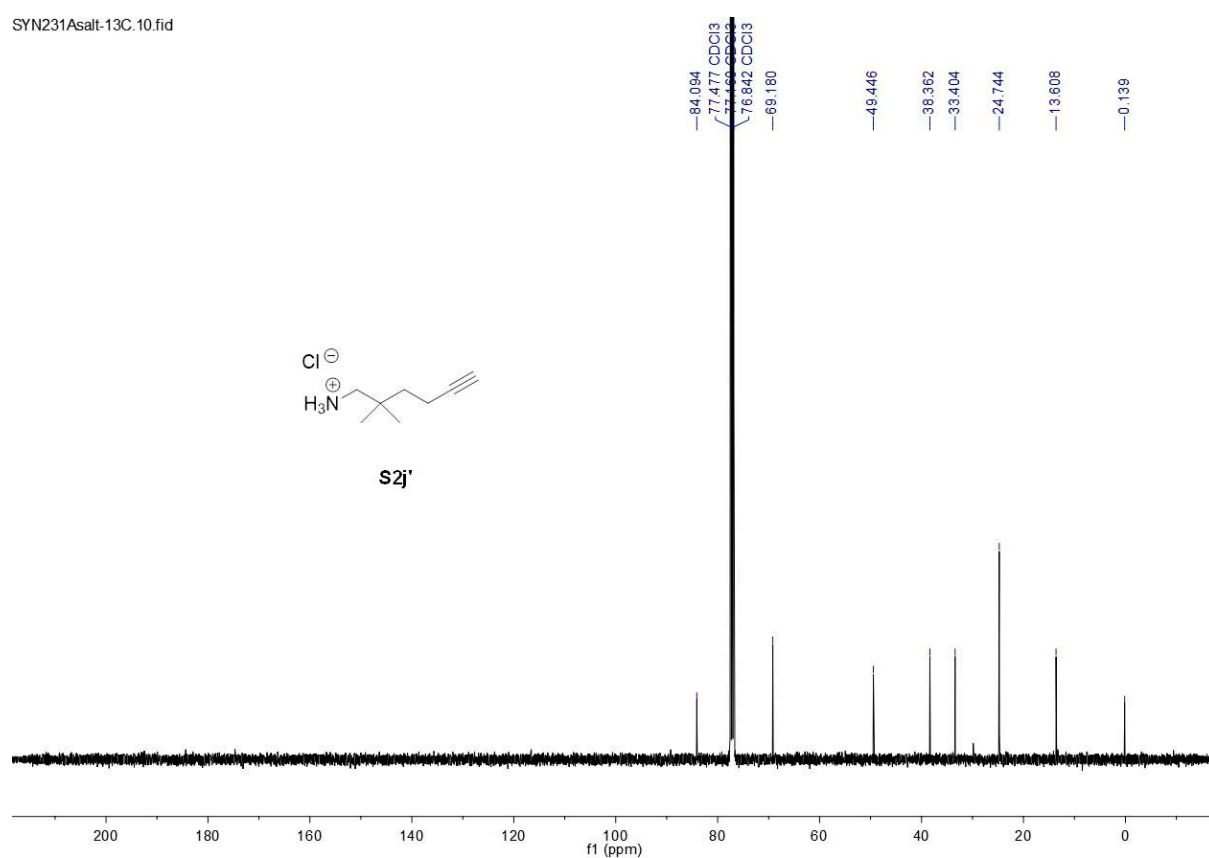

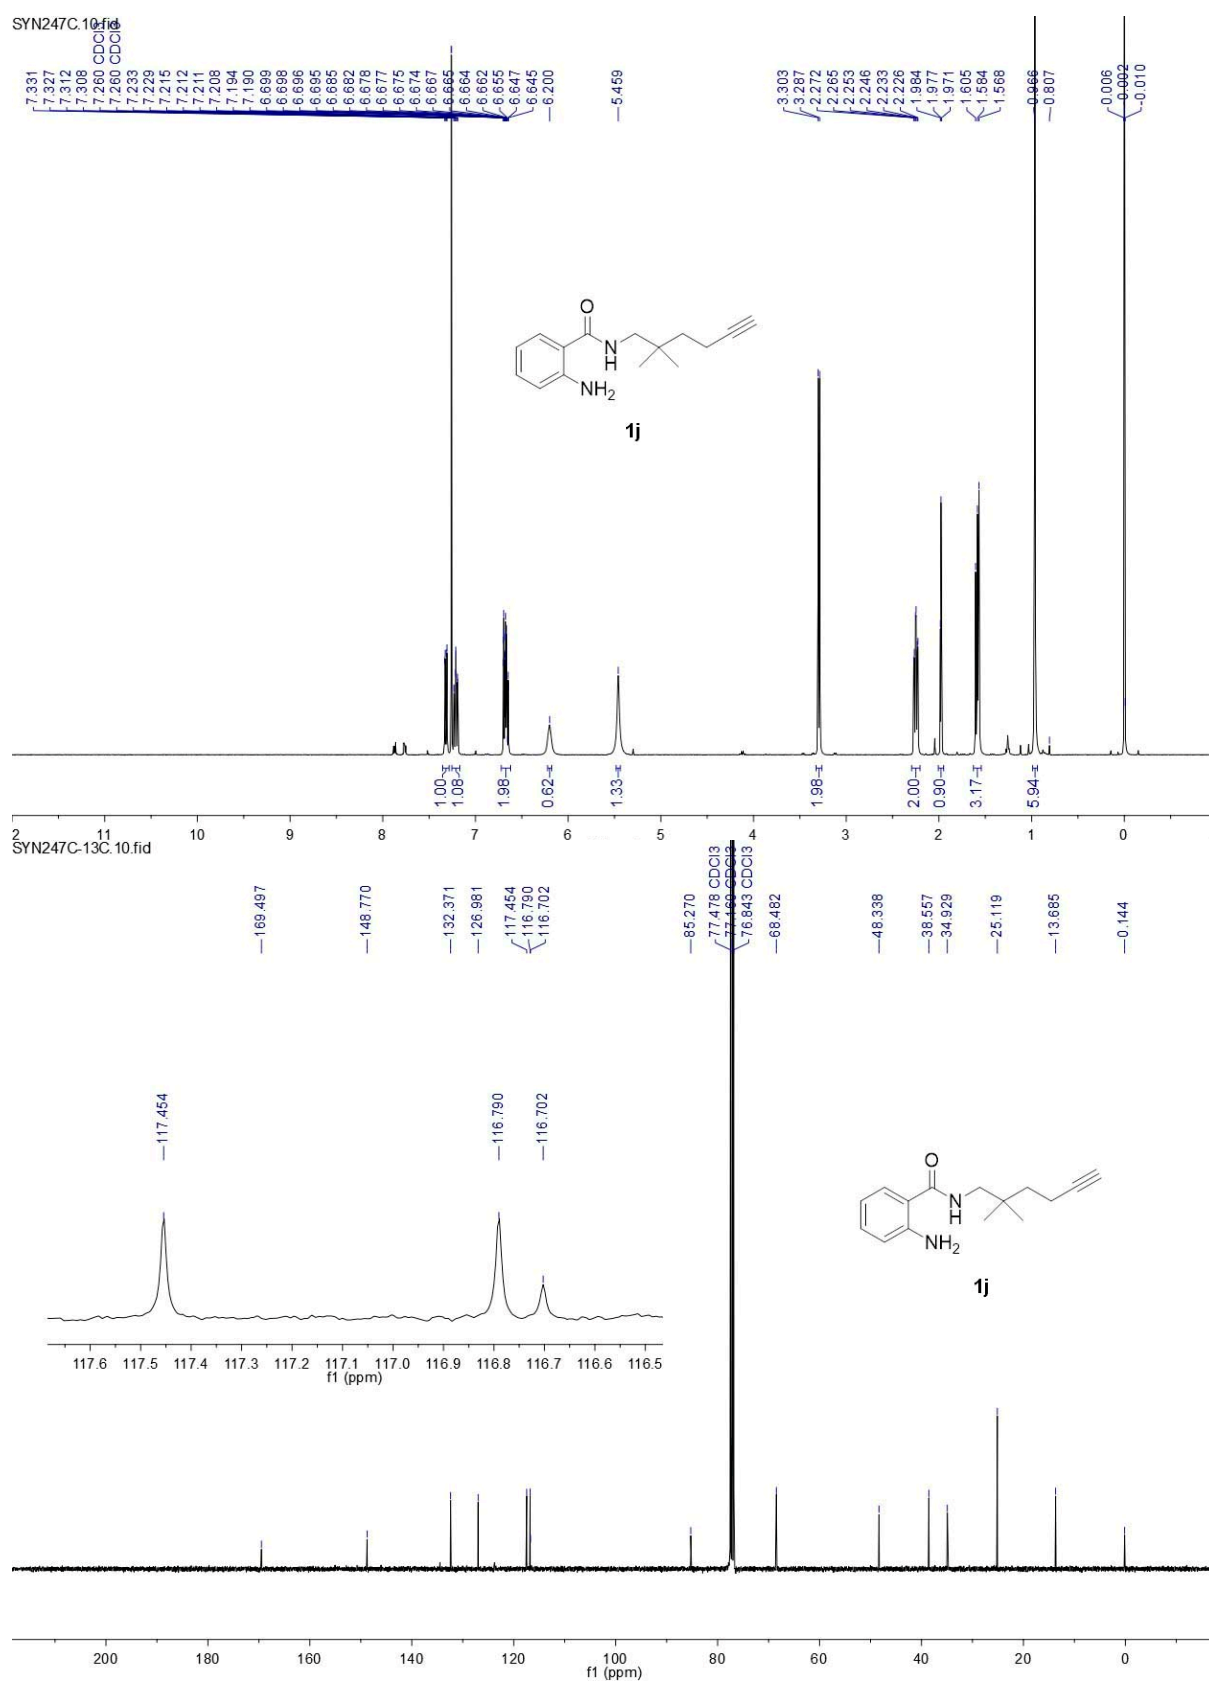

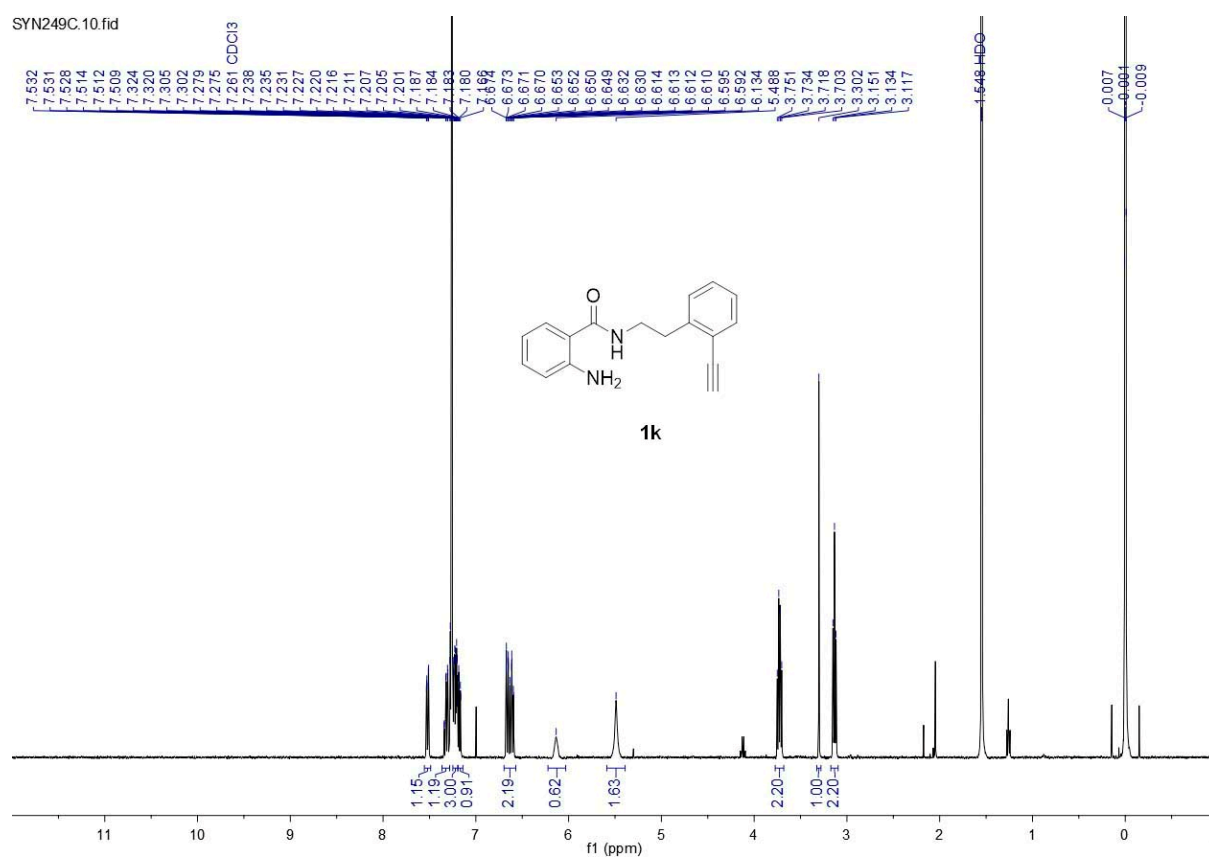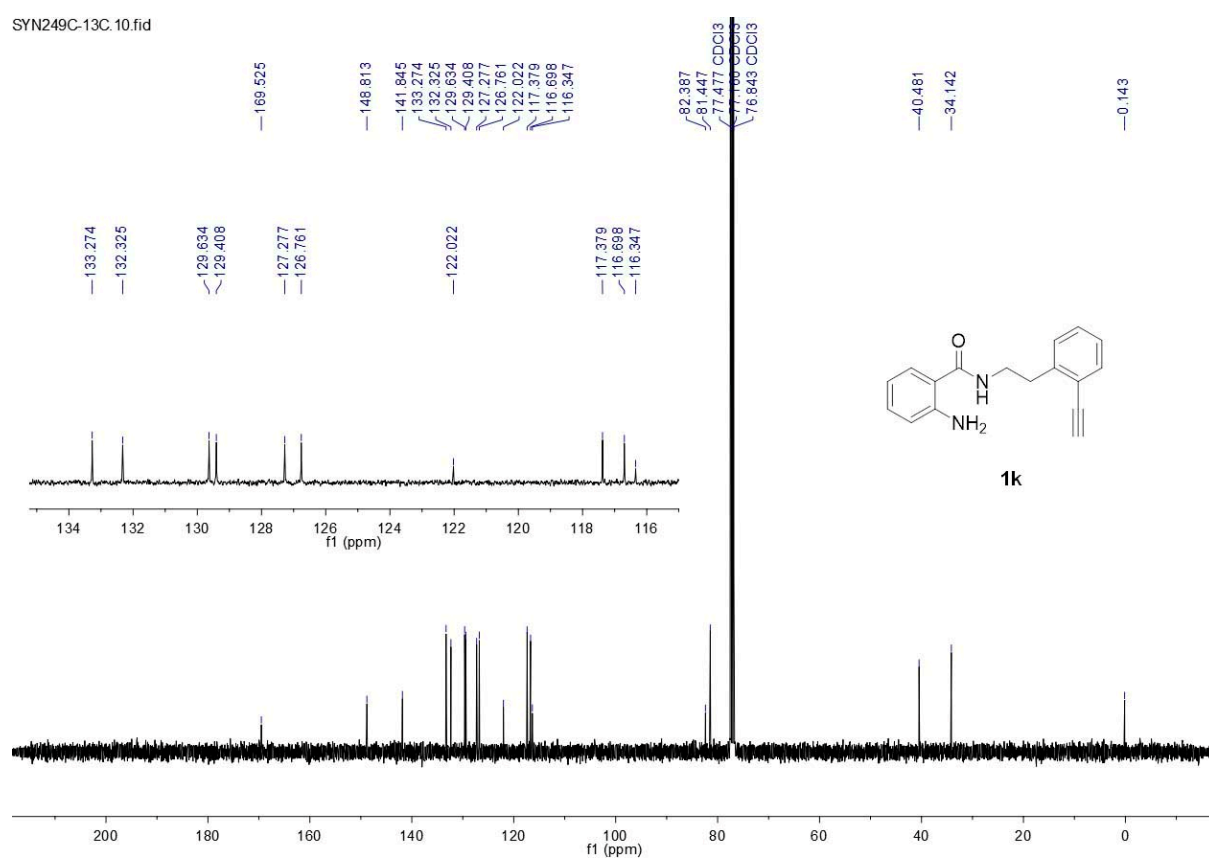



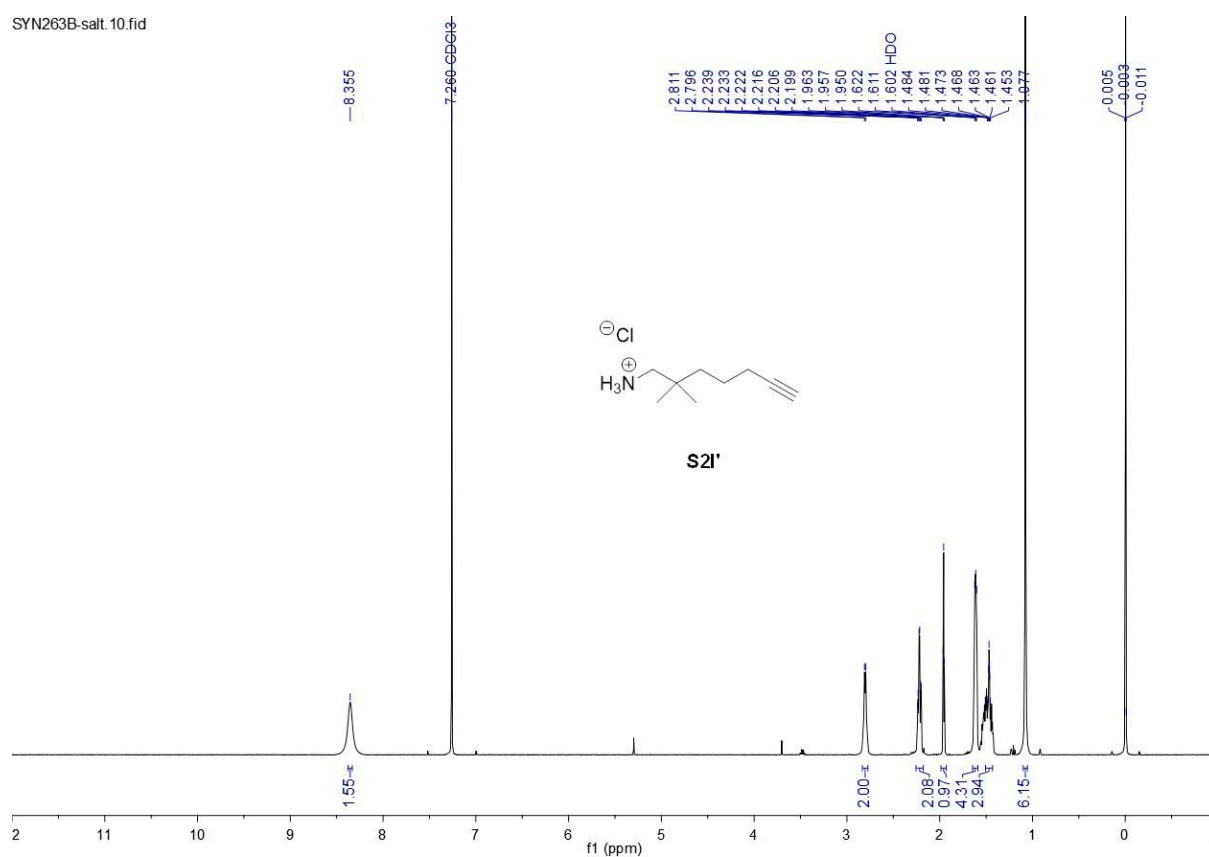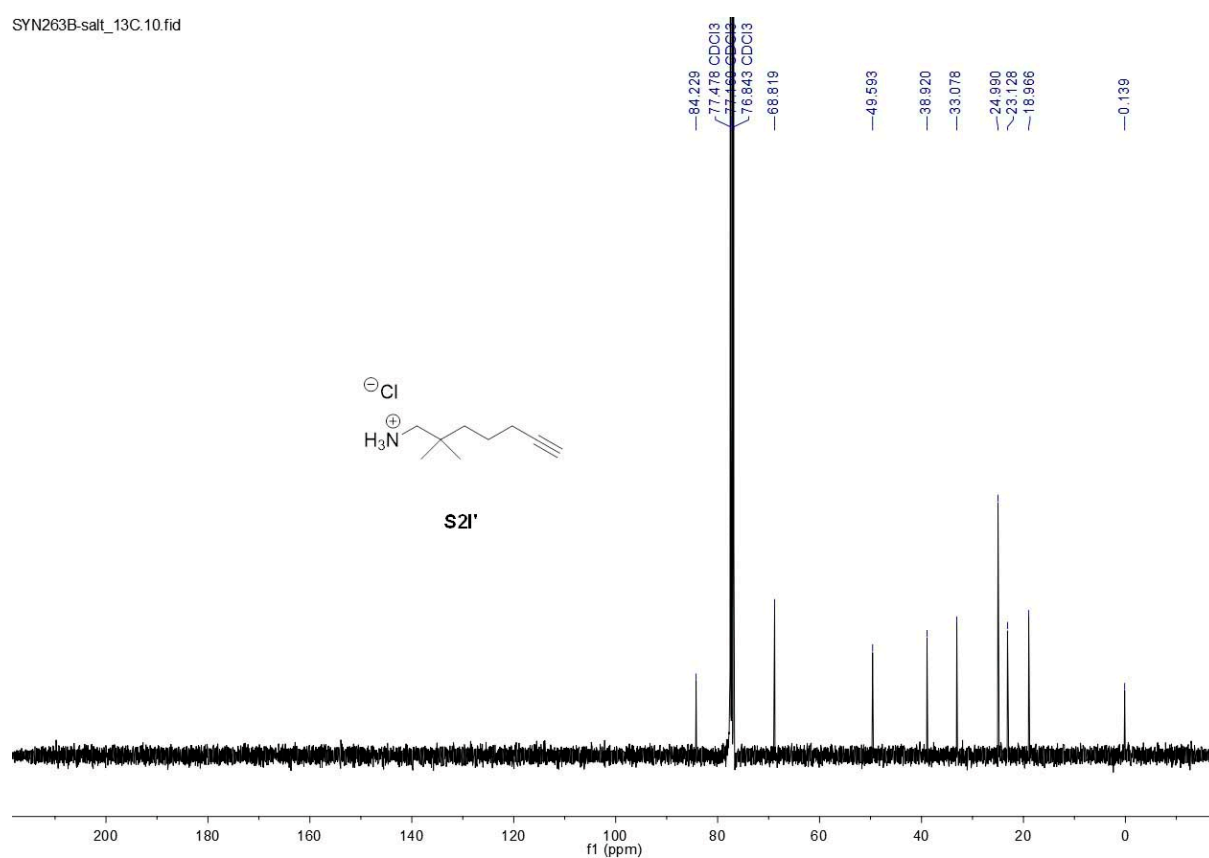

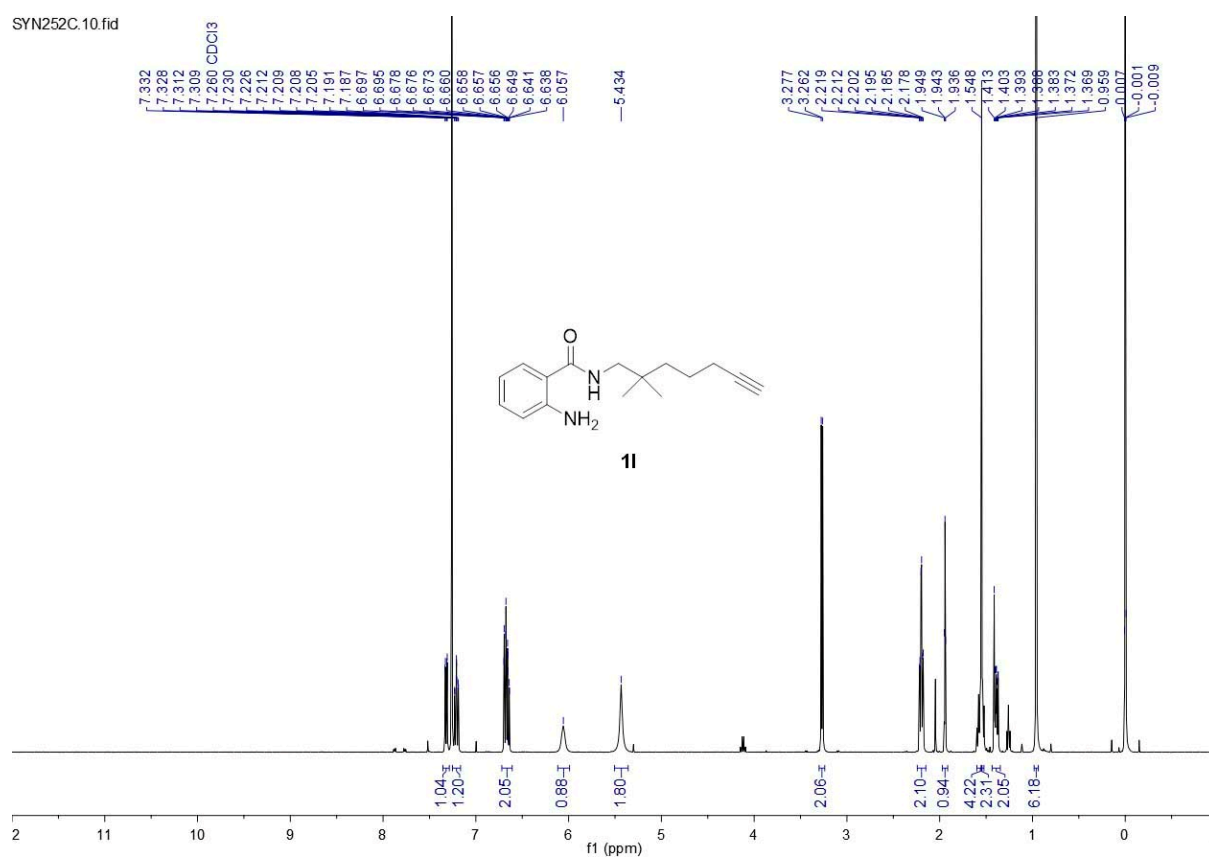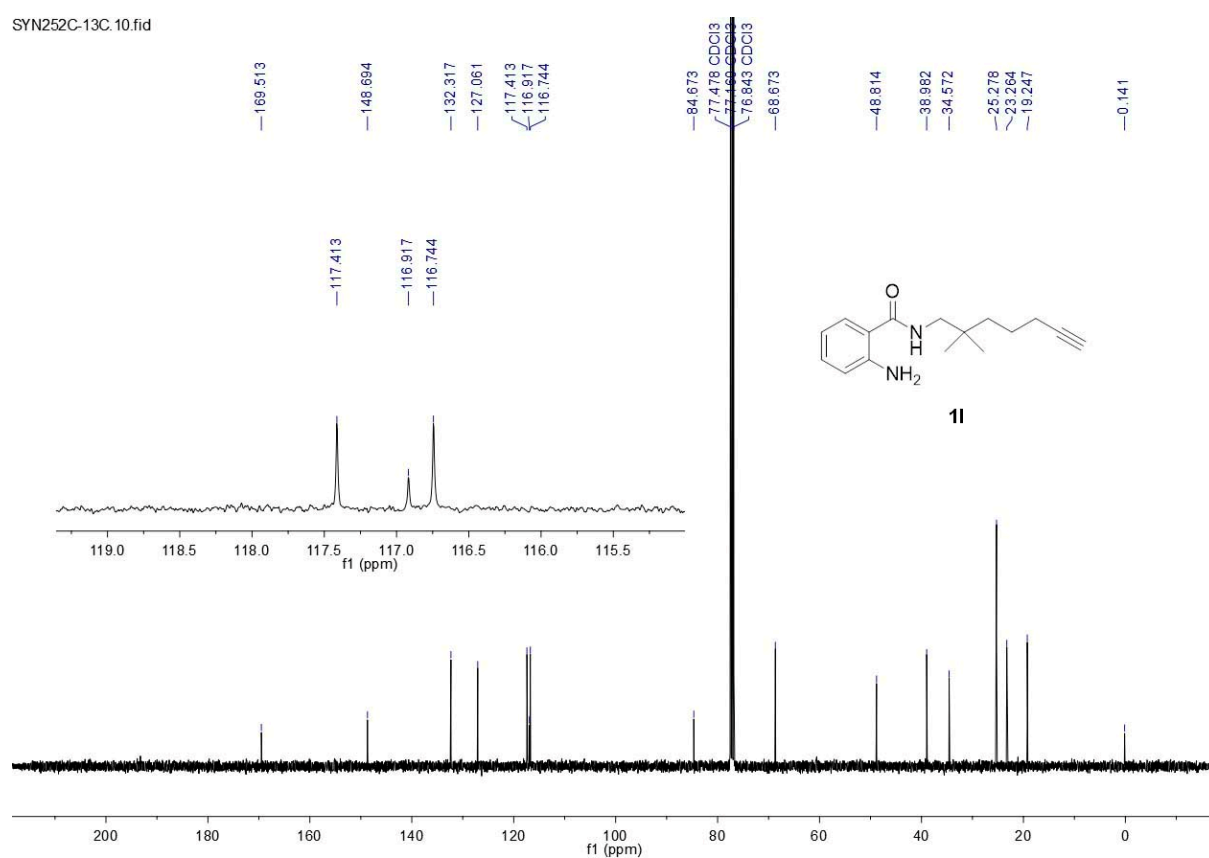

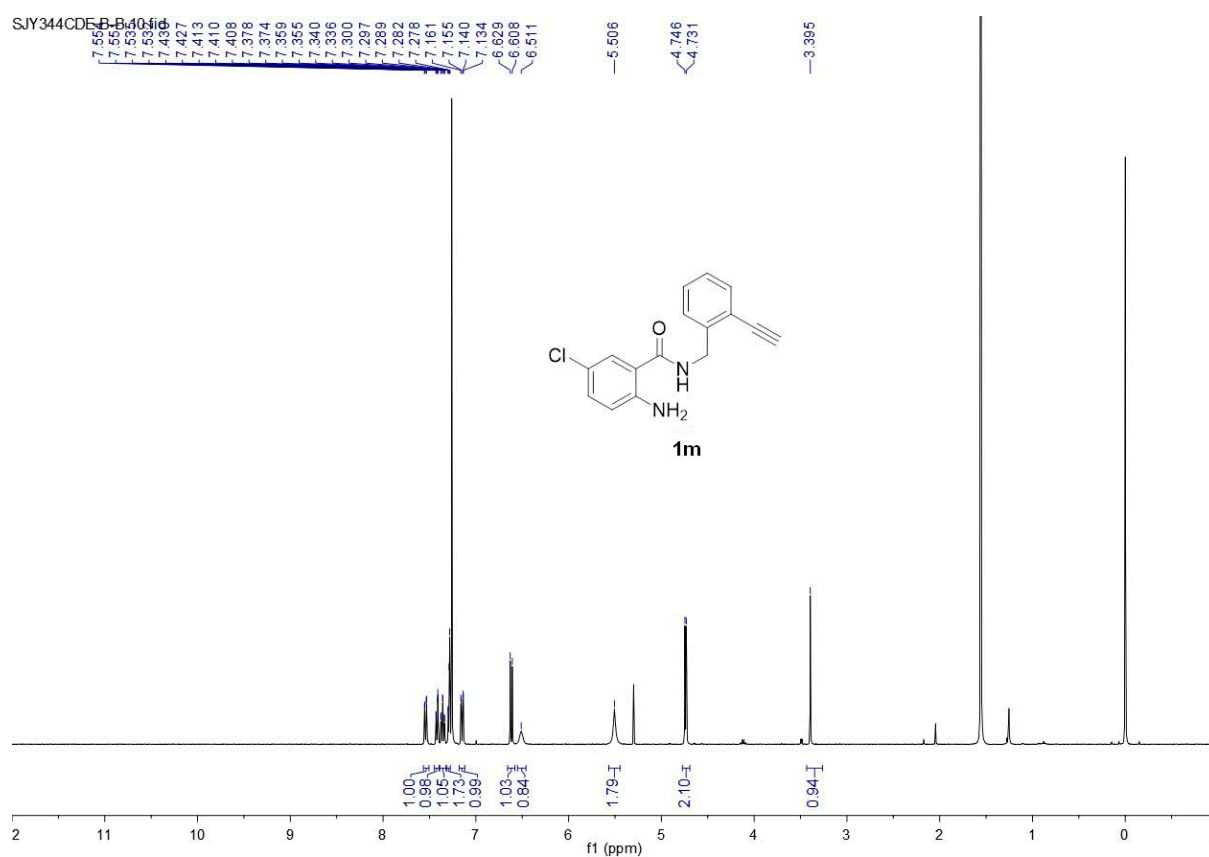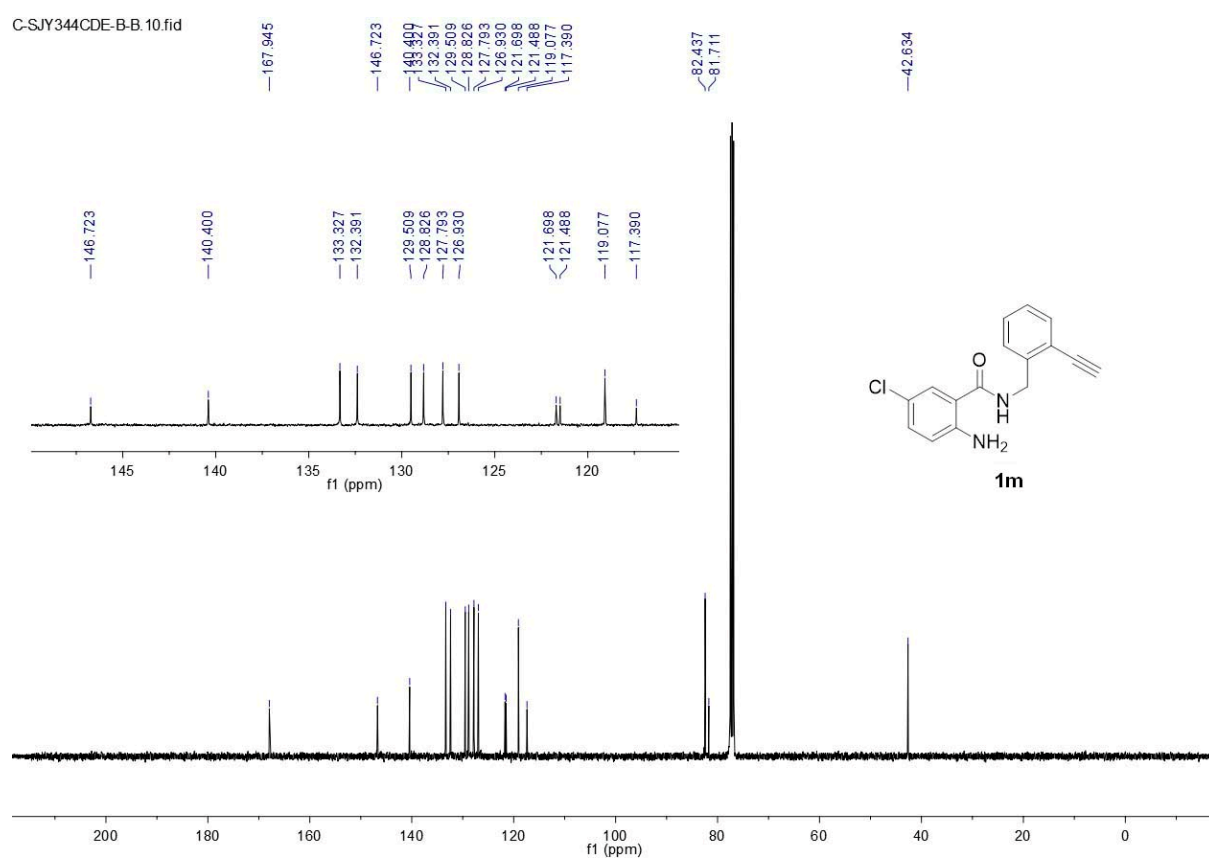

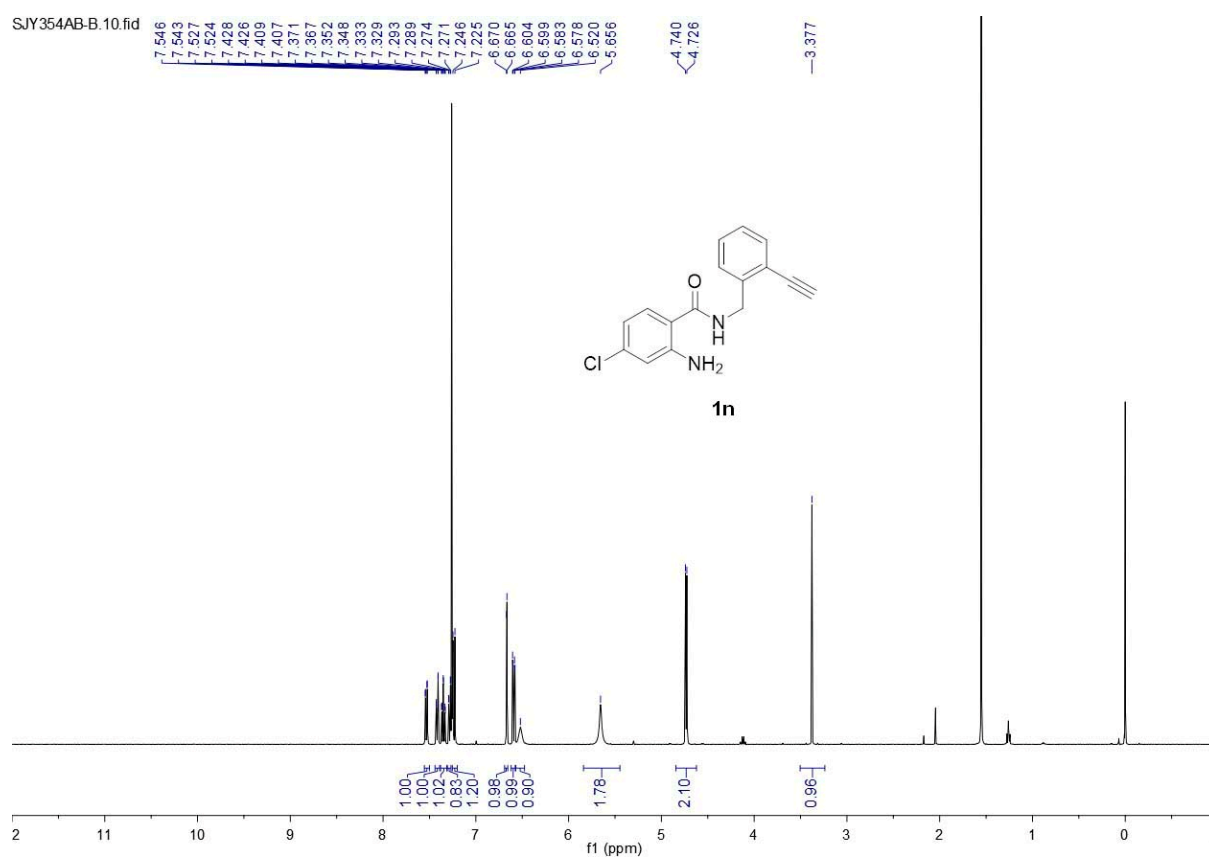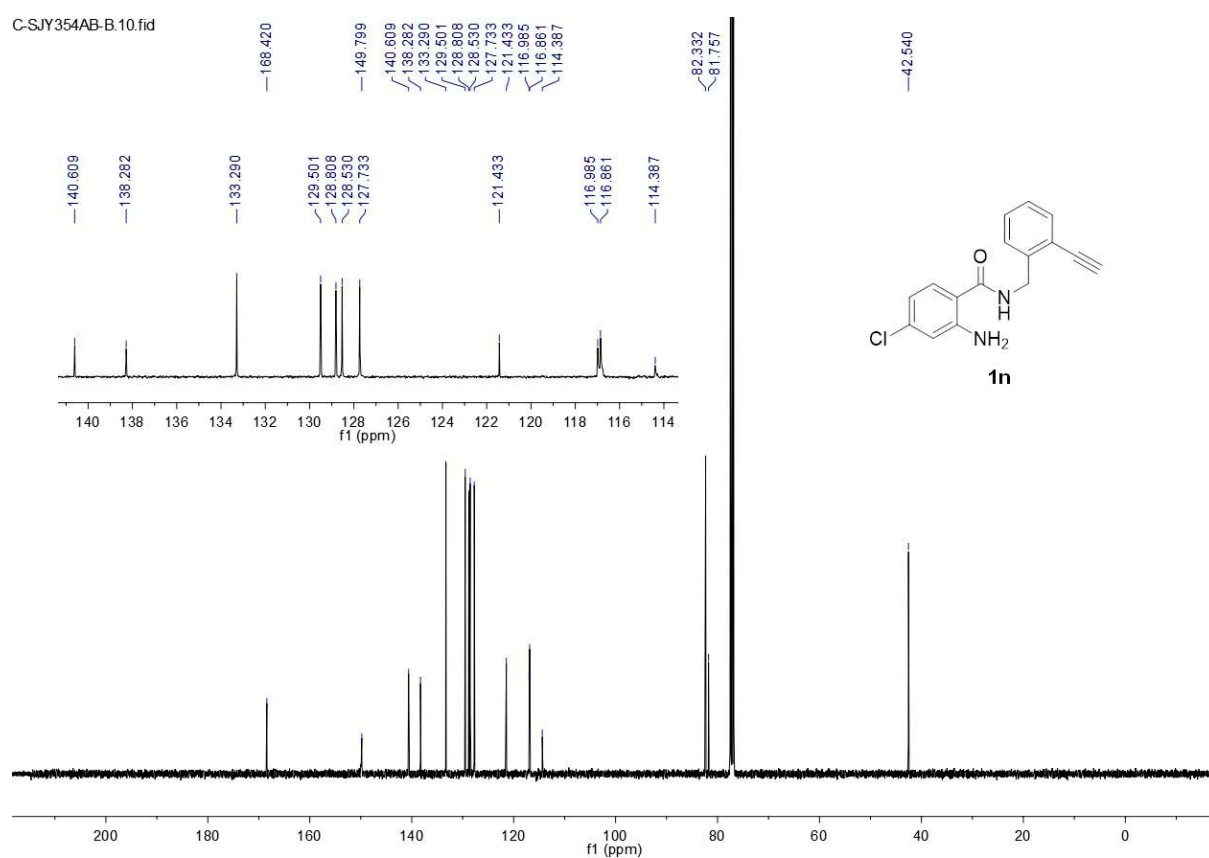

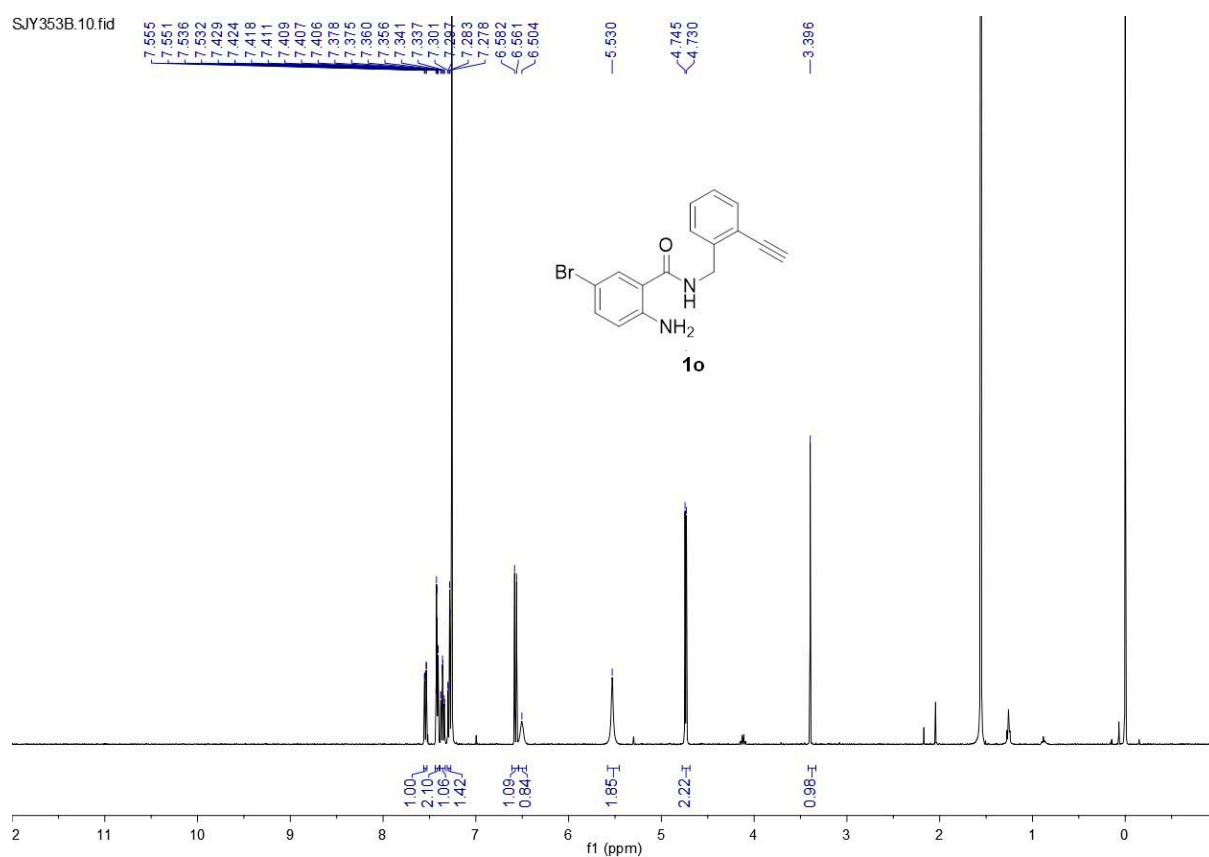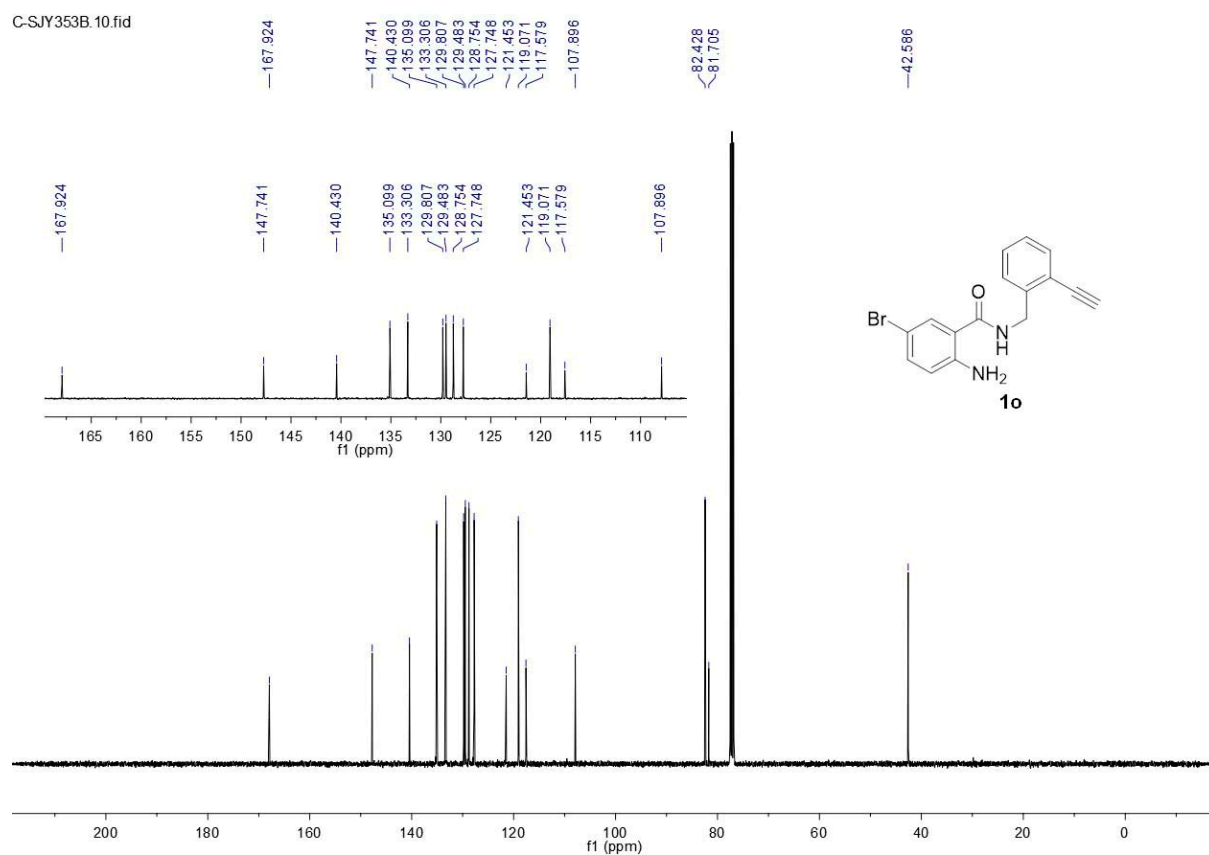

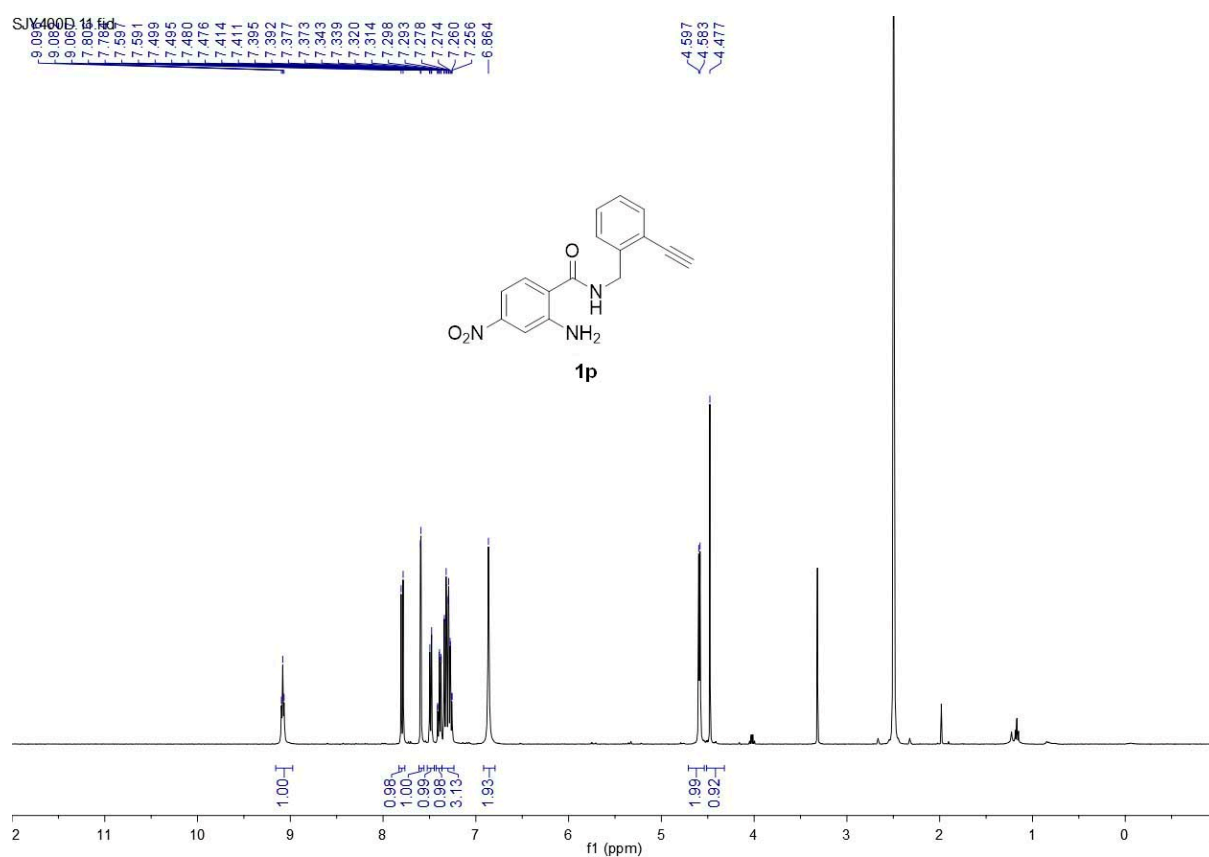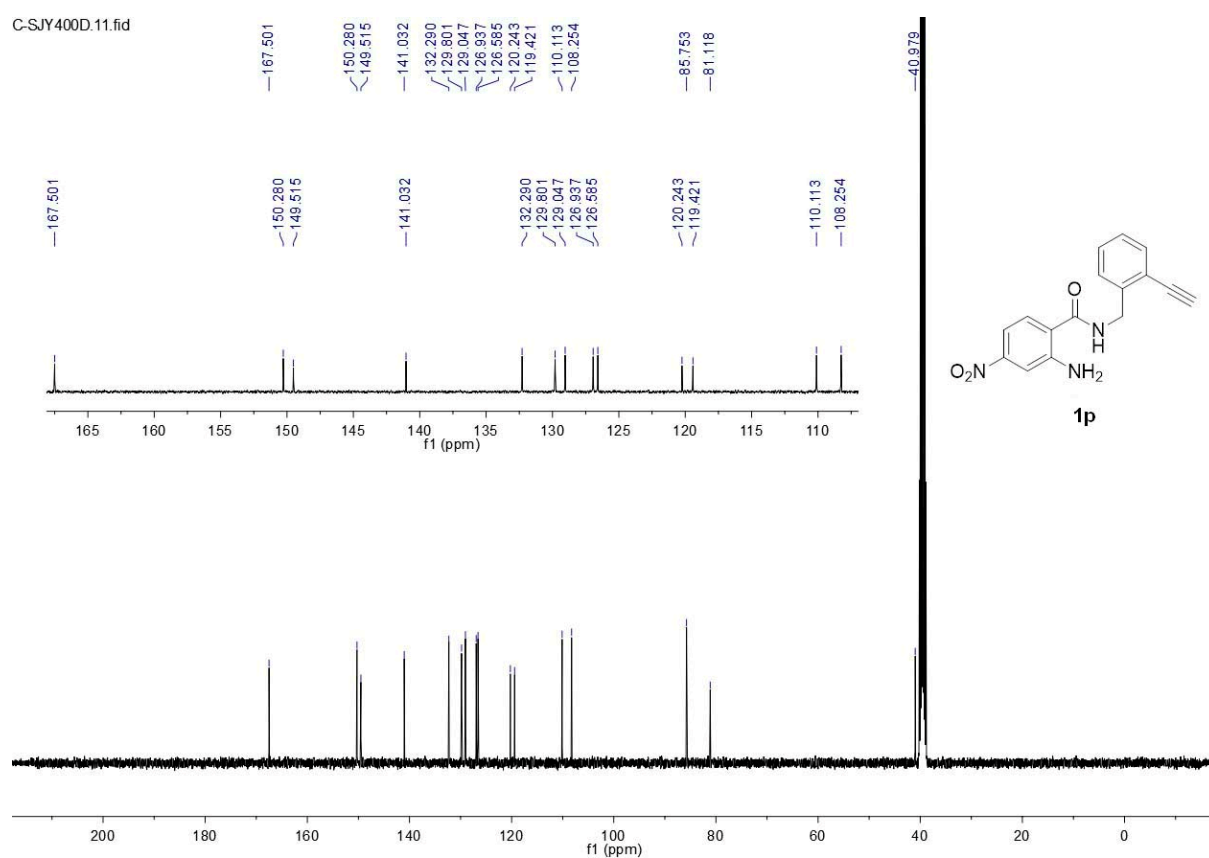

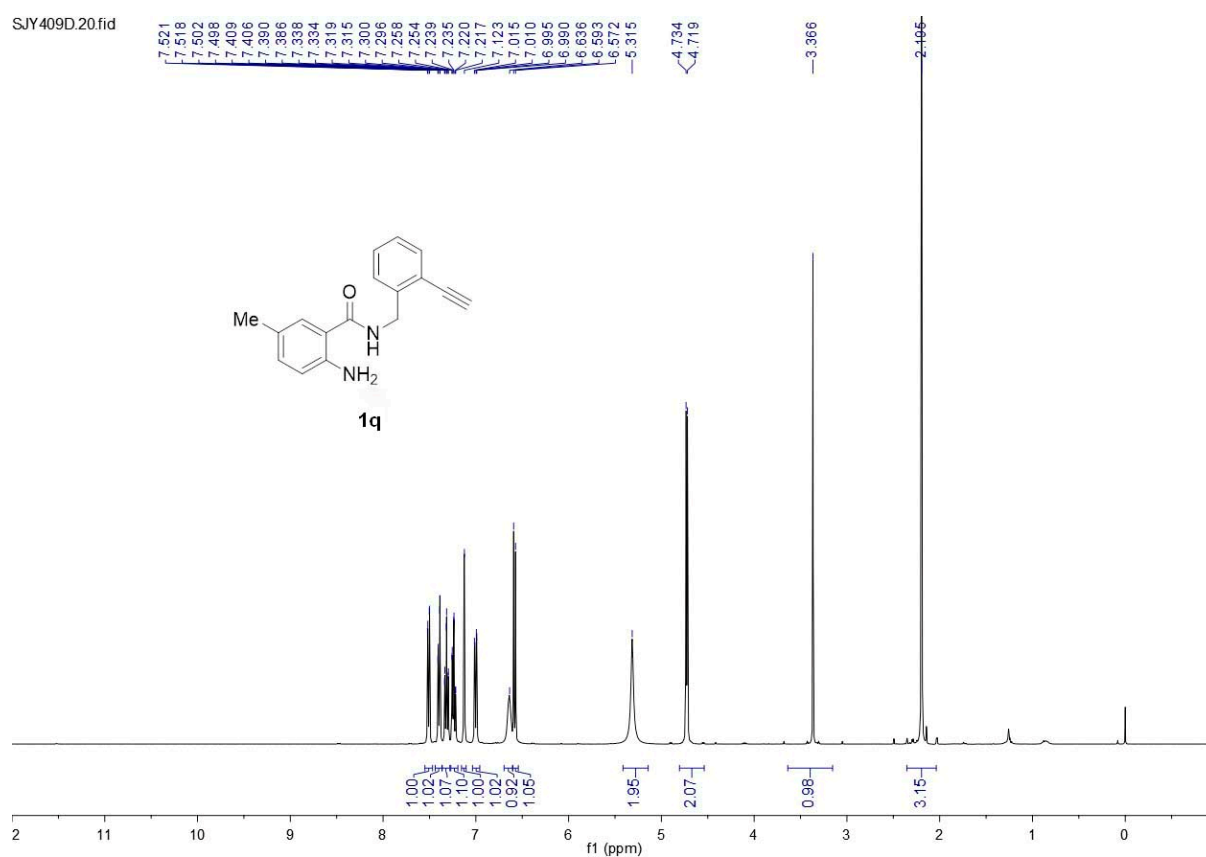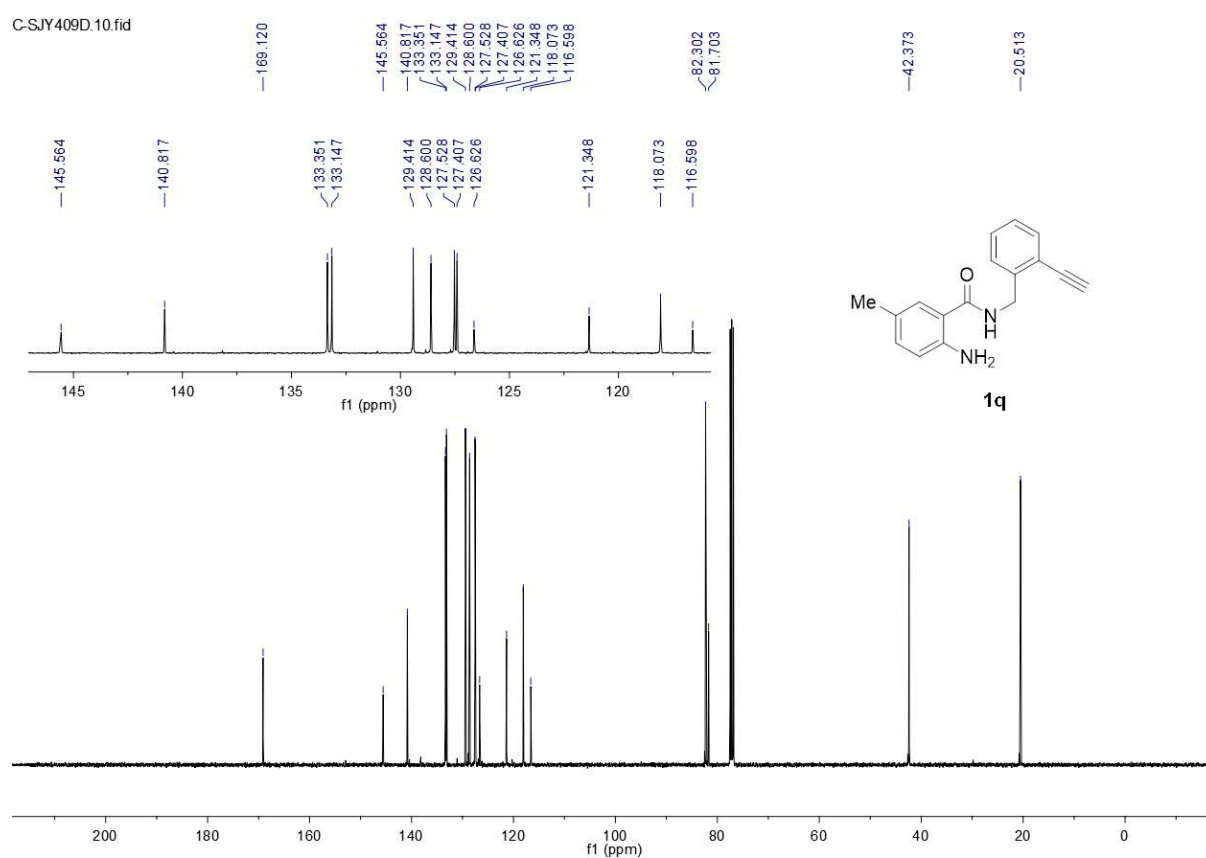

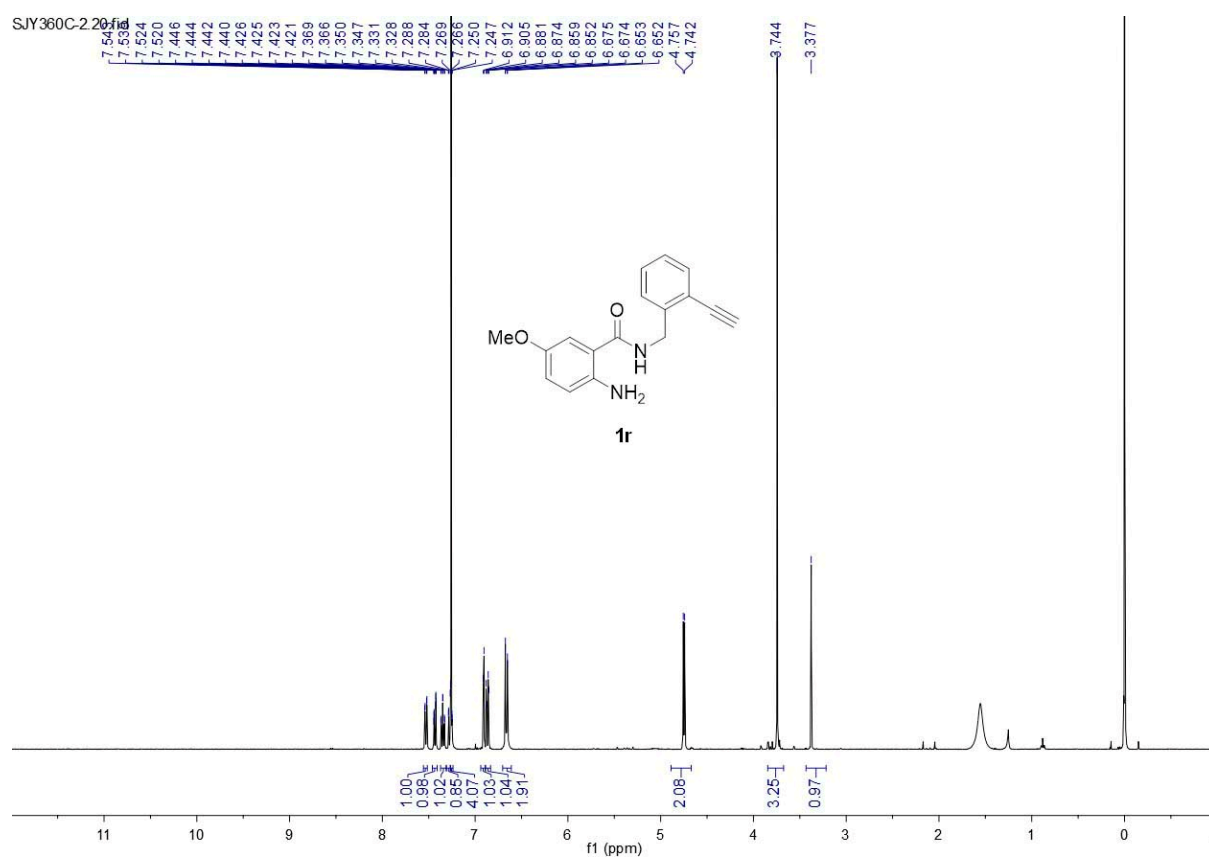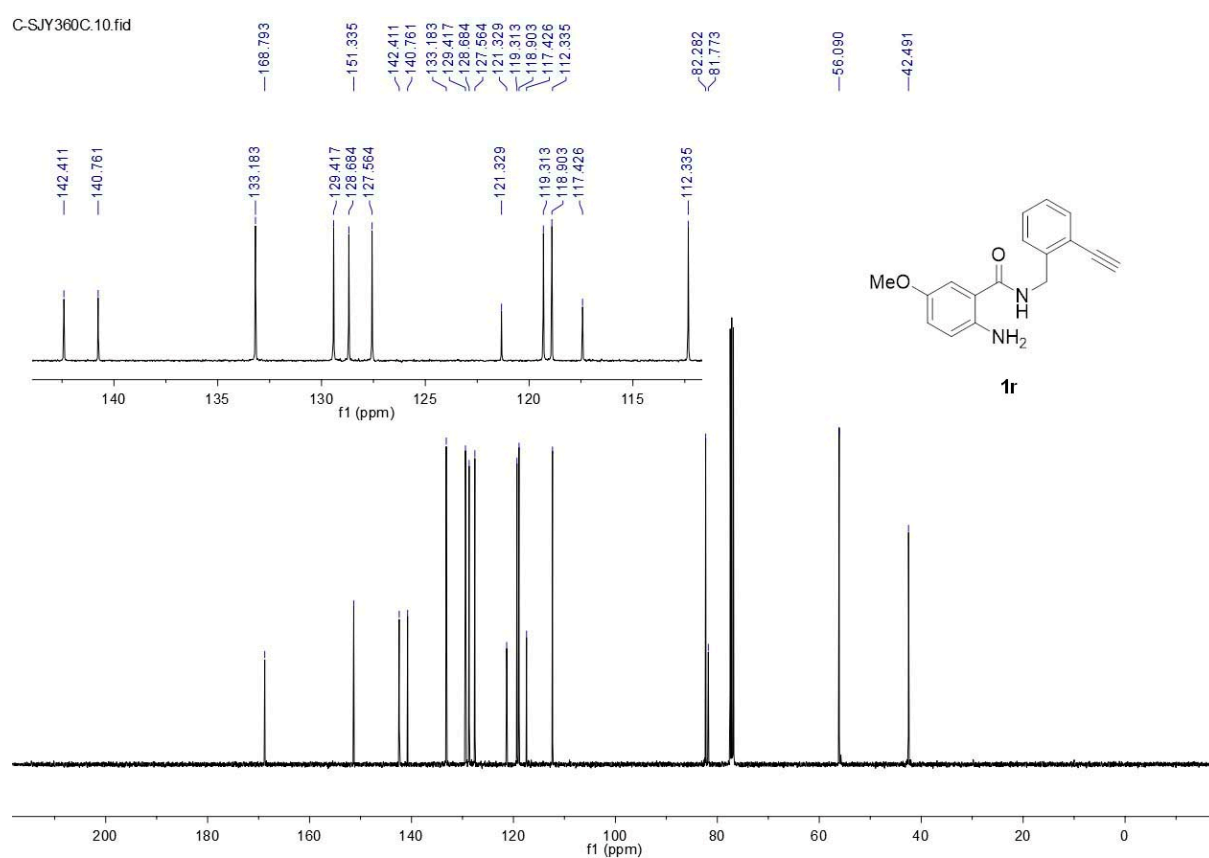



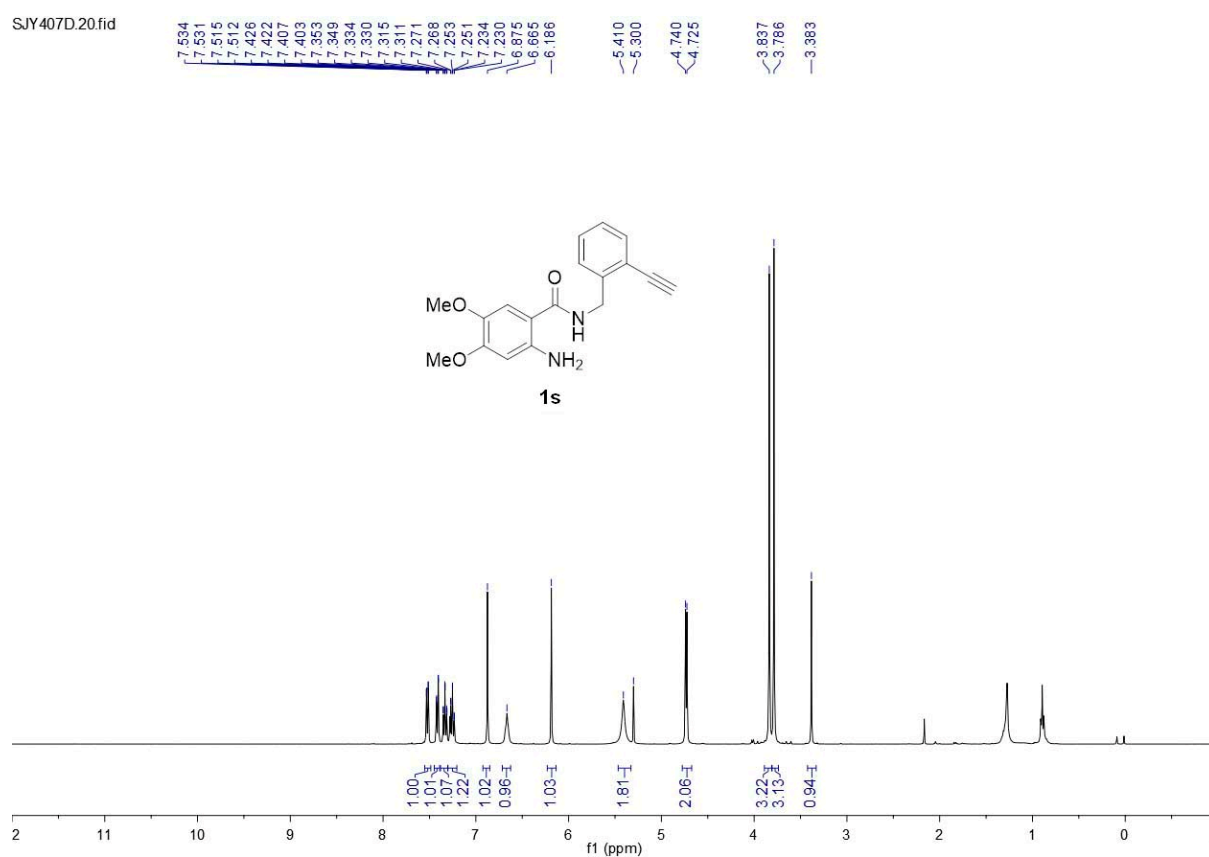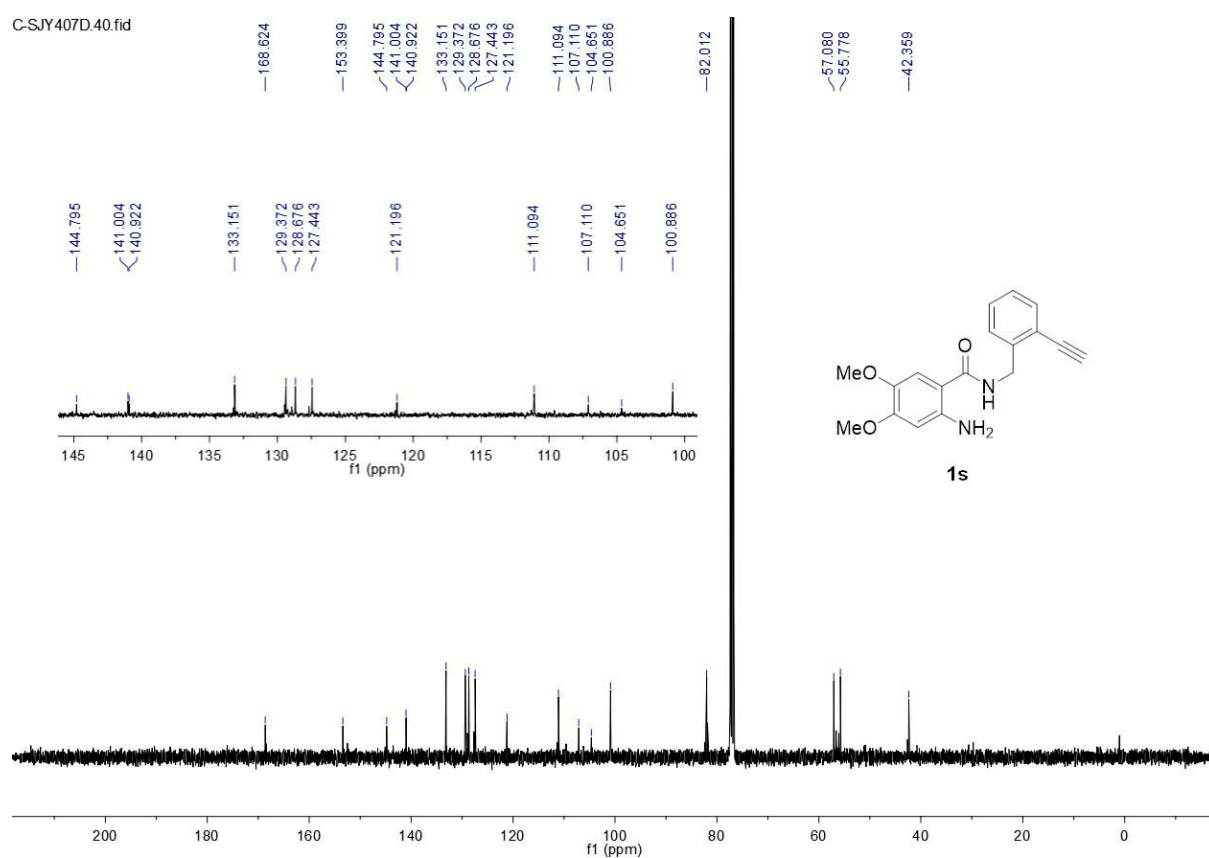

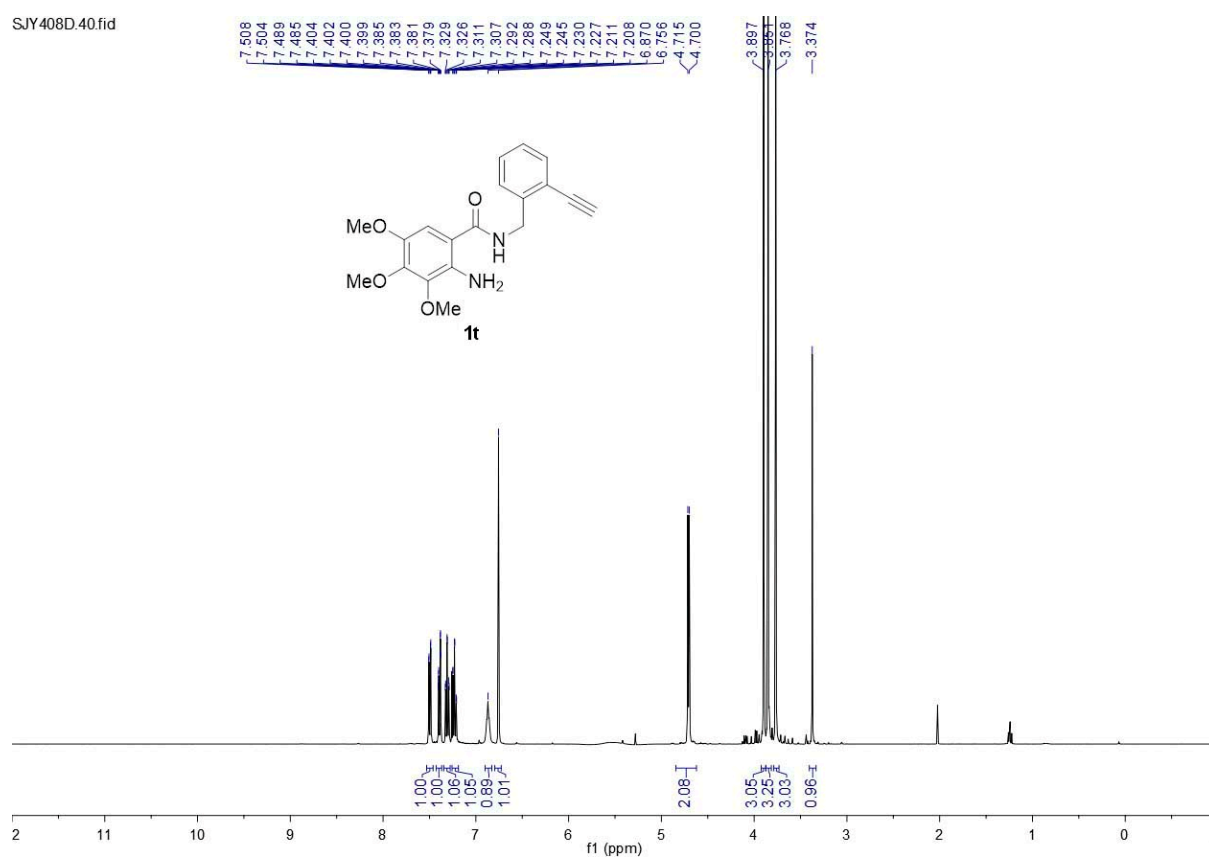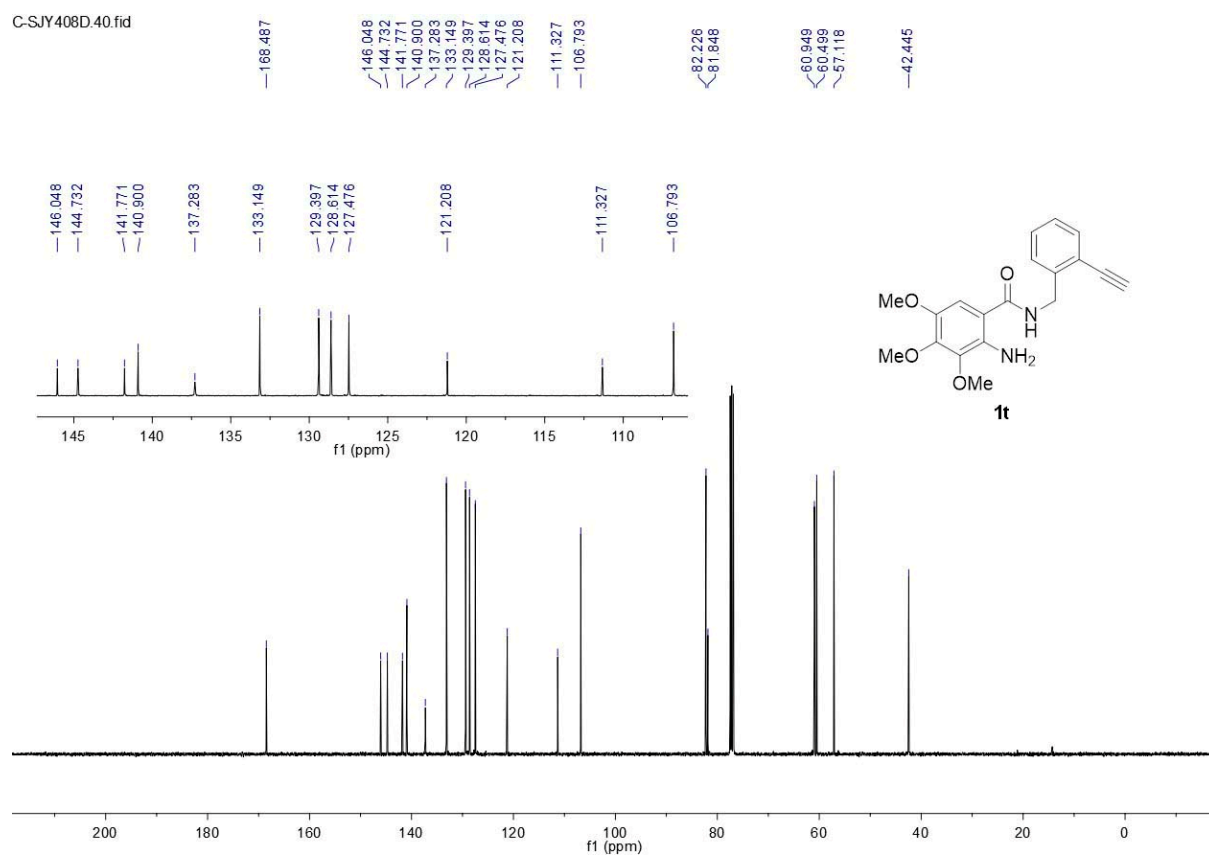

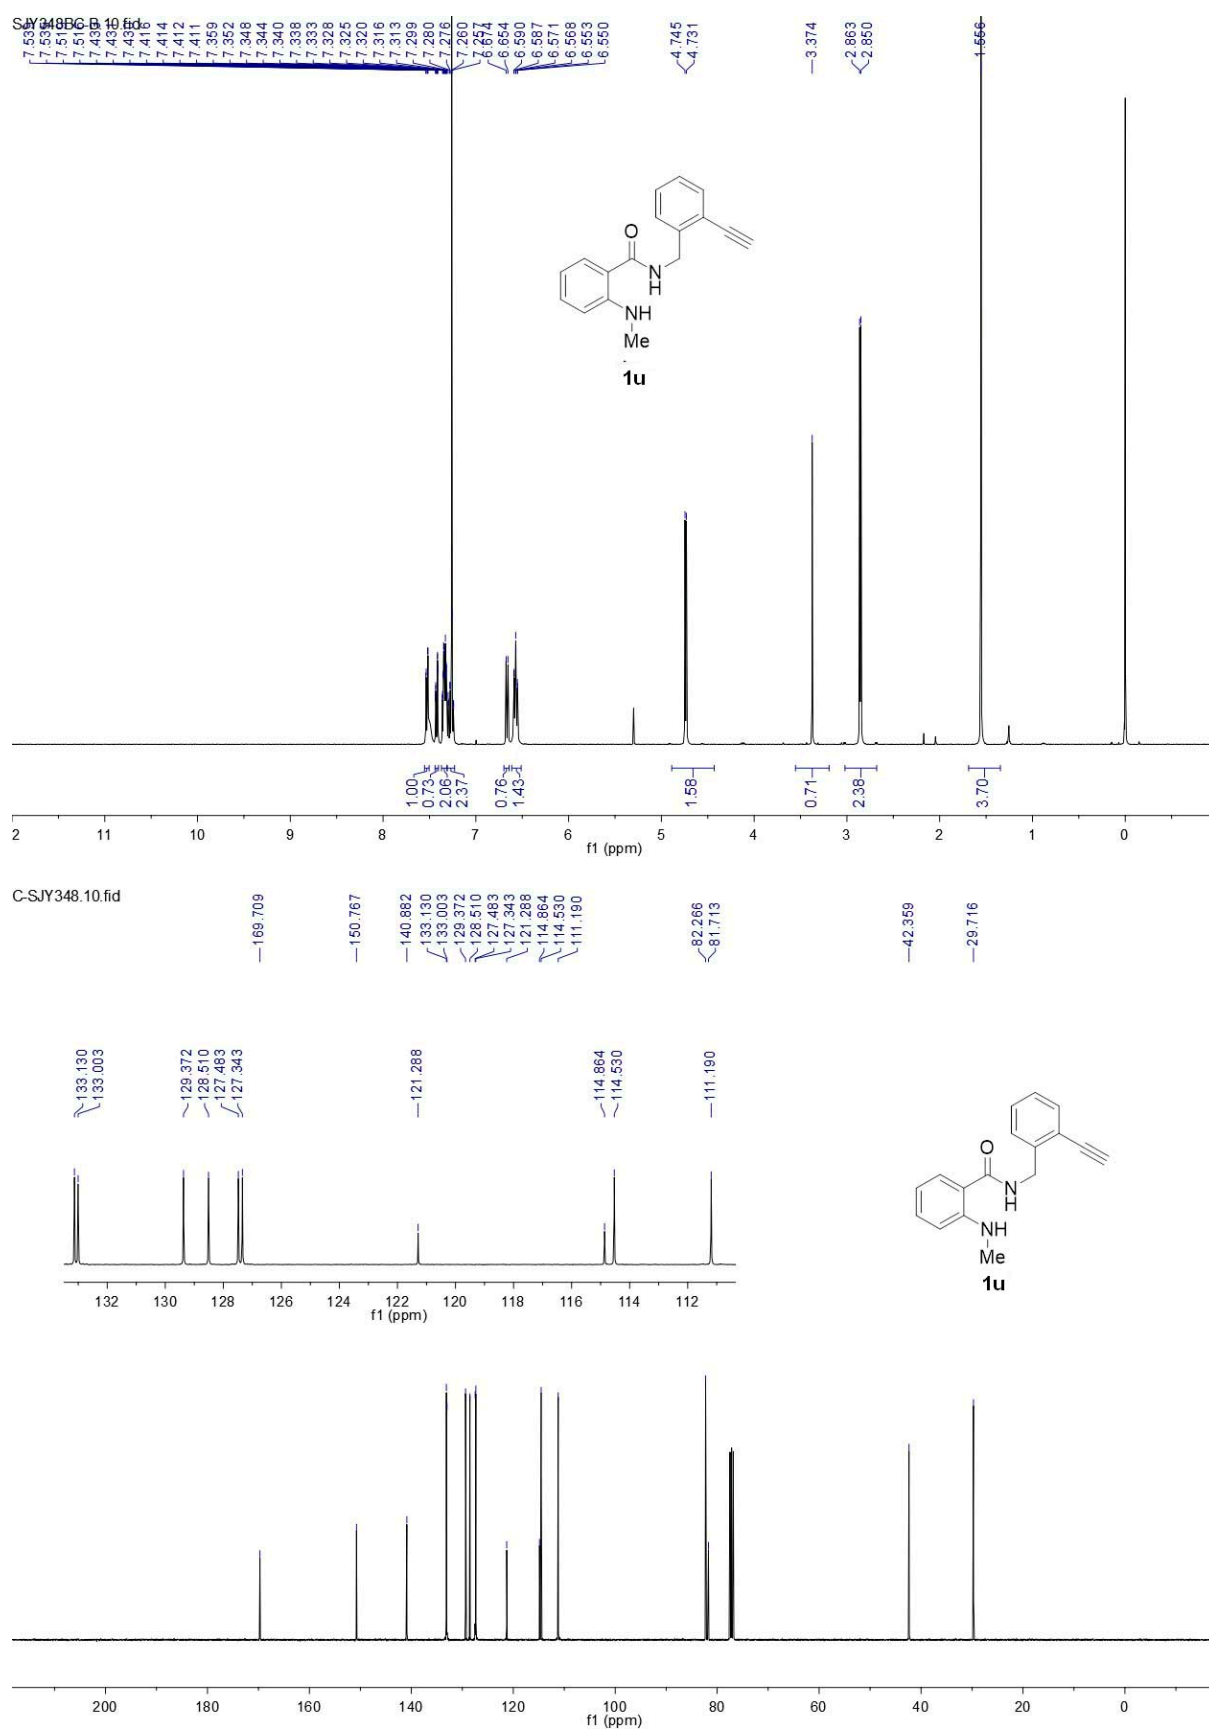

### 3.2. Spectra of Products 2a–s

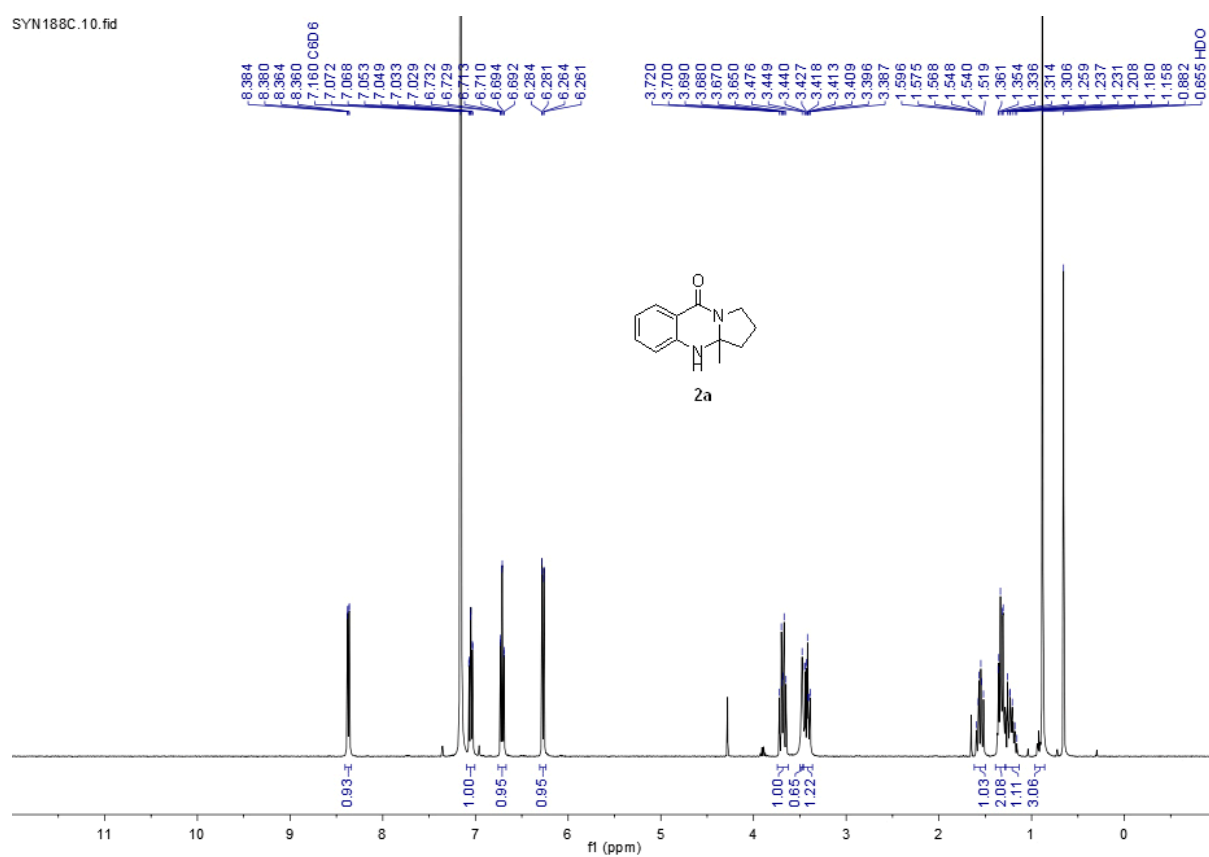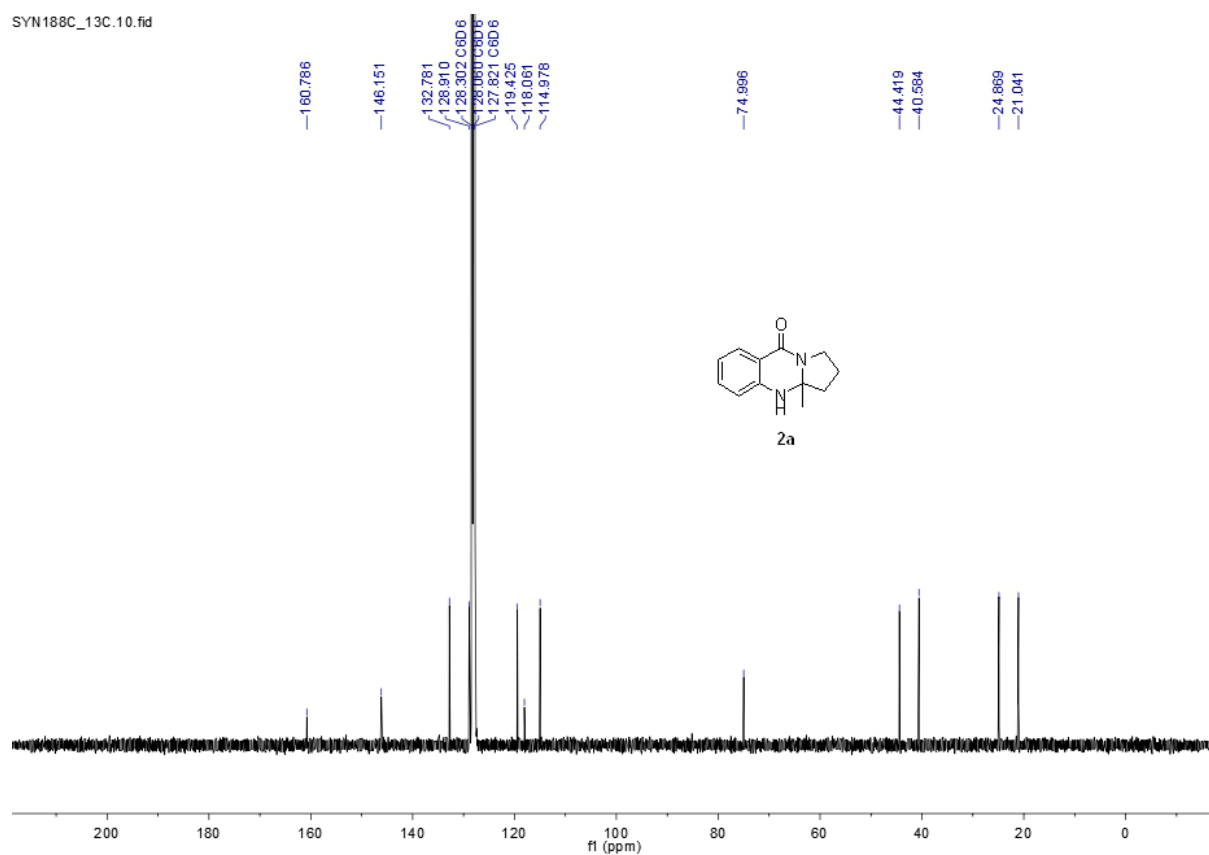

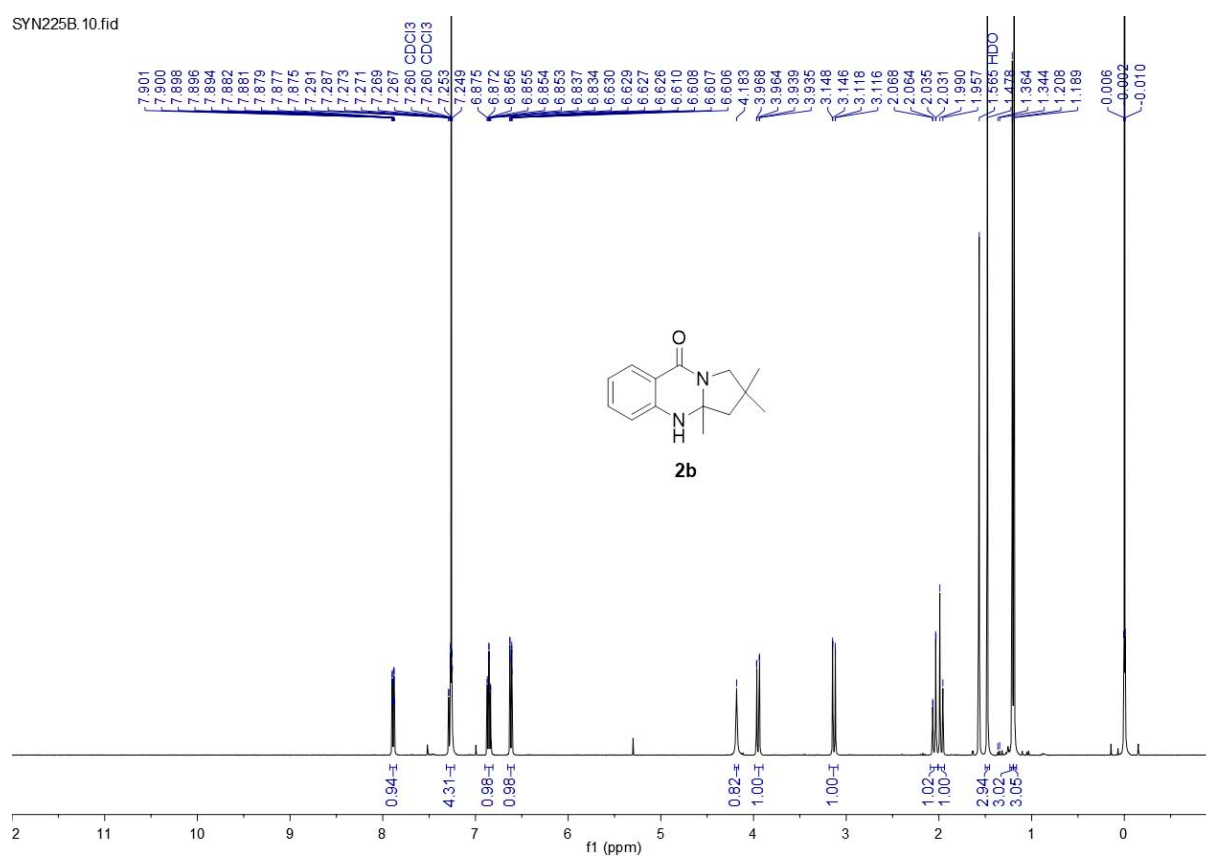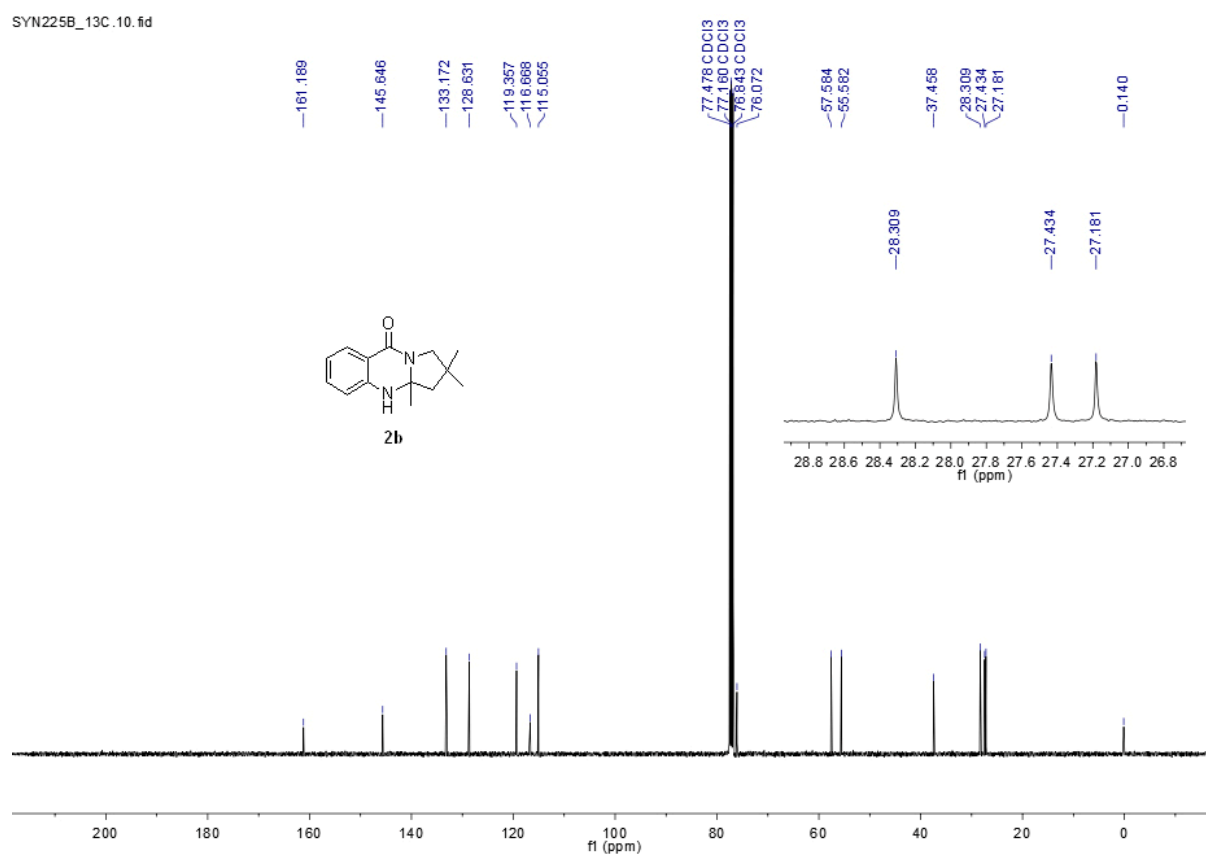

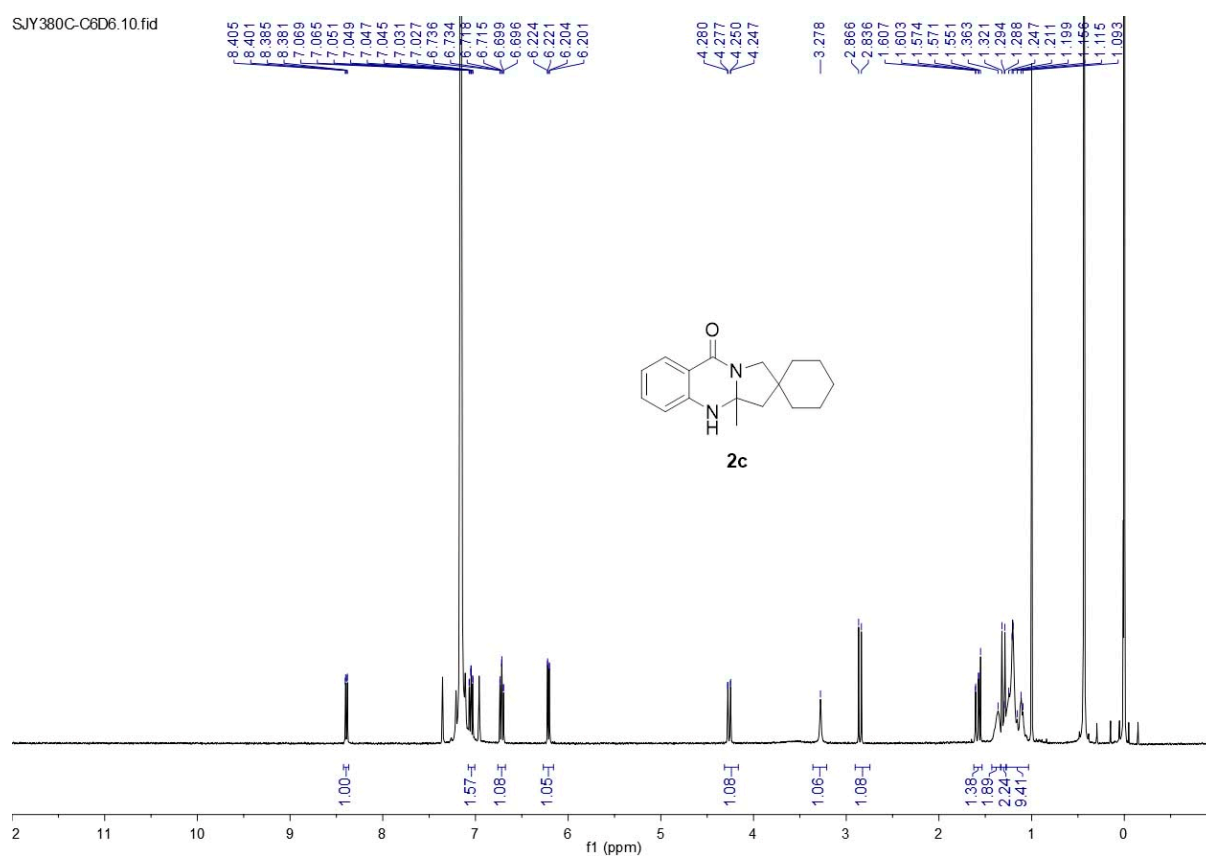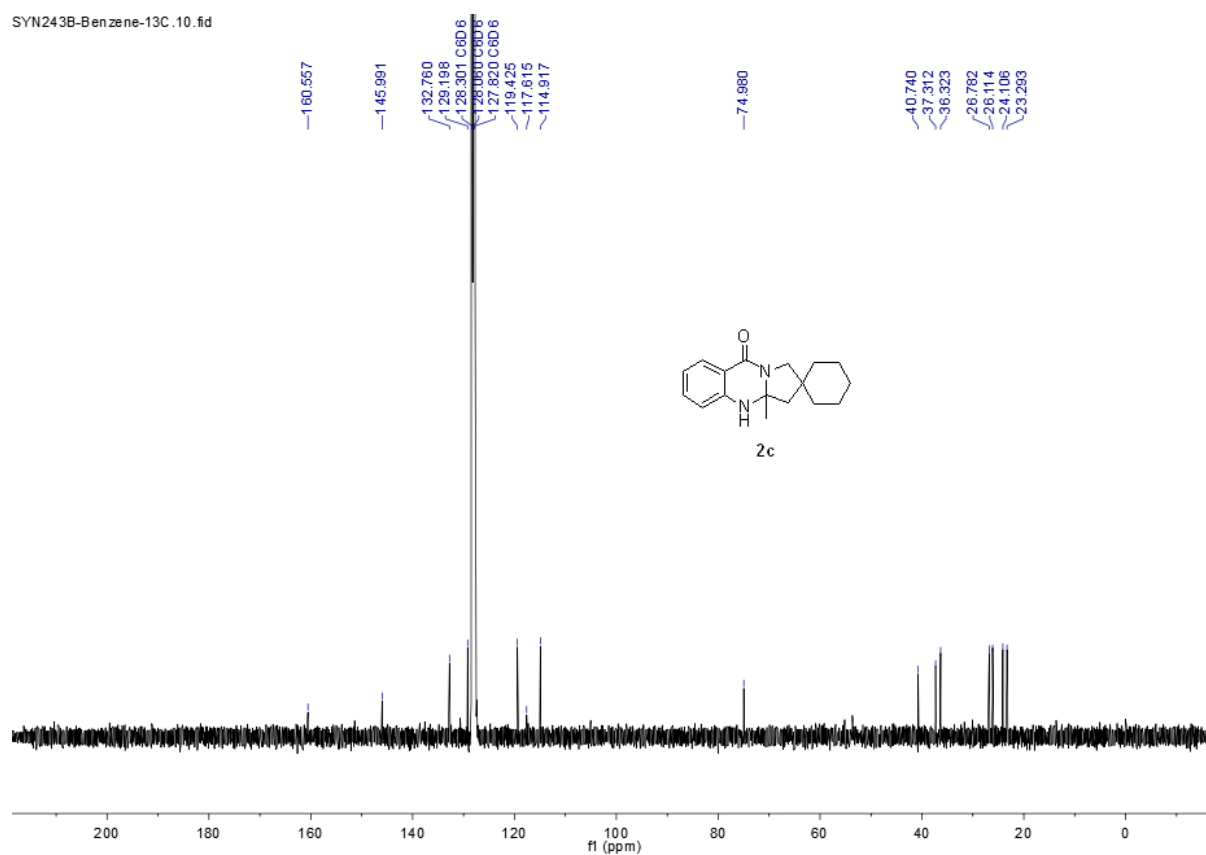

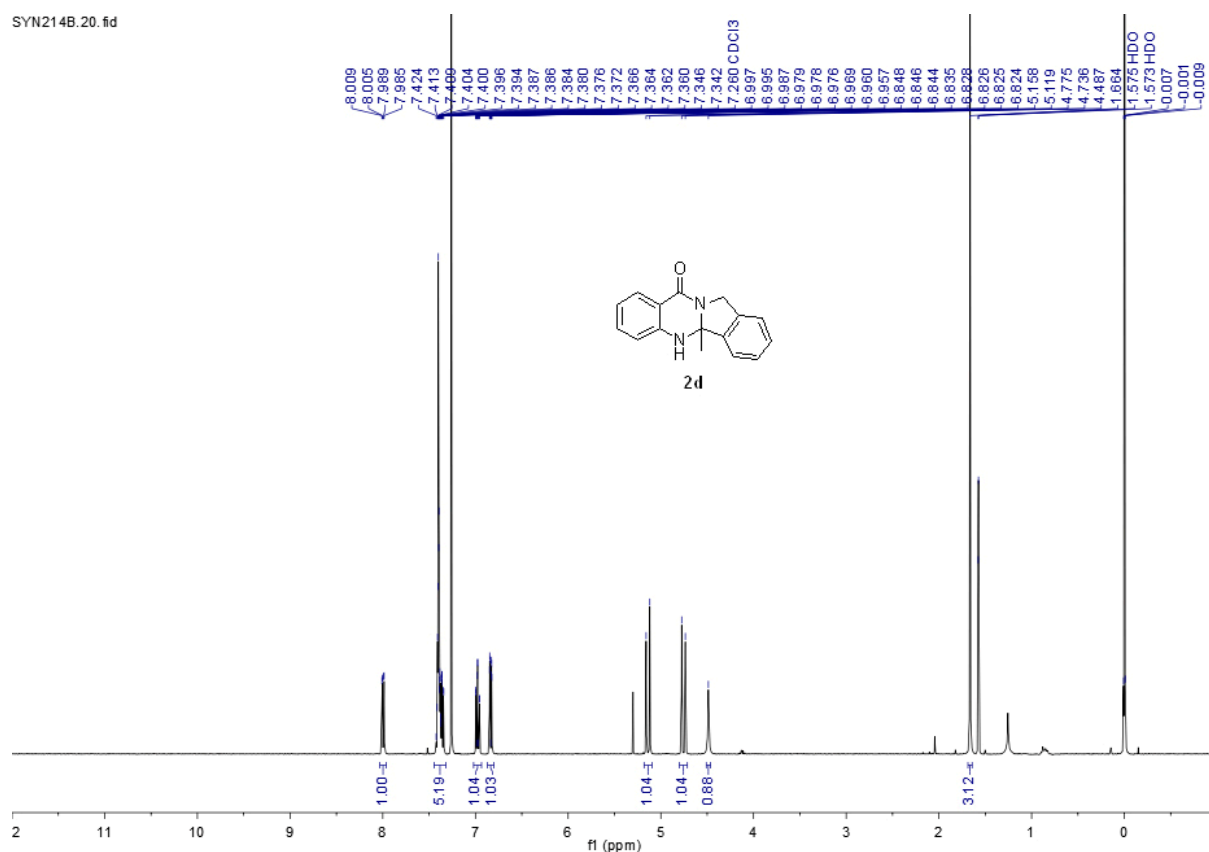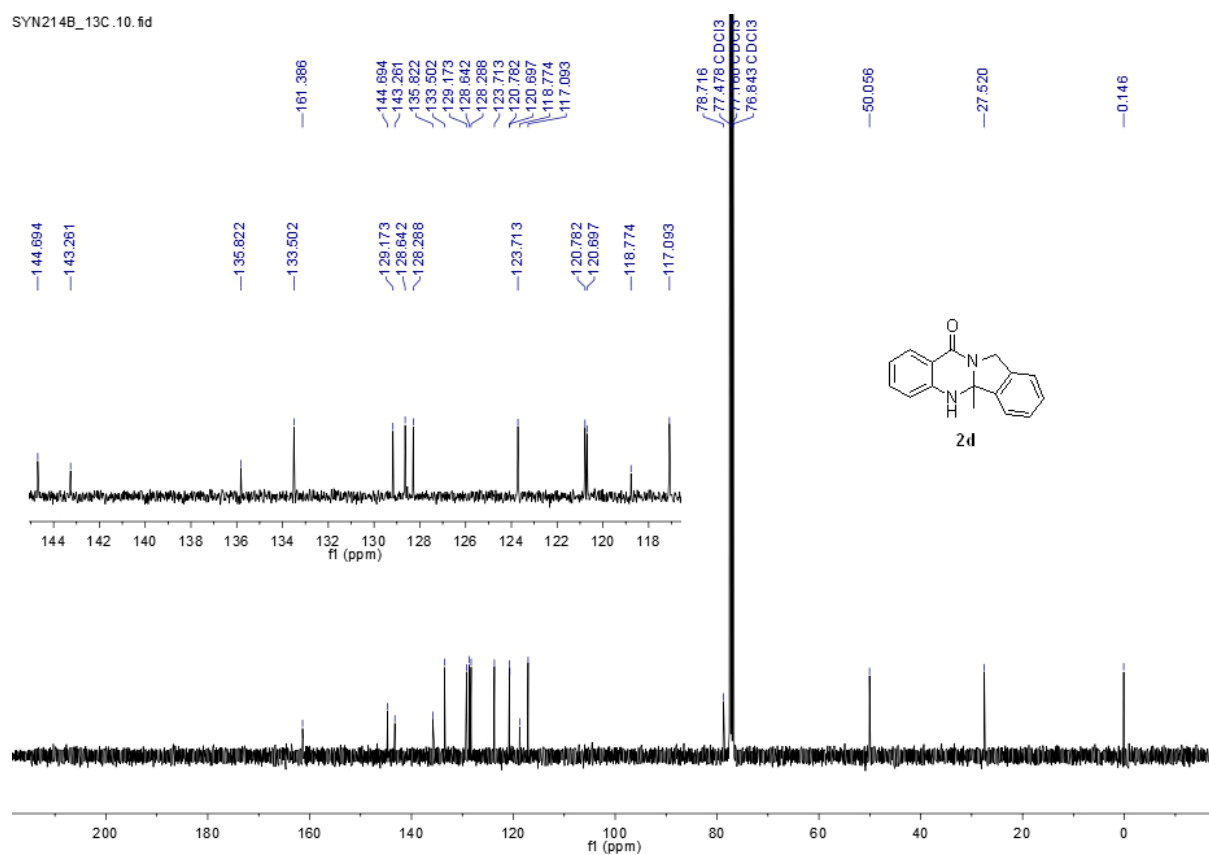

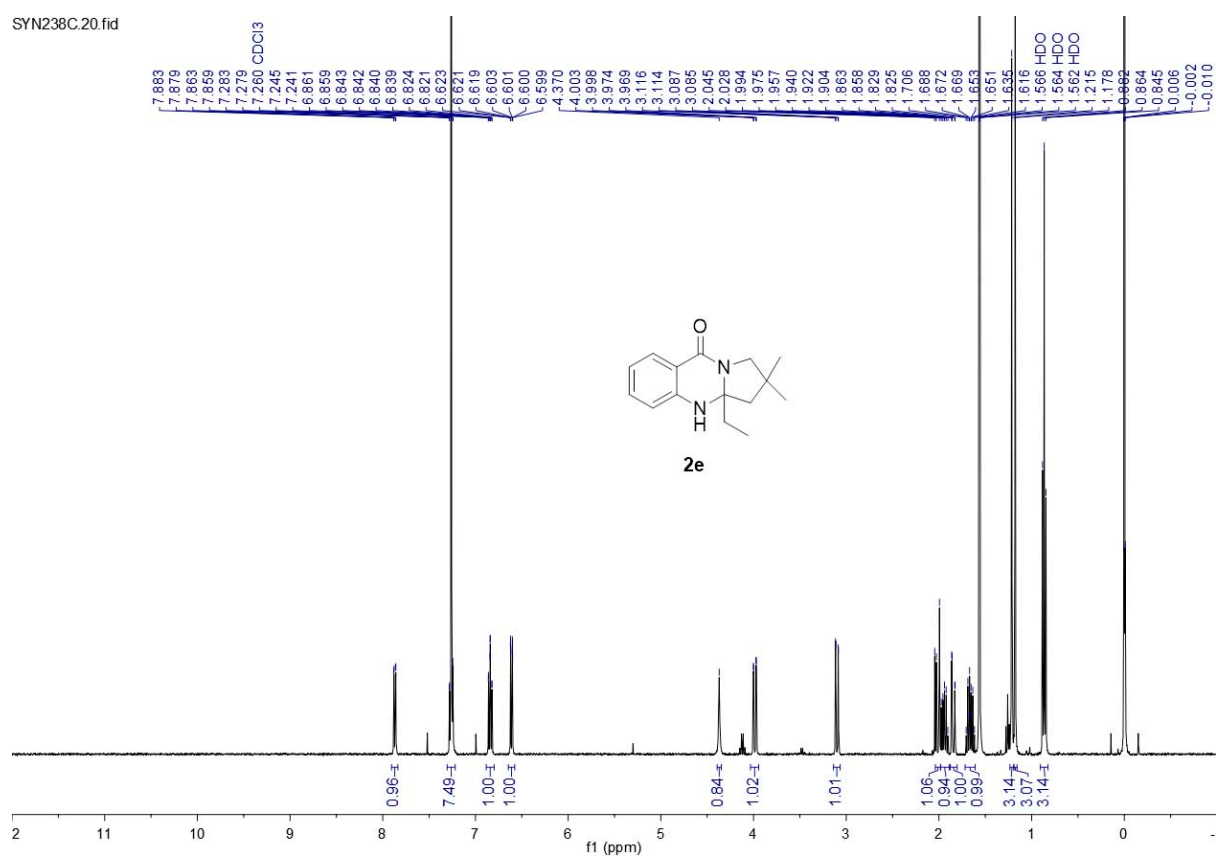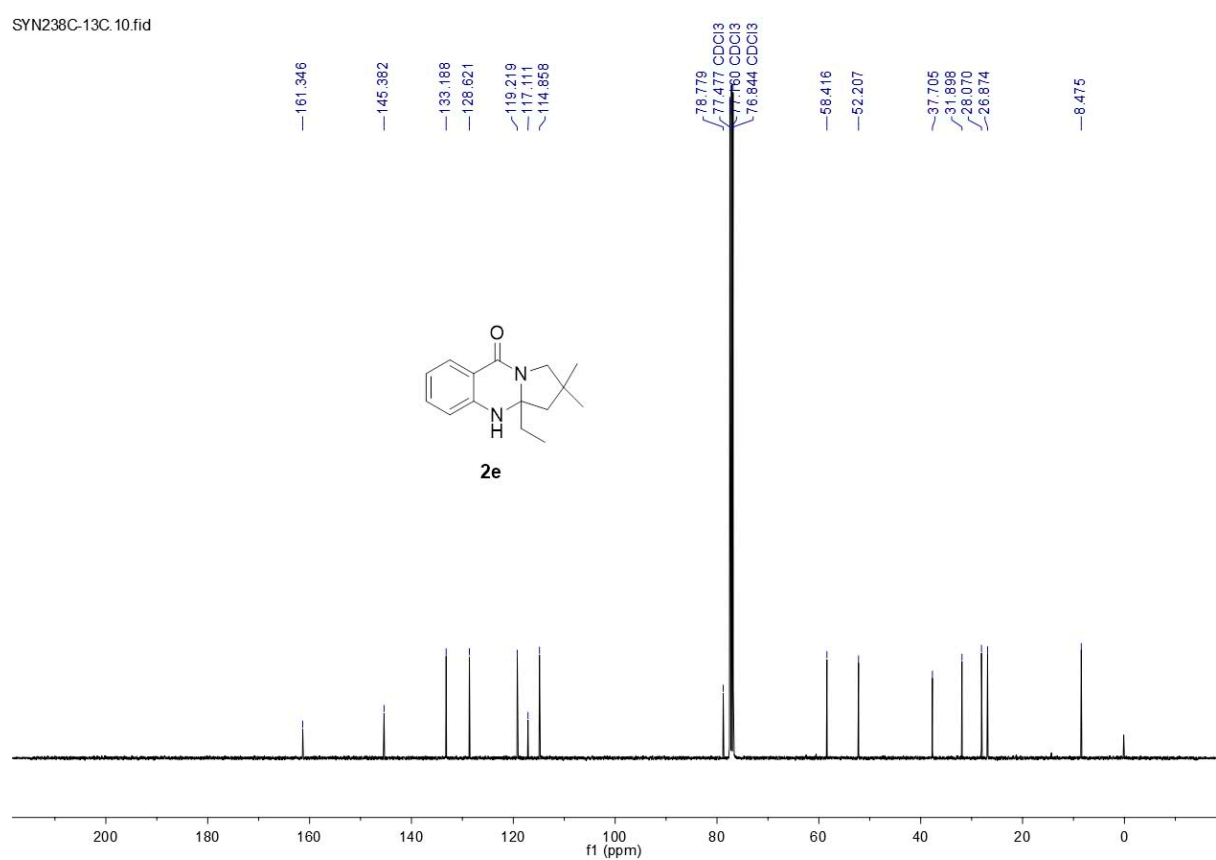



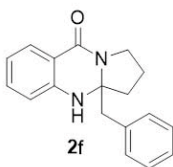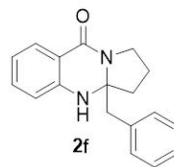

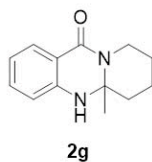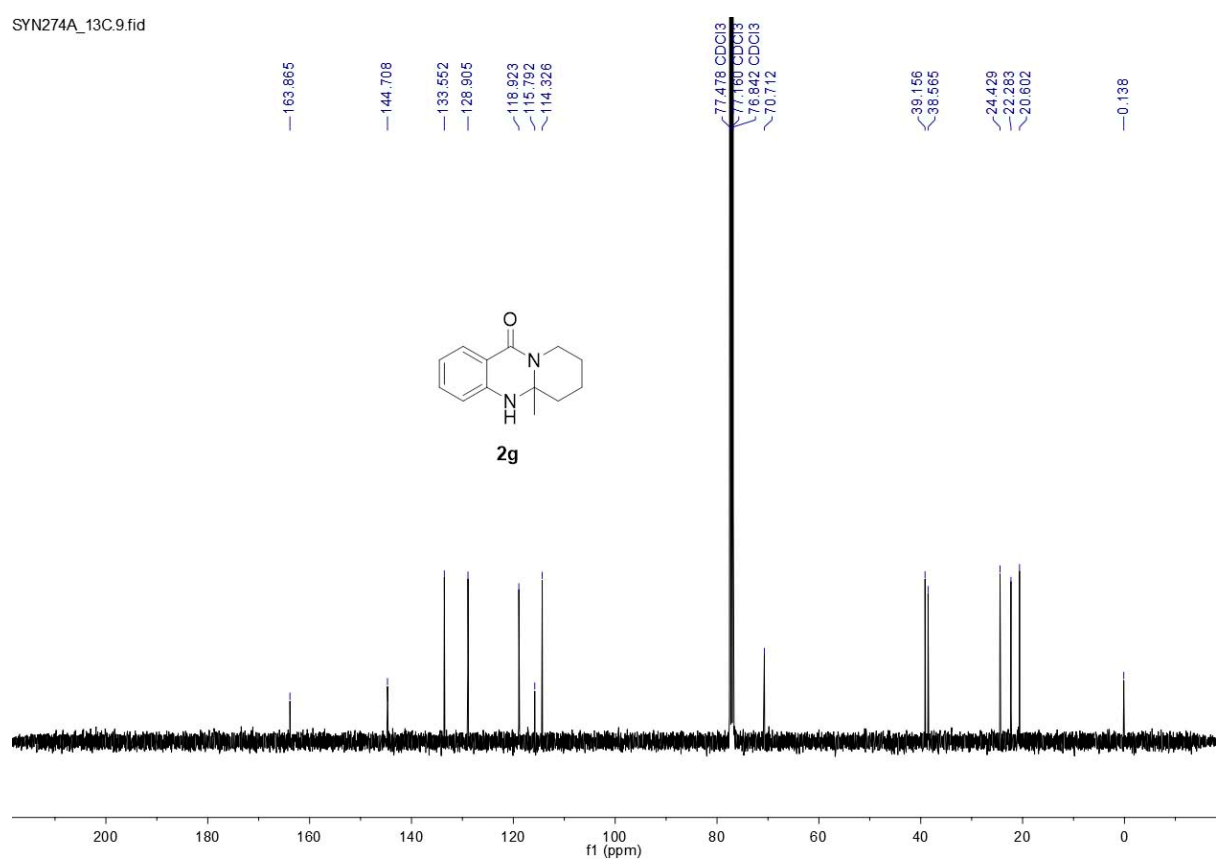

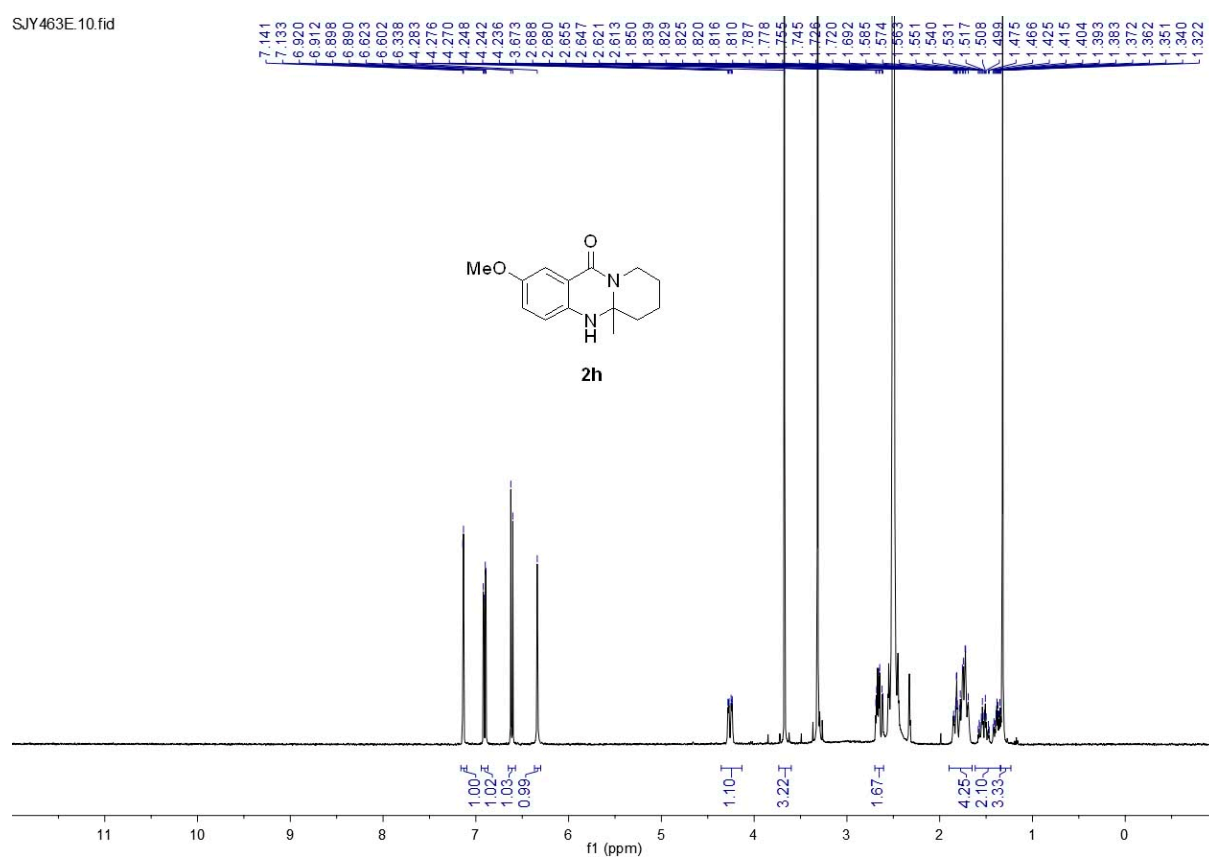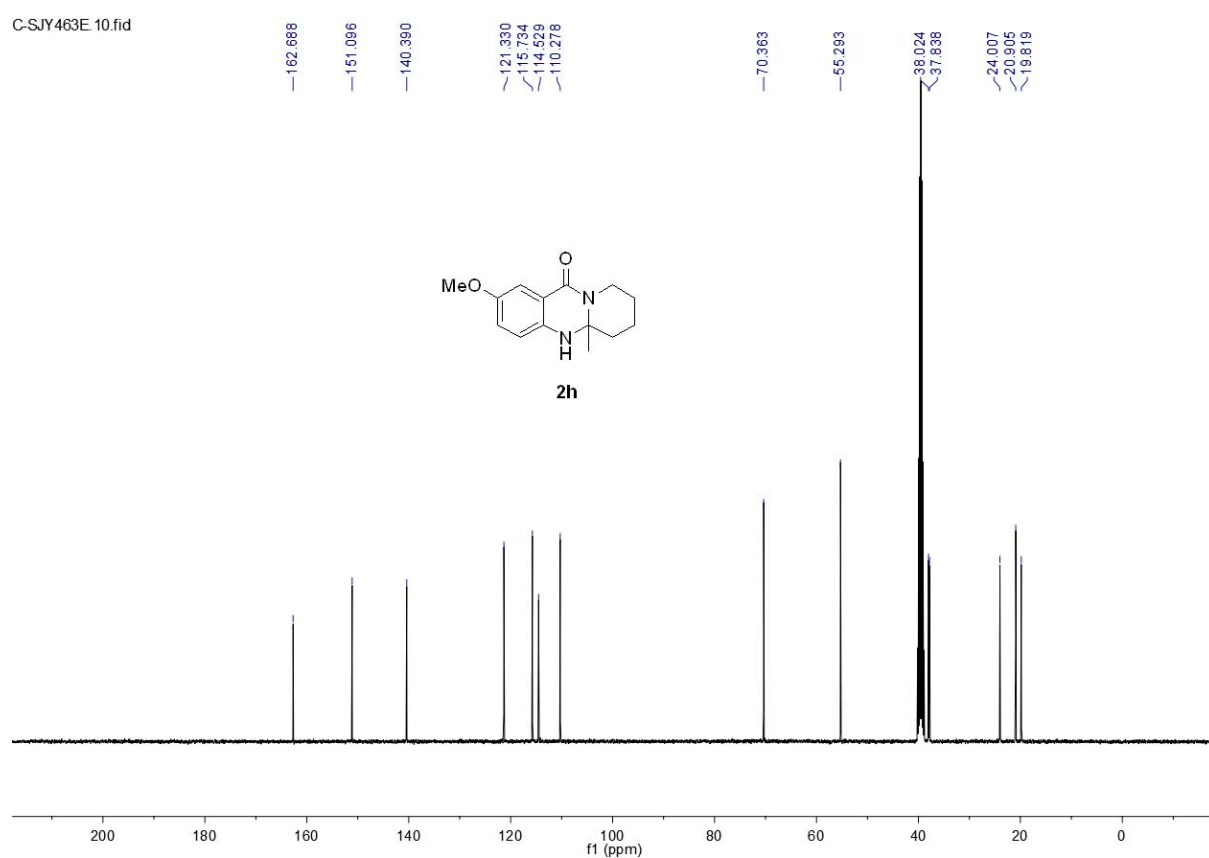

SJY464E.10.fid

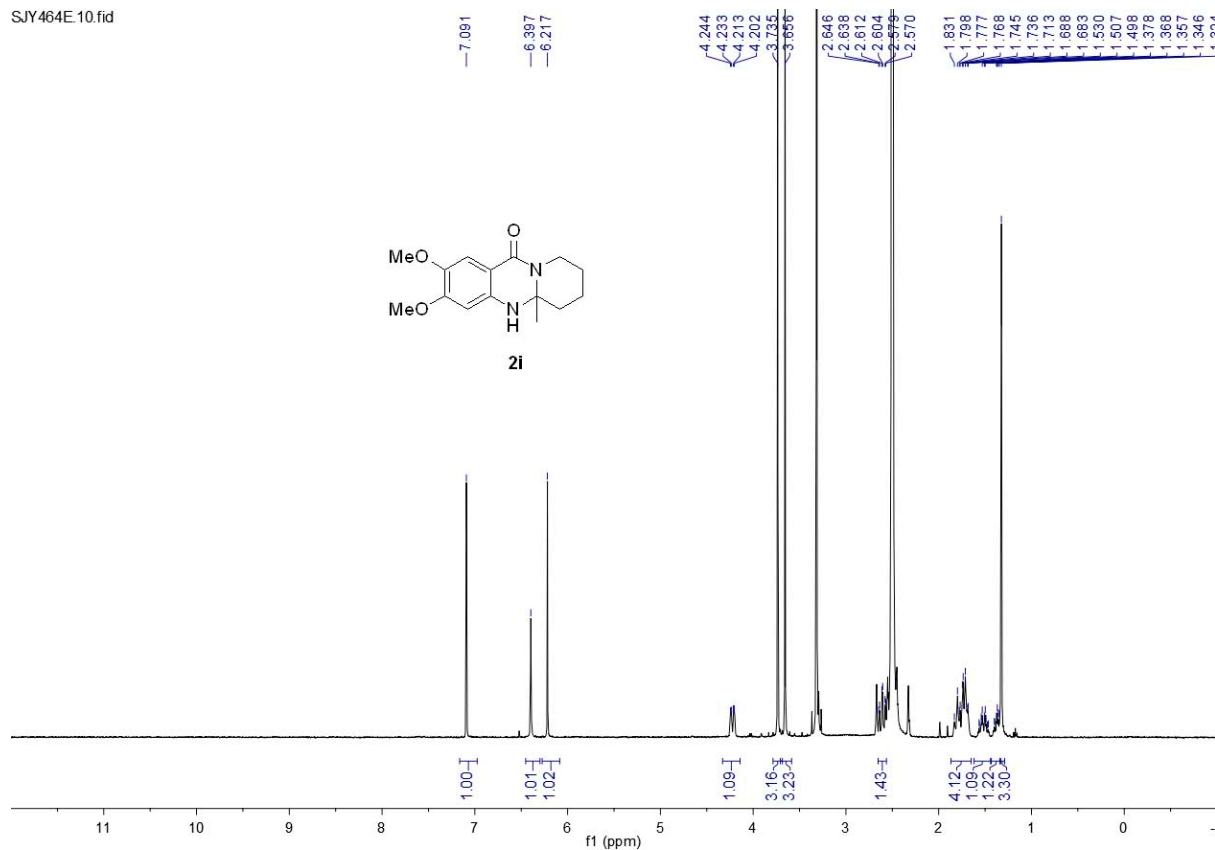

C-SJY464E.10.fid

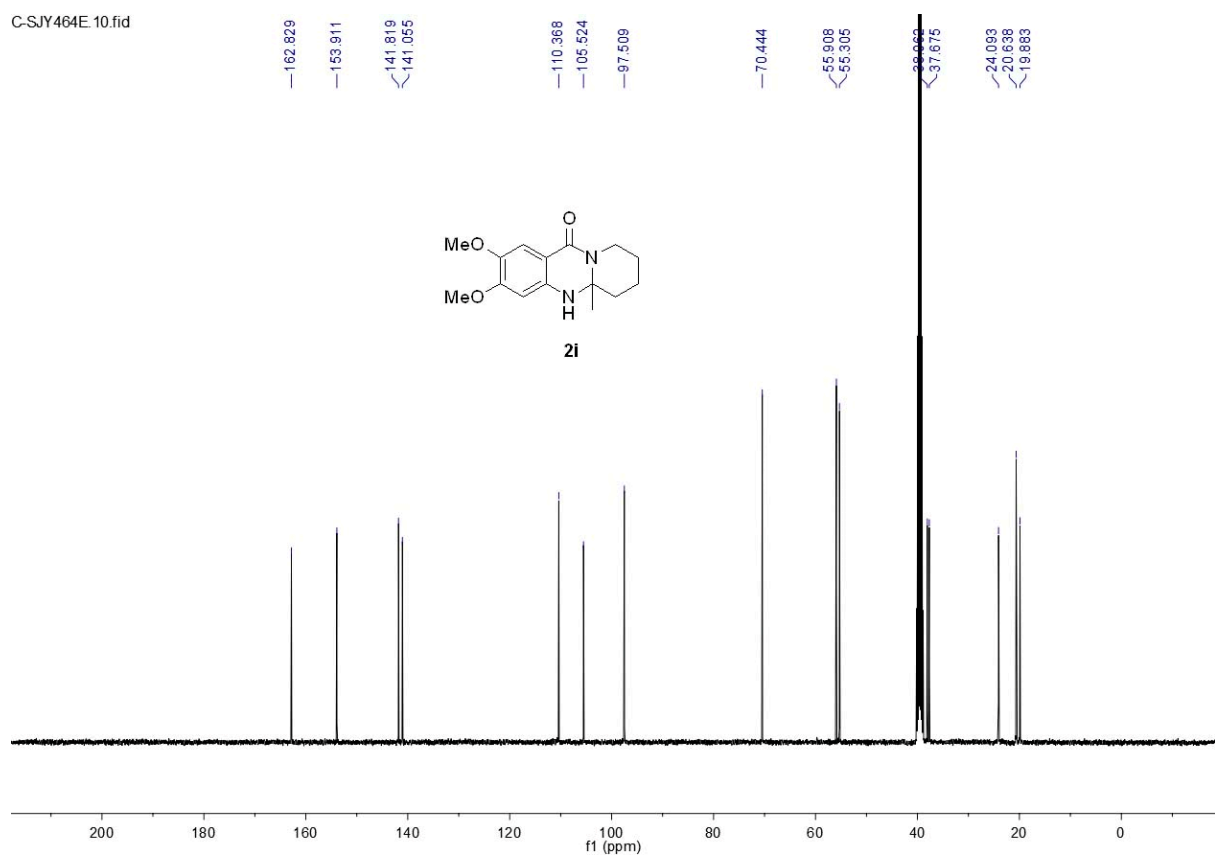

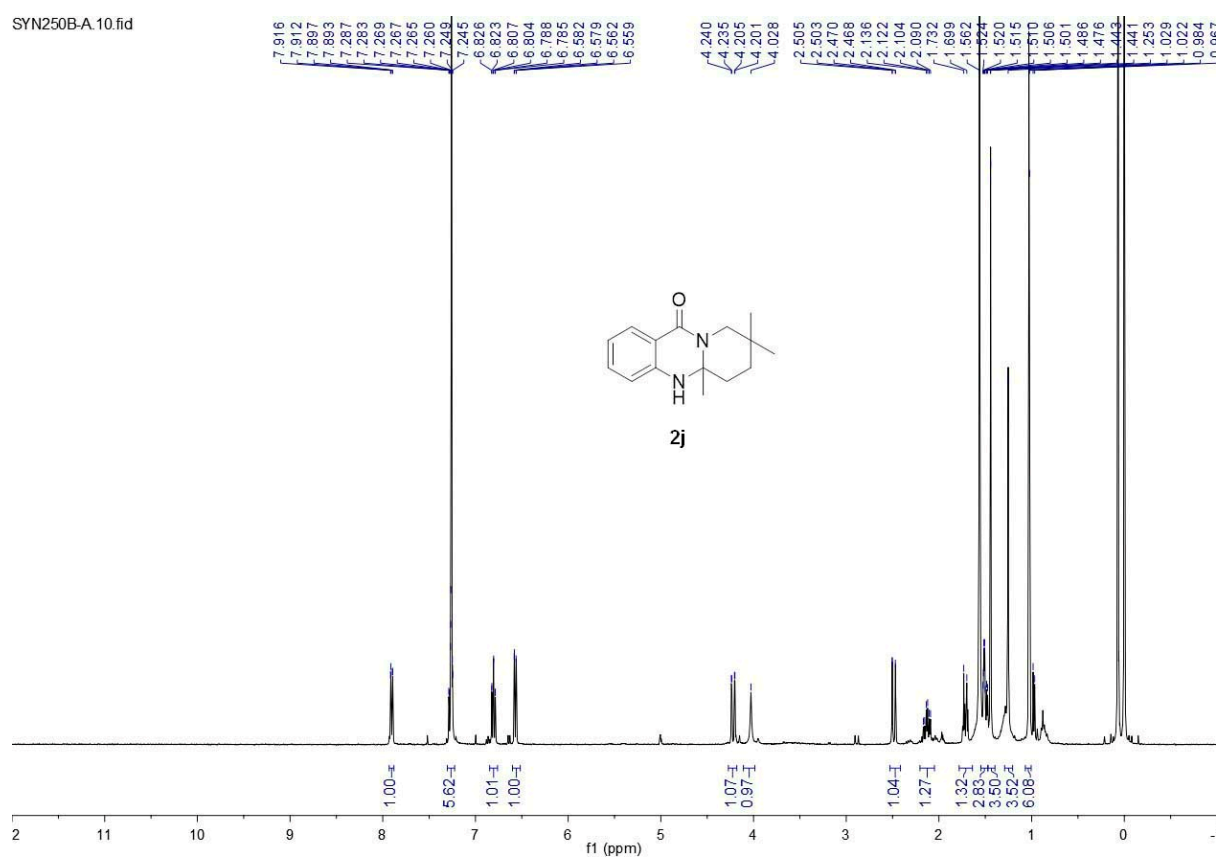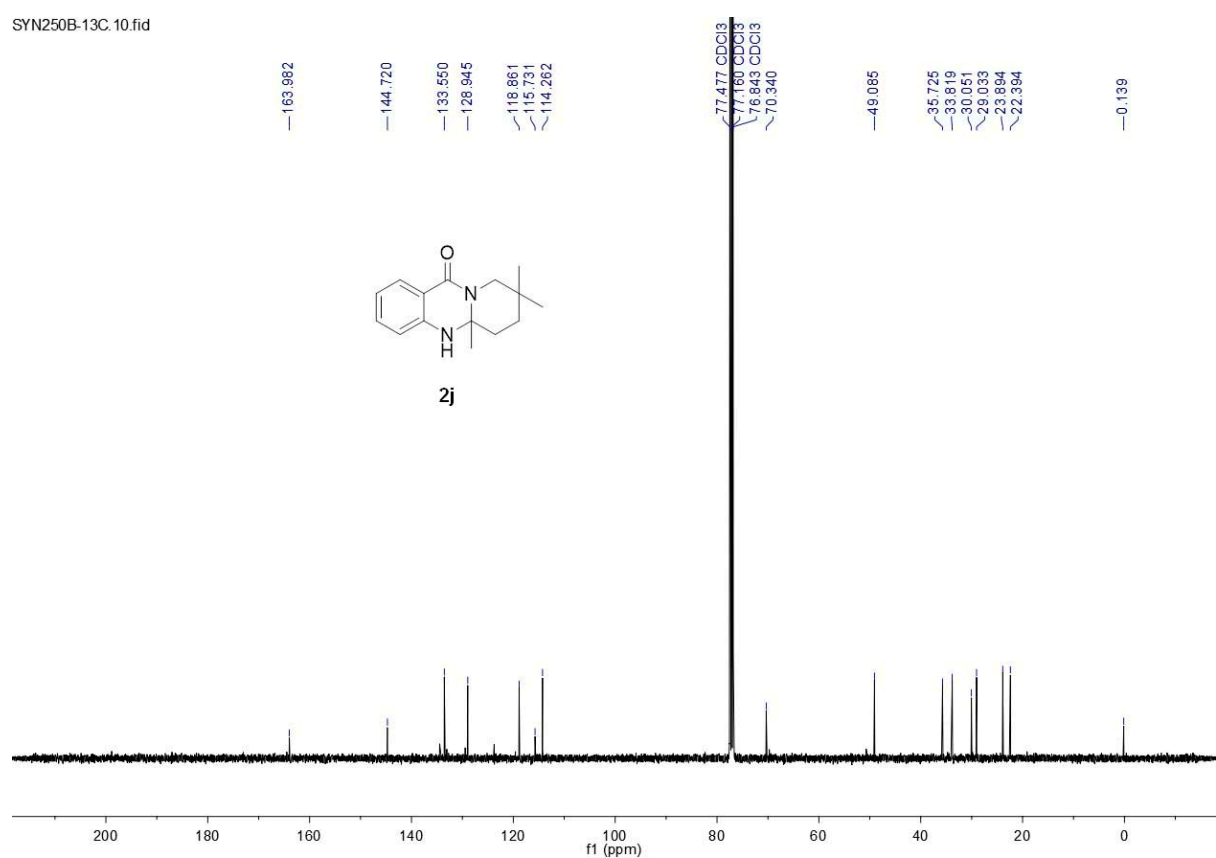

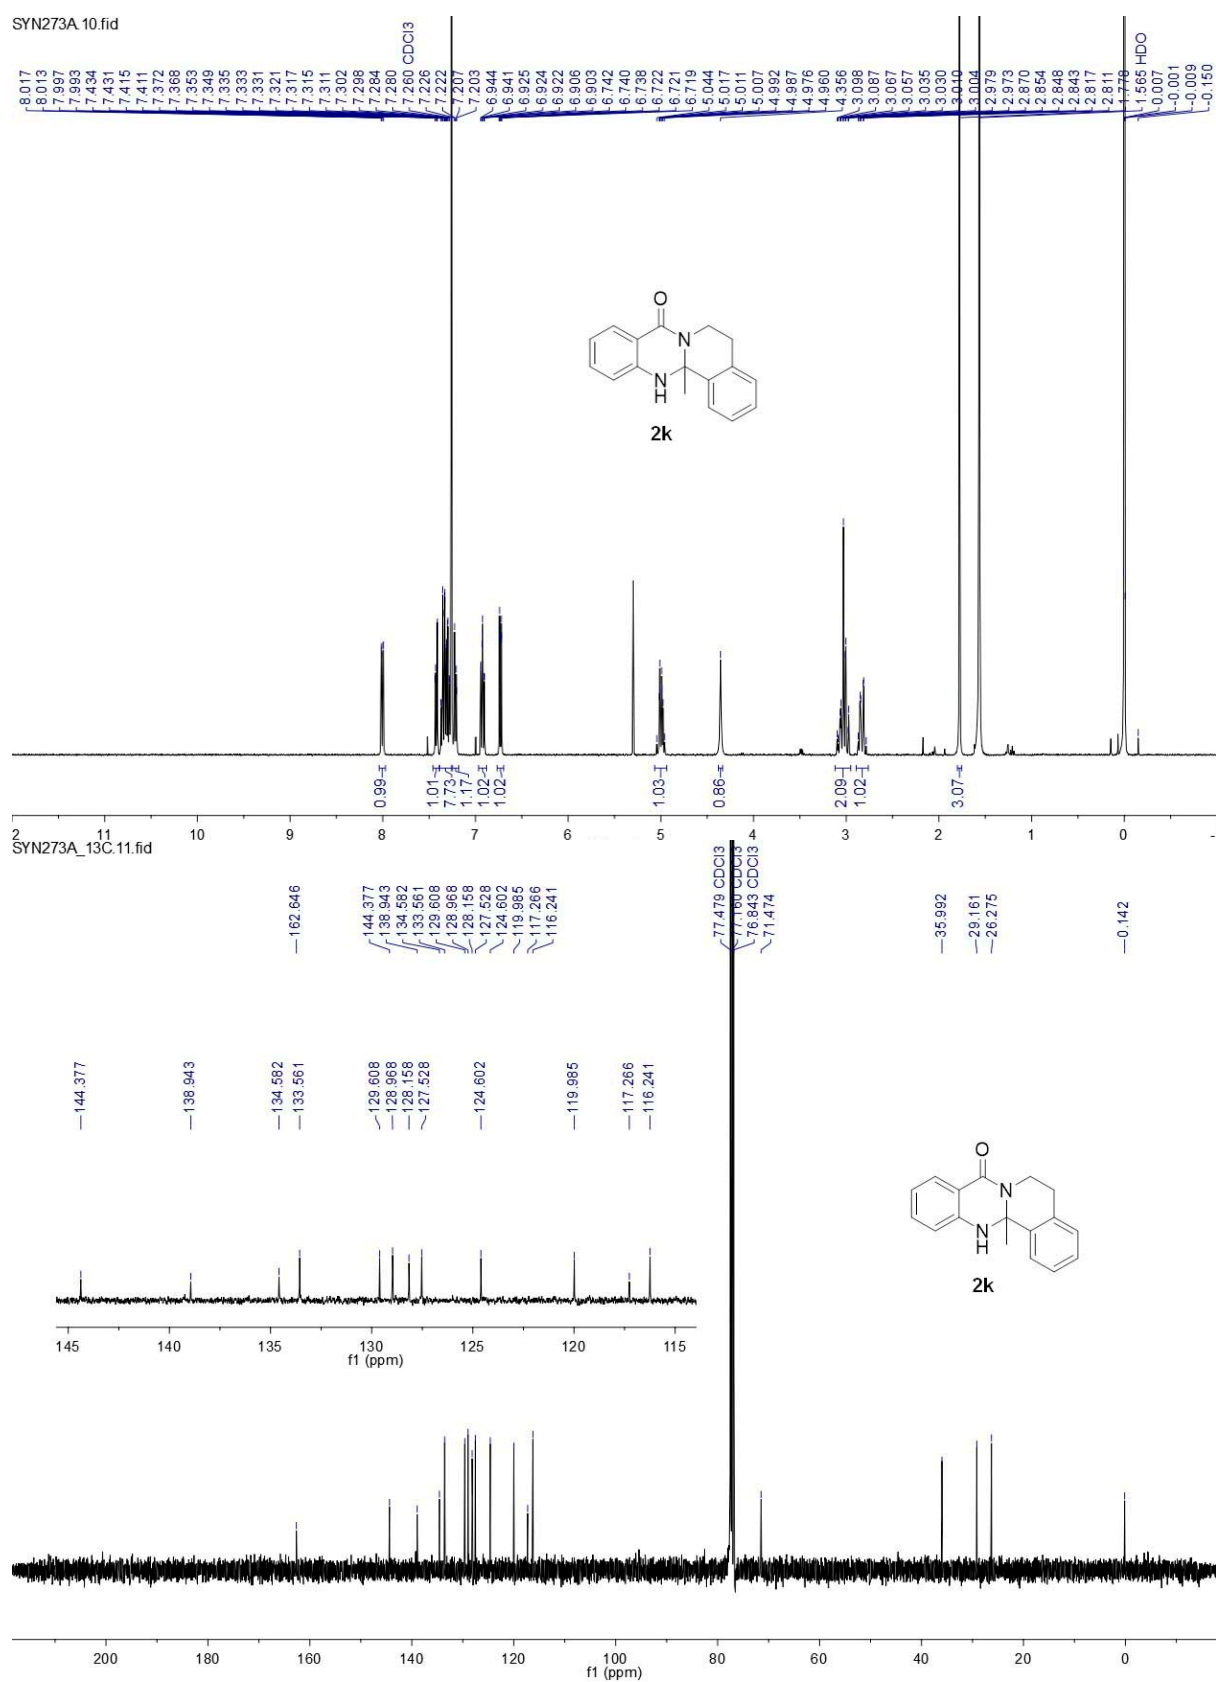

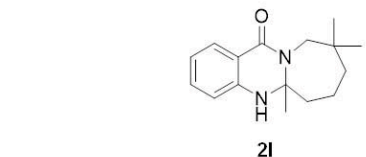

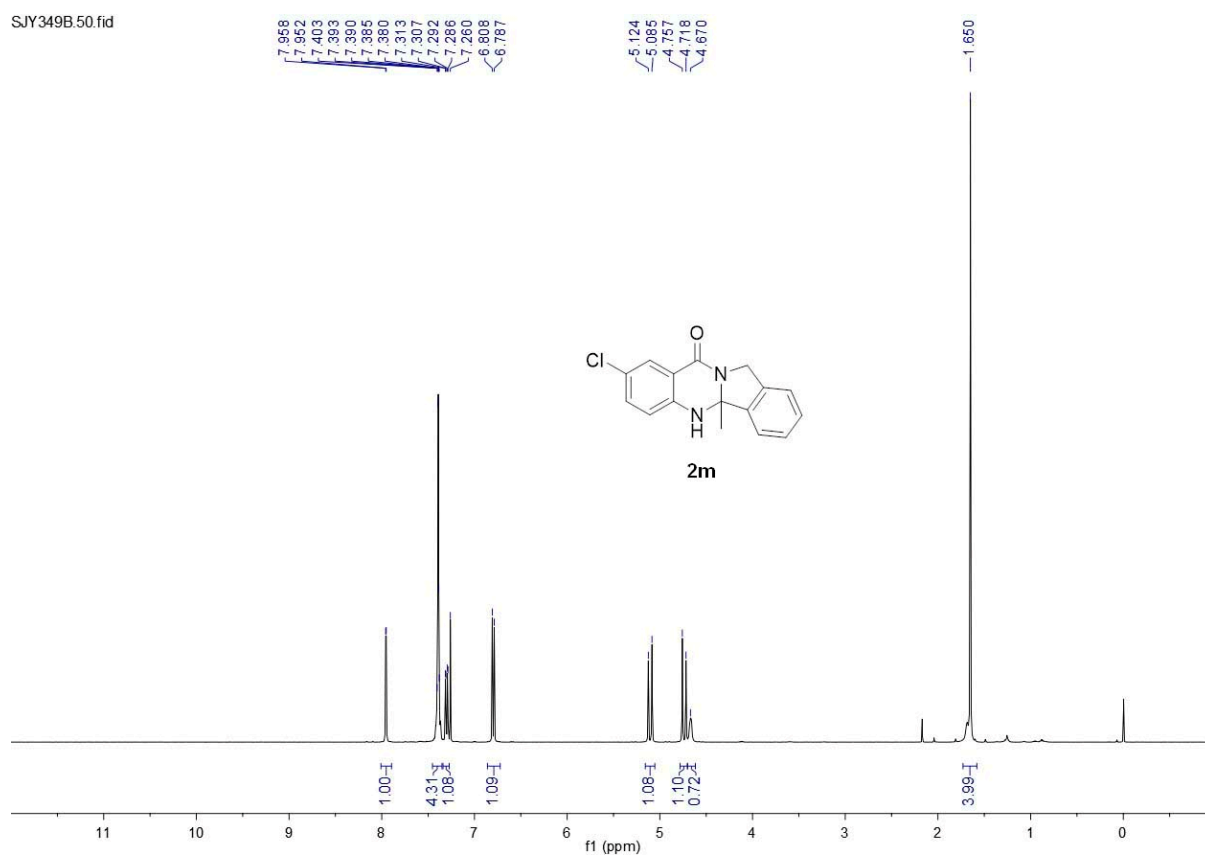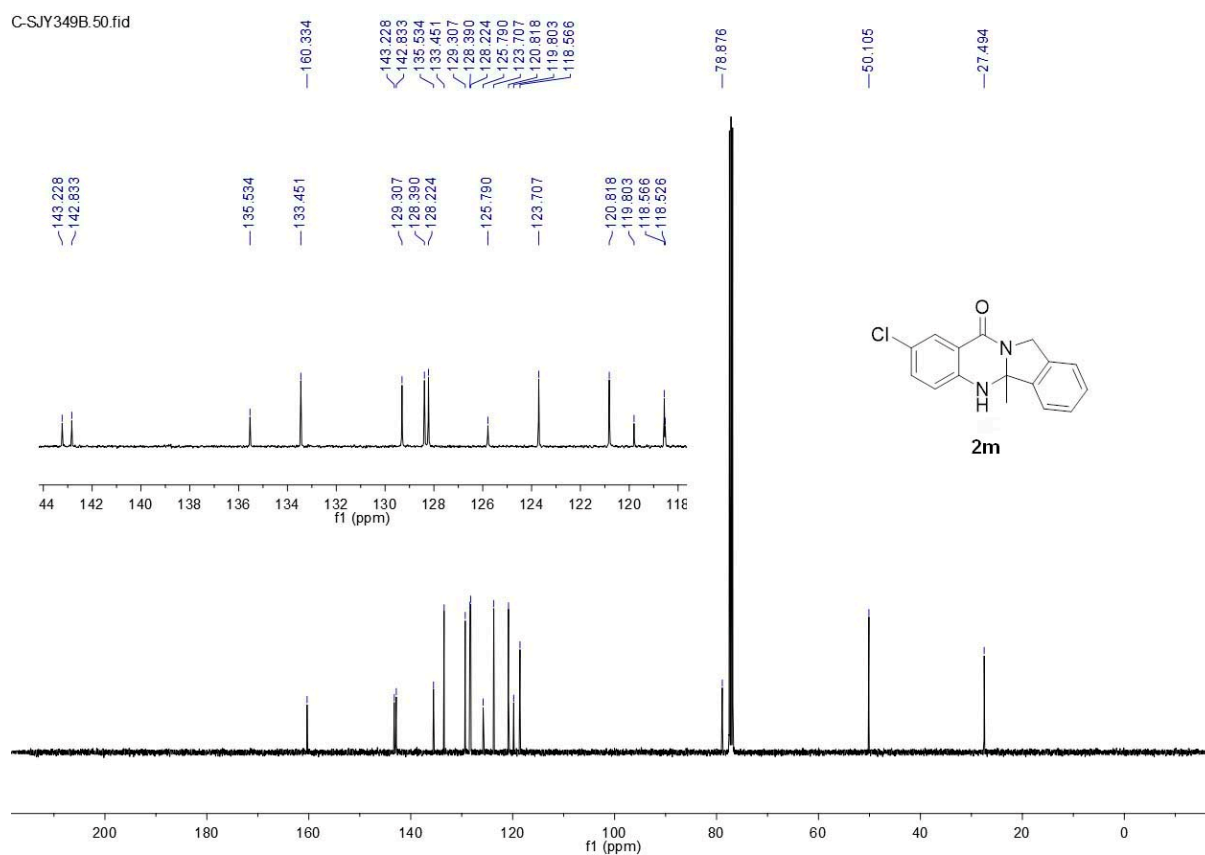



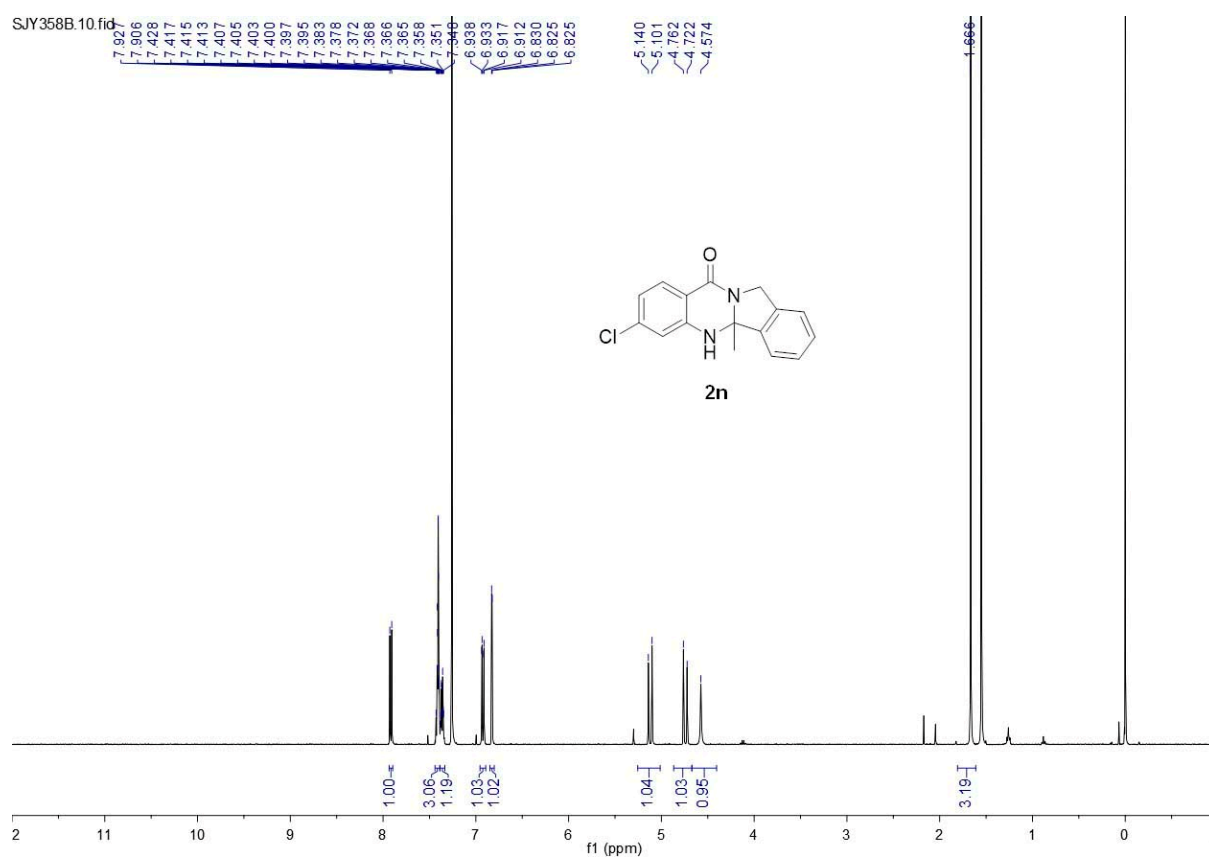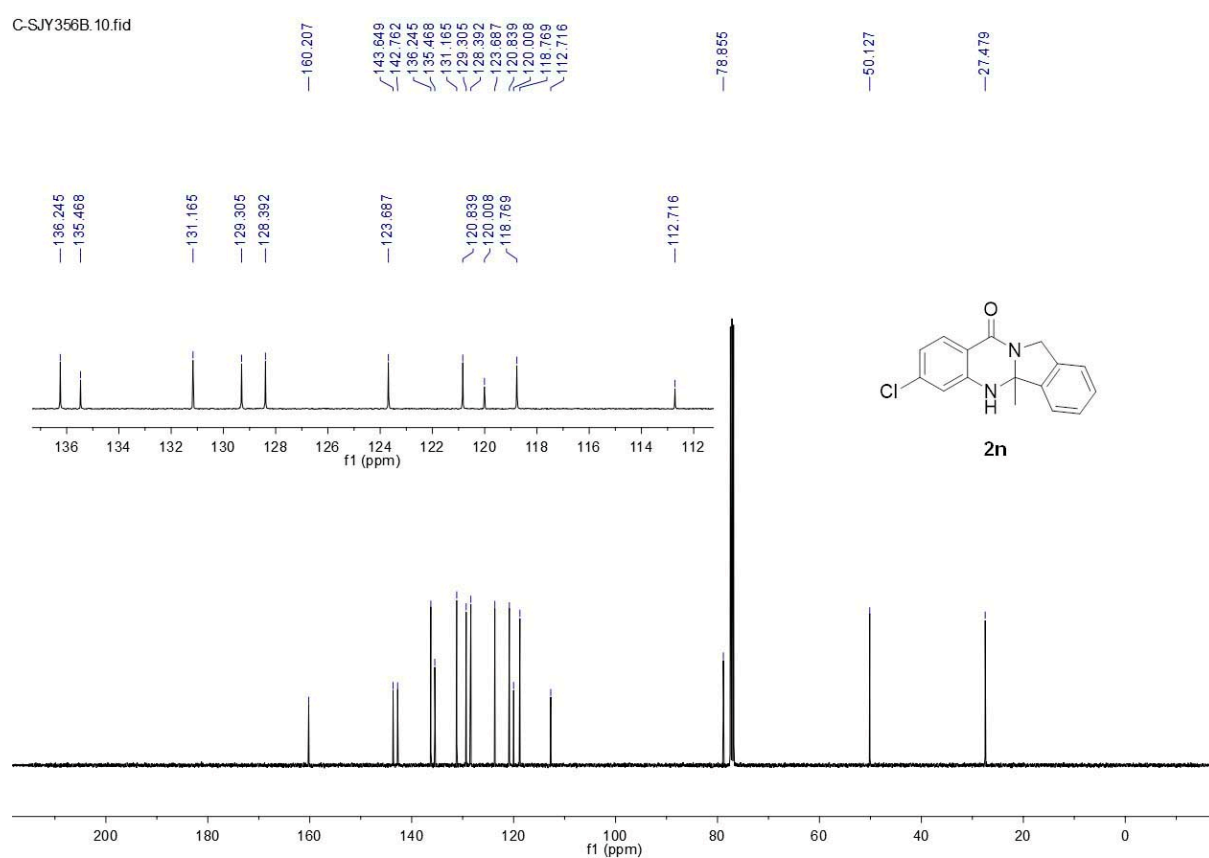

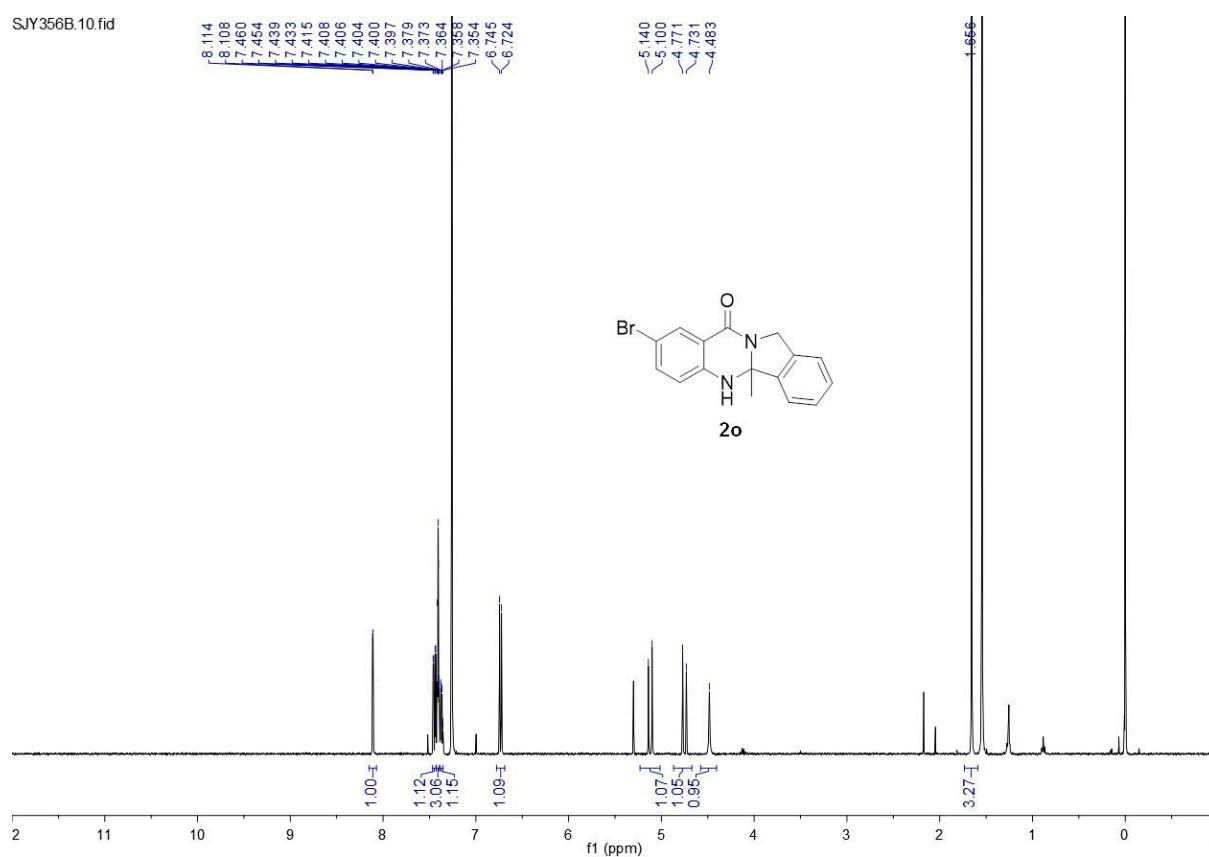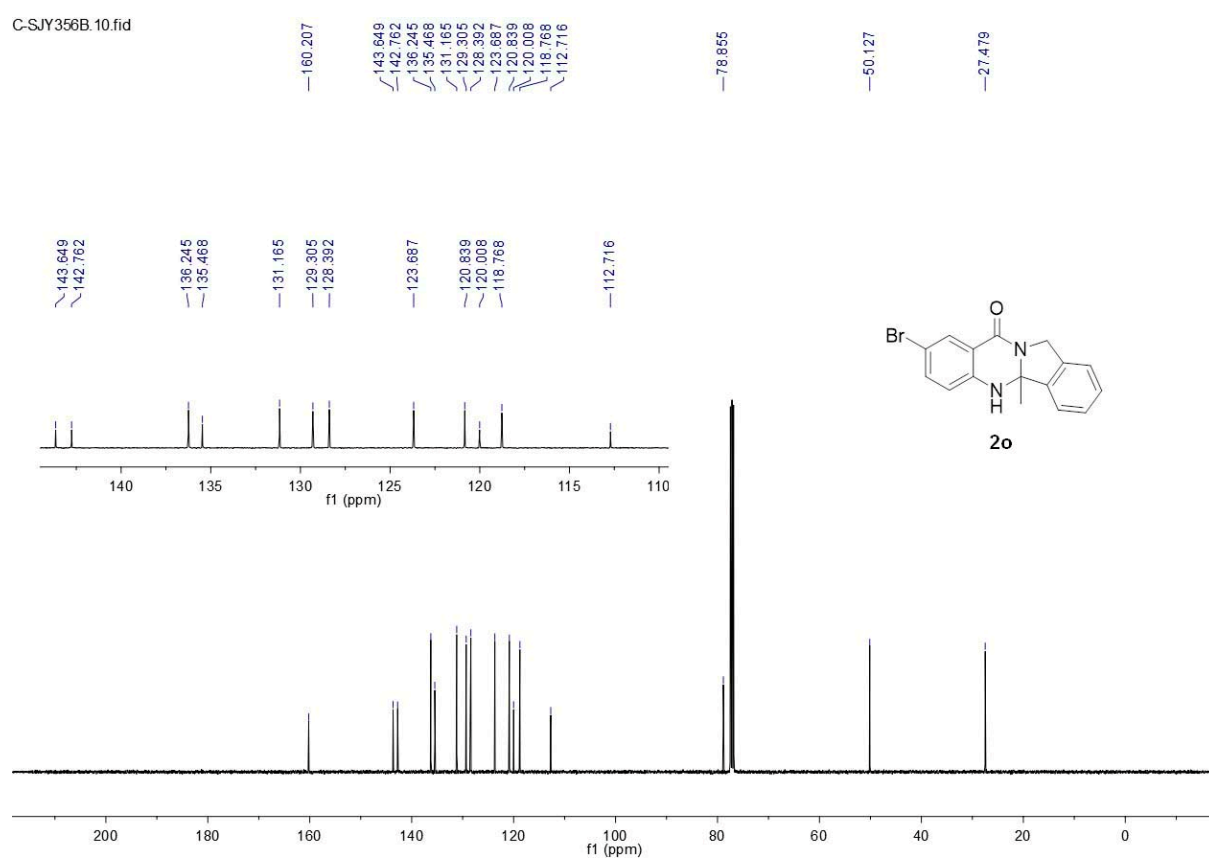

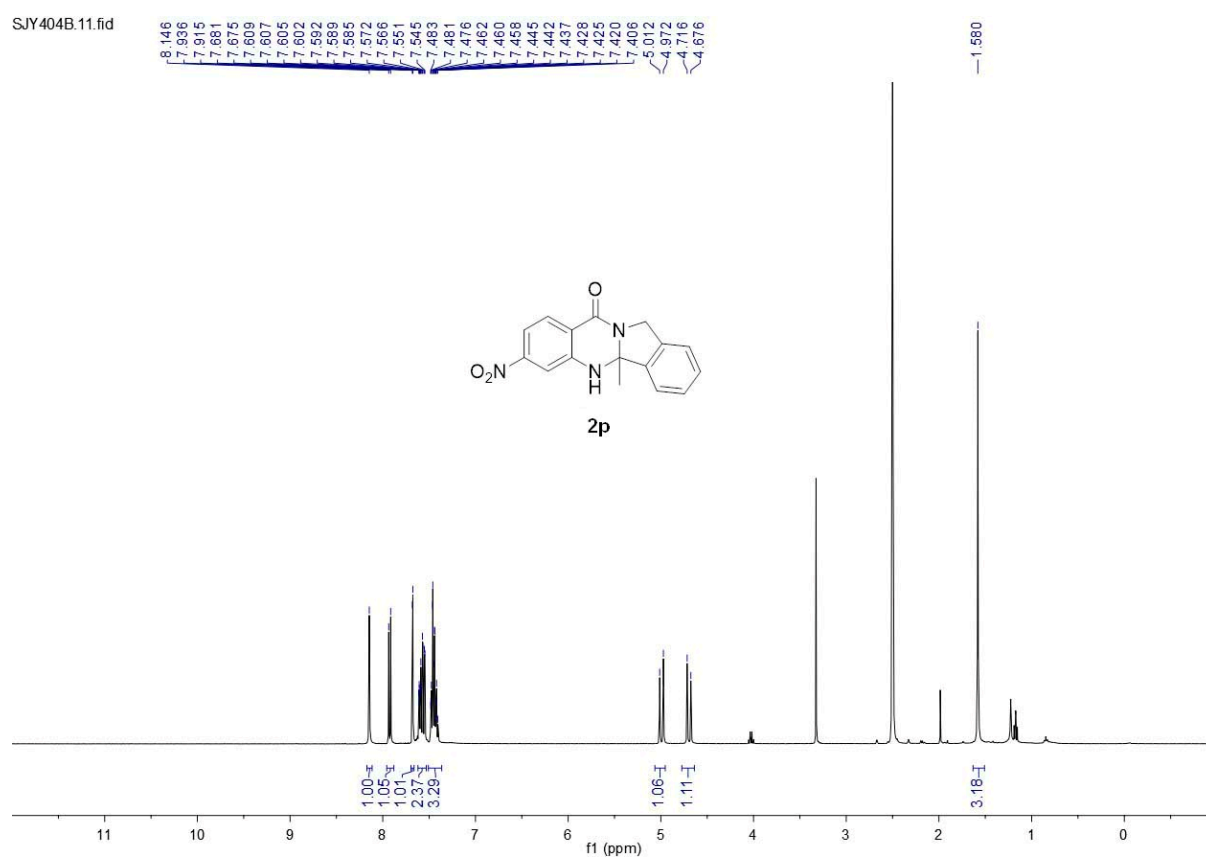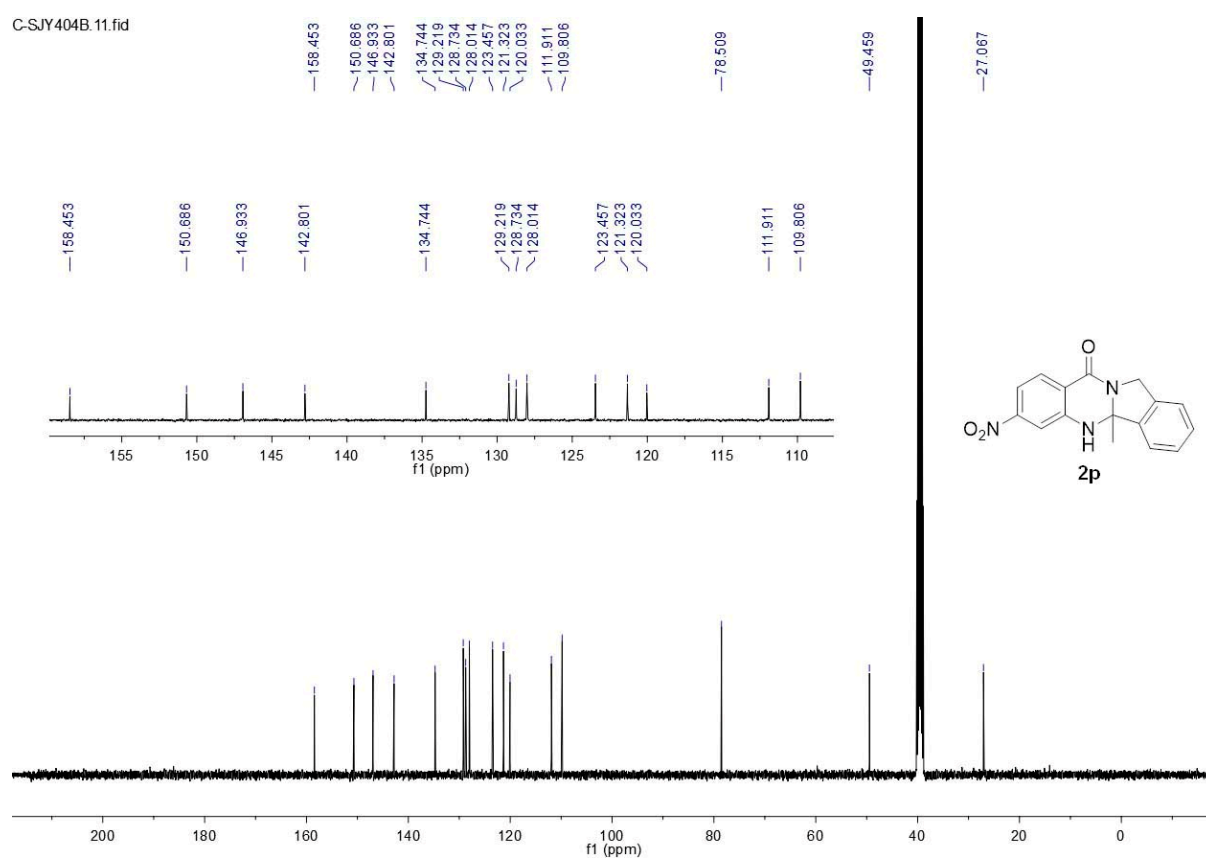

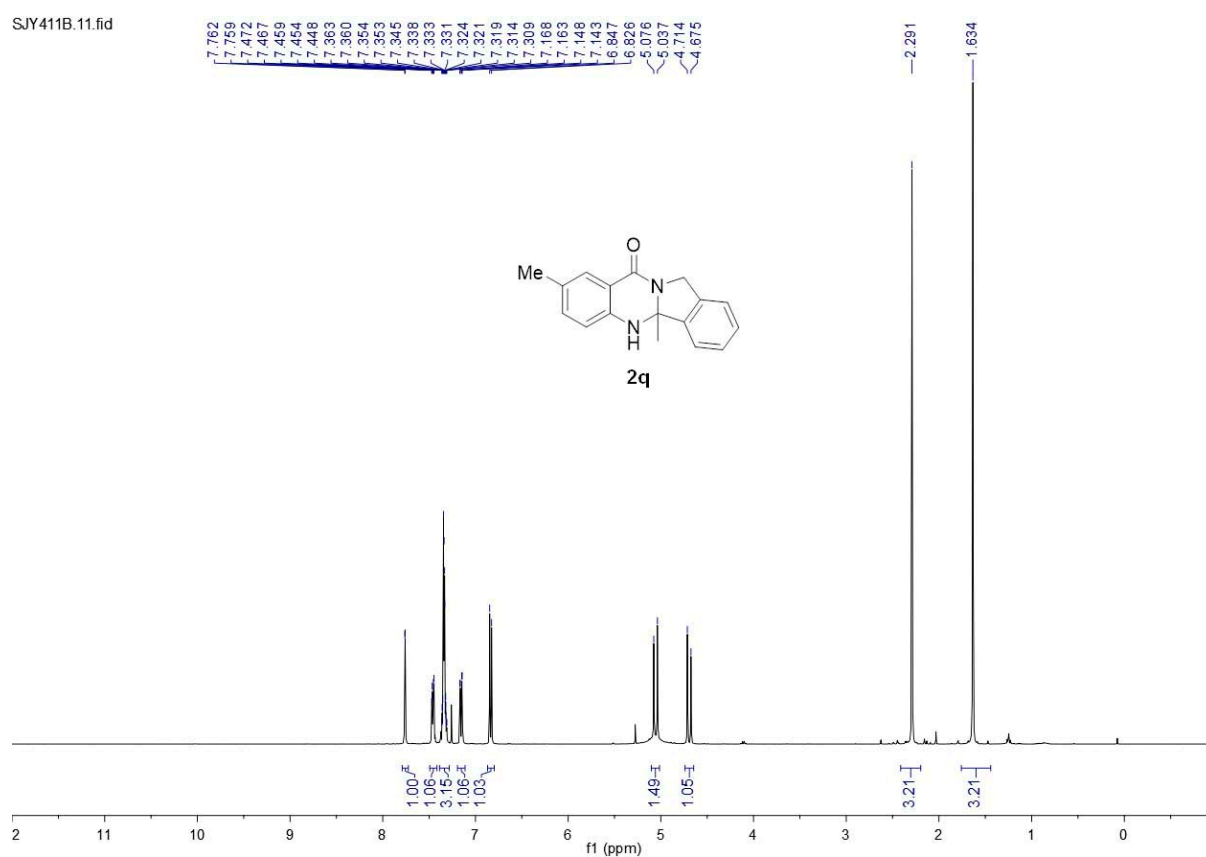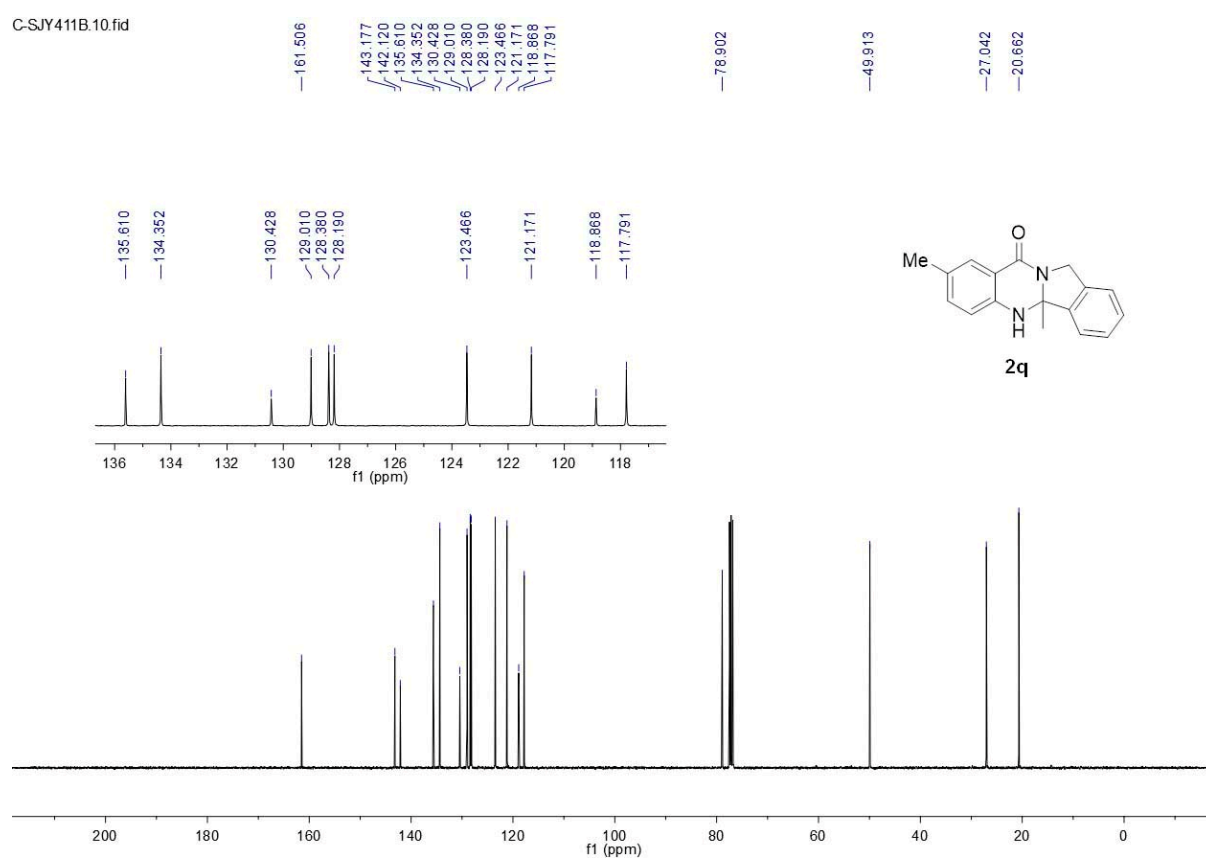

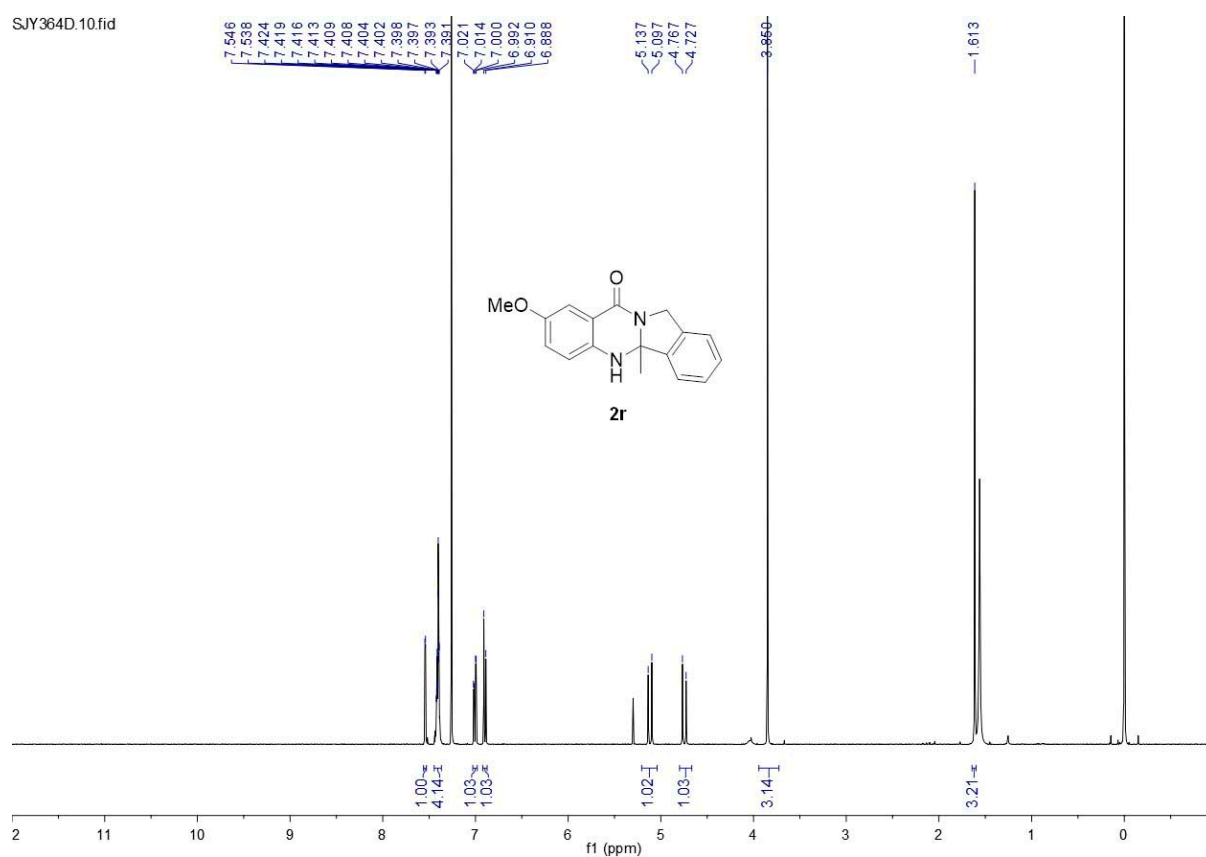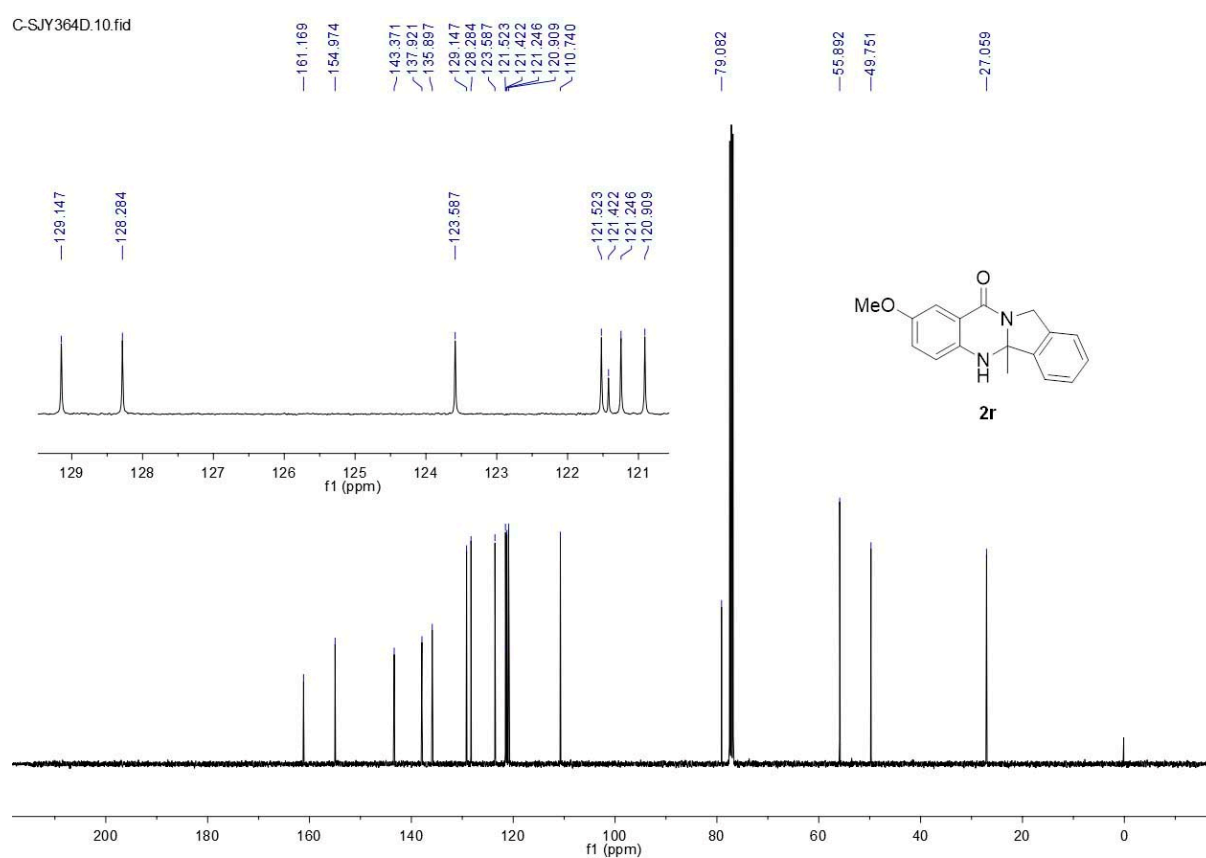

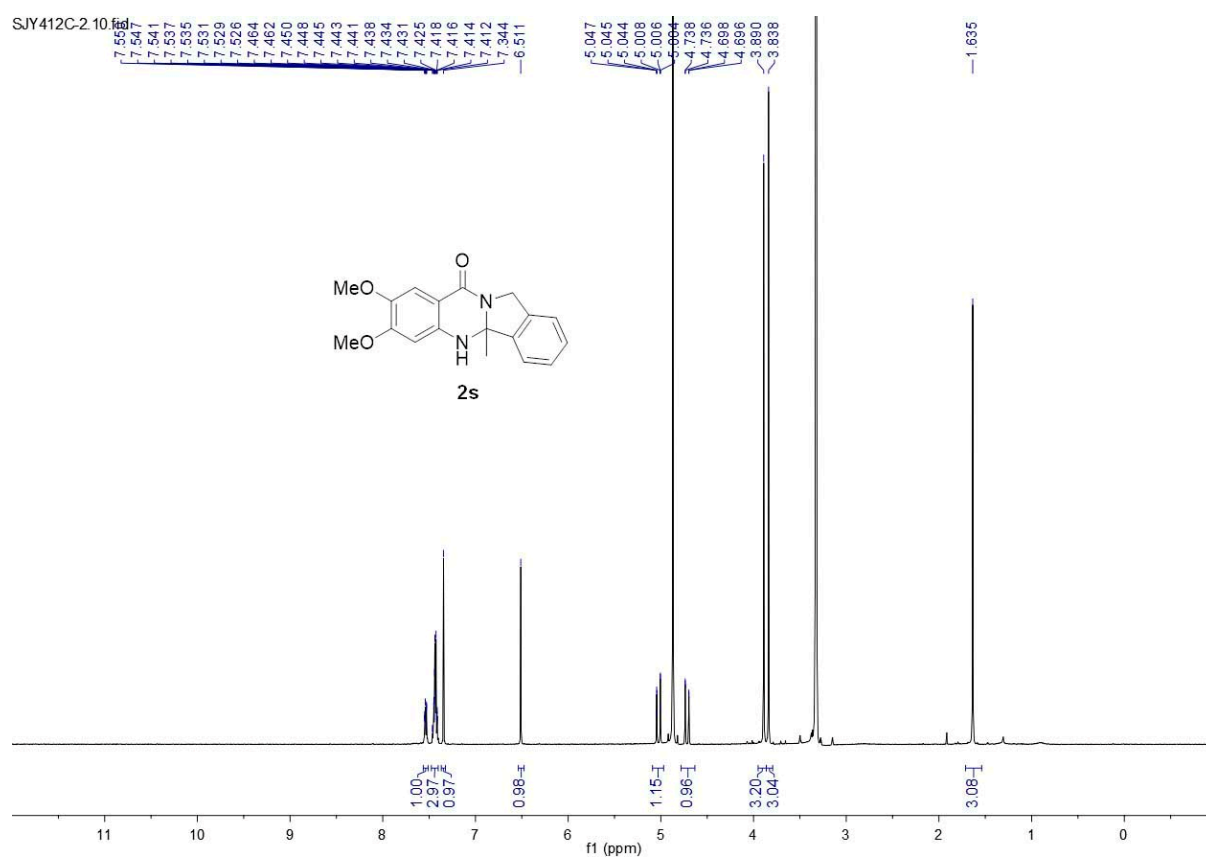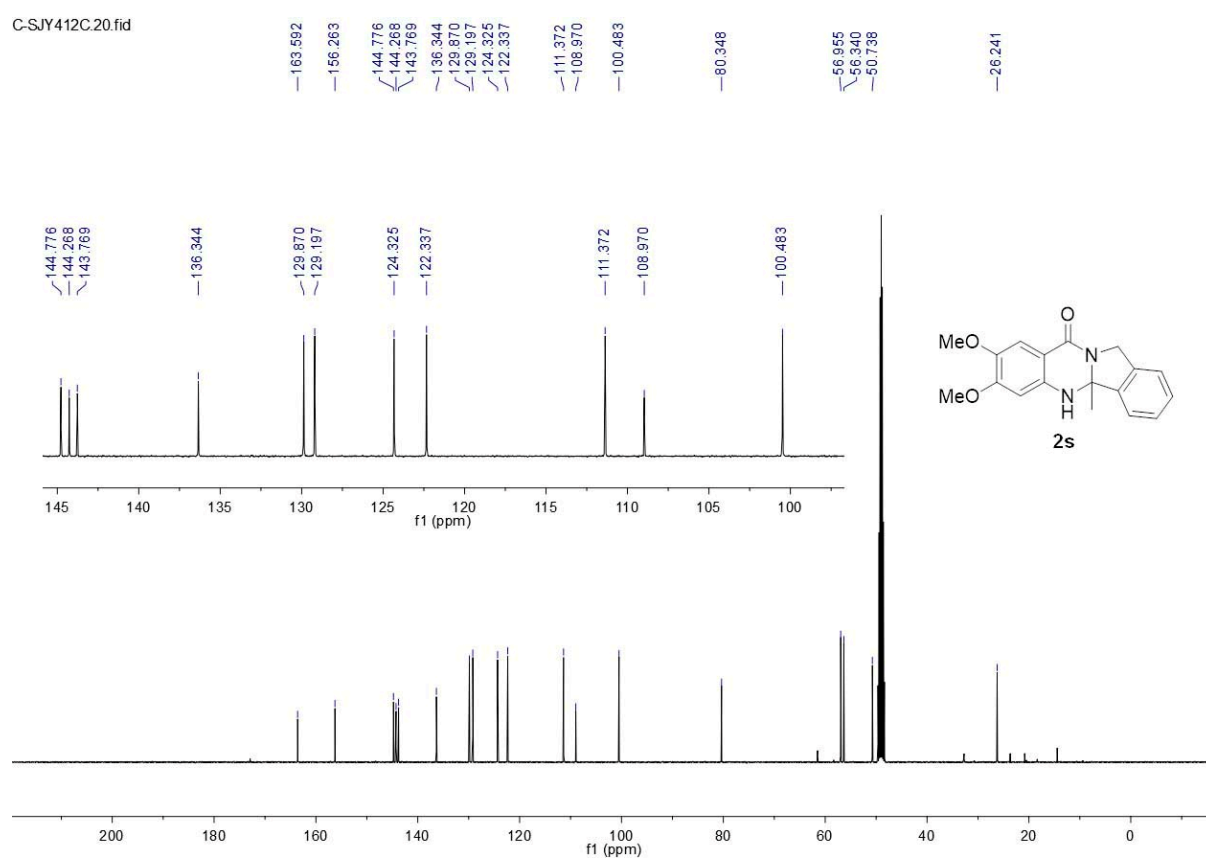

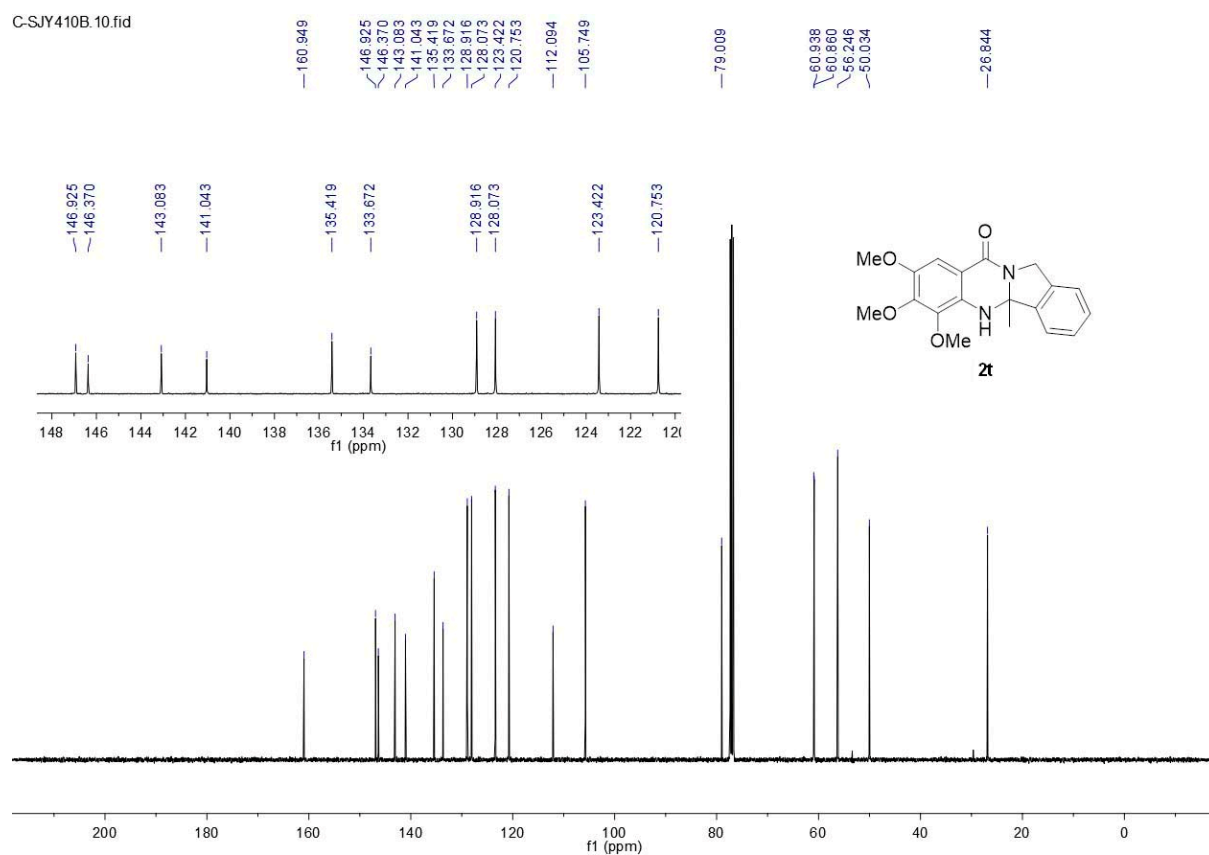

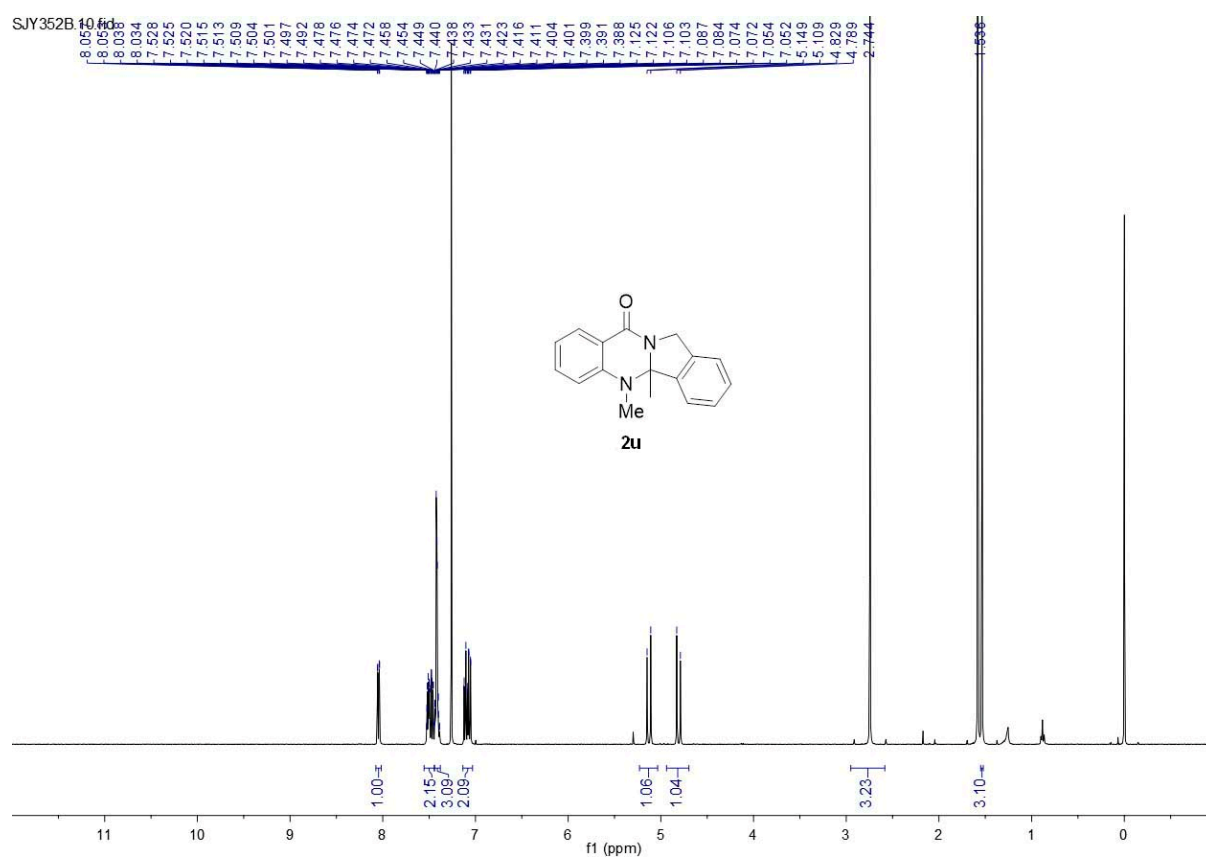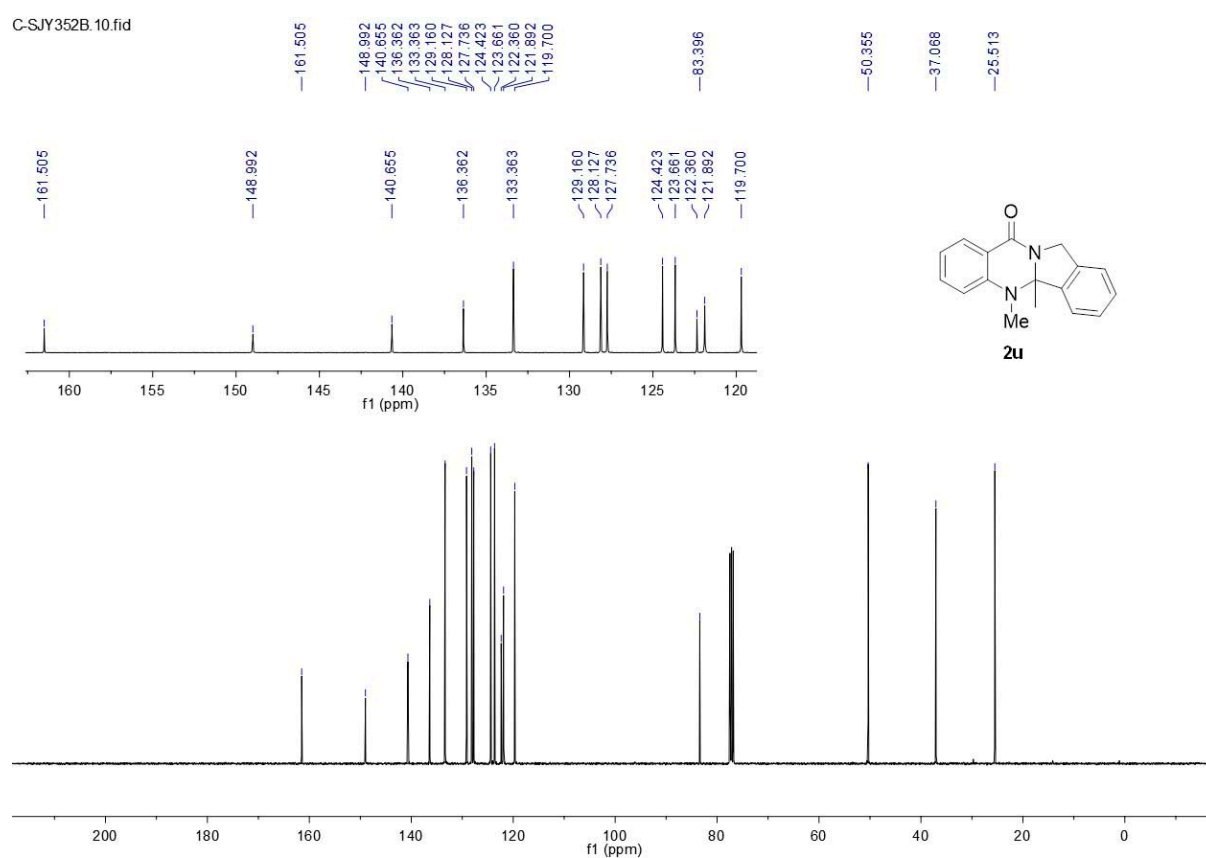

Supplement: s1 [file s1]
